# Supplementary material
Source: publisher figshare collection journal article supplement (https://rs.figshare.com/ndownloader/files/13124540)
Supplement: Supplementary file 1 [file 13124540]

## Sheet: 1-metadata
Dataset S2: Richness, crown and stem ages, and net diversification rates of rank-based clades
Data used in figure 3, appendix S3. See appendix S1 for details of clade delimitation and tests of monophyly.
Sheet 2: Families and aggregates of families
Column name	Description
clade	Number 1–200 (ordered first by monophyly, then by alphabetical order)
family	Families belonging to the clade. Clade is either a single monophyletic family, aggregate of non-monophyletic families, or subclade of Serranidae
monophyletic	"y" indicates clade is a single monophyletic family; "n" indicates an aggregate of non-monophyletic families or a subclade of the polyphyletic Serranidae
monotypic (only one species sampled)?	"y" indicates only one species was sampled in the phylogeny, so the crown age could not be calculated
total_richness	Total richness of the clade, based on FishBase (August 2016)
crown_age	Crown age of clade based on time-calibrated phylogeny (Rabosky et al. 2013). If "NA", the clade only has one species (sampled in the phylogeny)
stem_age	Stem age of clade based on time-calibrated phylogeny (Rabosky et al. 2013)
net_div_0_stem	Net diversification rate of the clade (Magallon and Sanderson 2001) assuming epsilon=0 and using the stem age
net_div_0.5_stem	Net diversification rate of the clade (Magallon and Sanderson 2001) assuming epsilon=0.5 and using the stem age
net_div_0.9_stem	Net diversification rate of the clade (Magallon and Sanderson 2001) assuming epsilon=0.9 and using the stem age
net_div_0_crown	Net diversification rate of the clade (Magallon and Sanderson 2001) assuming epsilon=0 and using the crown age
net_div_0.5_crown	Net diversification rate of the clade (Magallon and Sanderson 2001) assuming epsilon=0.5 and using the crown age
net_div_0.9_crown	Net diversification rate of the clade (Magallon and Sanderson 2001) assuming epsilon=0.9 and using the crown age
columns WA–FW	Richness of the clade in each region, based on Dataset S1 (range assignments of >17,000 species based on georeferenced data)
Sheet 3: Genera
Column name	Description
clade	Number 1–1,454 (ordered first by monophyly, then by alphabetical order)
genus	Genus name (following FishBase taxonomy as of August 2016)
family	Family that the genus belongs to (following FishBase taxonomy)
monophyletic?	"y" indicates genus is monophyletic; "n" indicates para- or polyphyly
monotypic (only one species sampled)?	"y" indicates only one species was sampled in the phylogeny, so the crown age could not be calculated
total_rich	Total richness of the genus, based on FishBase (August 2016)
crown_age	Crown age of clade based on time-calibrated phylogeny (Rabosky et al. 2013). If "NA", the clade only has one species (sampled in the phylogeny)
stem_age	Stem age of clade based on time-calibrated phylogeny (Rabosky et al. 2013)
net_div_0_stem	Net diversification rate of the clade (Magallon and Sanderson 2001) assuming epsilon=0 and using the stem age
net_div_0.5_stem	Net diversification rate of the clade (Magallon and Sanderson 2001) assuming epsilon=0.5 and using the stem age
net_div_0.9_stem	Net diversification rate of the clade (Magallon and Sanderson 2001) assuming epsilon=0.9 and using the stem age
net_div_0_crown	Net diversification rate of the clade (Magallon and Sanderson 2001) assuming epsilon=0 and using the crown age
net_div_0.5_crown	Net diversification rate of the clade (Magallon and Sanderson 2001) assuming epsilon=0.5 and using the crown age
net_div_0.9_crown	Net diversification rate of the clade (Magallon and Sanderson 2001) assuming epsilon=0.9 and using the crown age
columns WA–FW	Richness of the clade in each region, based on Dataset S1 (range assignments of >17,000 species based on georeferenced data)

## Sheet: 2-families
clade	family	monophyletic?	monotypic (only one species sampled)?	total_richness	crown_age	stem_age	net_div_0_stem	net_div_0.5_stem	net_div_0.9_stem	net_div_0_crown	net_div_0.5_crown	net_div_0.9_crown	WA	EA	WI	CIP	CP	EP	NC	SC	FW
1	Acanthuridae	y	n	82	49.9999	53.9	0.0817573	0.0691223	0.0409698	0.0742715	0.0687329	0.0431335	7	2	26	57	53	9	2	0	7
2	Achiridae	y	n	35	98.5554	98.6	0.0360583	0.0293141	0.0150264	0.0290415	0.0263754	0.0145053	19	0	1	0	0	10	3	0	27
3	Acropomatidae	y	n	32	49.1504	50.2	0.0690386	0.0558438	0.0281073	0.0564103	0.0511108	0.0276476	6	2	5	20	11	0	3	1	1
4	Adrianichthyidae	y	n	37	58.8337	92.4	0.0390792	0.0318662	0.0165158	0.0495935	0.0451048	0.0250549	0	0	0	0	0	0	0	0	37
5	Ambassidae	y	n	50	68.5622	88	0.0444548	0.0368032	0.0201699	0.0469482	0.0430082	0.0251327	0	0	5	11	5	0	0	1	50
6	Ammodytidae	y	n	31	28.9314	88.9	0.0386275	0.0311877	0.0155939	0.0947357	0.0857622	0.0461149	2	6	7	9	5	1	8	0	6
7	Anablepidae	y	n	18	48.1287	56.7	0.0509766	0.0397053	0.0175177	0.0456531	0.0406645	0.0195412	0	0	0	0	0	1	0	0	18
8	Anarhichadidae	y	n	5	13.1127	25.7	0.062624	0.0427476	0.0130923	0.0698781	0.0597853	0.0212672	3	0	0	0	0	0	5	0	0
9	Anoplopomatidae	y	y	2	NA	51.1	0.0135645	0.00793474	0.00186517	NA	NA	NA	0	0	0	0	1	1	2	0	0
10	Antennariidae	y	n	47	74.2807	74.3	0.0518189	0.0427733	0.0231866	0.0425009	0.038879	0.0224948	7	5	13	33	22	5	2	5	4
11	Aploactinidae	y	y	48	NA	41.7	0.0928346	0.0767068	0.0417378	NA	NA	NA	0	0	5	38	16	0	1	1	0
12	Aplocheilidae	y	n	14	70.0604	83.5	0.0316055	0.0241306	0.00997496	0.0277748	0.0245327	0.0111289	0	0	0	0	0	0	0	0	14
13	Aplodactylidae	y	n	5	22.9593	42.5	0.0378691	0.0258497	0.00791699	0.0399093	0.034145	0.0121463	0	0	0	2	2	1	0	1	0
14	Aracanidae	y	n	12	10.252	50	0.0496981	0.037436	0.0148387	0.174772	0.153546	0.0671455	0	0	1	6	9	0	0	4	0
15	Ariommatidae	y	n	7	29.7865	35.5	0.0548144	0.0390505	0.0132395	0.0420581	0.0362747	0.0139169	3	2	3	2	3	0	3	0	0
16	Arripidae	y	n	4	14.7694	29.1	0.047639	0.0314877	0.00901595	0.0469313	0.0401359	0.013715	0	0	0	2	3	0	0	3	3
17	Artedidraconidae	y	n	30	17.3832	17.6	0.19325	0.15573	0.0773282	0.155785	0.140903	0.0752923	0	0	0	0	0	0	0	30	0
18	Atherinidae	y	n	71	57.8901	58	0.0734945	0.0617848	0.0358524	0.0616605	0.0569053	0.0350283	2	5	10	32	20	2	3	6	47
19	Atherinopsidae	y	n	110	64.8768	65	0.0723151	0.0617905	0.0381006	0.0617684	0.0574579	0.0373788	19	1	0	0	0	21	6	3	88
20	Aulostomidae	y	n	3	105.801	105.9	0.0103741	0.0065453	0.00172164	0.00383234	0.00332452	0.00111325	2	1	1	1	1	1	1	0	0
21	Balistidae	y	n	42	24.2757	58.6	0.0637828	0.0523559	0.0278027	0.125414	0.114422	0.064976	6	6	23	27	24	10	4	0	2
22	Banjosidae	y	y	1	NA	18.7	0	0	0	NA	NA	NA	0	0	0	1	1	0	0	0	0
23	Bathydraconidae	y	n	17	13.3183	17.4	0.162828	0.126277	0.0549145	0.160686	0.142861	0.0677759	0	0	0	0	0	0	0	17	0
24	Bathymasteridae	y	n	7	17.9642	29.5	0.0659631	0.046993	0.0159323	0.0697365	0.0601472	0.0230757	0	0	0	0	0	2	7	0	0
25	Batrachoididae	y	n	83	41.3944	117.2	0.0377034	0.0318914	0.0189352	0.0900047	0.0833115	0.0523647	35	8	17	13	4	19	3	0	20
26	Bedotiidae	y	n	16	30.756	44.5	0.0623054	0.0480914	0.0205908	0.067611	0.05999	0.0280705	0	0	0	0	0	0	0	0	16
27	Bembridae	y	y	9	NA	44.4	0.049487	0.0362486	0.0132384	NA	NA	NA	0	0	2	7	5	1	0	0	0
28	Bovichtidae	y	n	11	24.6682	63.4	0.0378217	0.0282612	0.0109329	0.0691071	0.0605284	0.0259183	0	2	0	3	1	2	0	9	0
29	Bramidae	y	n	20	31.6001	68.1	0.0439902	0.0345283	0.0156345	0.0728664	0.065123	0.0320286	9	9	7	11	15	6	6	5	1
30	Bythitidae	y	n	212	68.9325	99.7	0.053727	0.0468219	0.0310489	0.0676523	0.0635395	0.0441616	35	12	17	91	52	23	7	8	10
31	Callanthiidae	y	y	14	NA	82.6	0.0319498	0.0243935	0.0100836	NA	NA	NA	0	2	2	5	7	3	0	2	0
32	Callionymidae	y	n	191	103.353	103.4	0.0507957	0.0441426	0.0289723	0.0441124	0.0413737	0.028488	6	13	39	108	53	5	16	4	15
33	Caproidae	y	n	18	73.2337	88	0.0328451	0.0255829	0.011287	0.0300029	0.0267245	0.0128423	2	3	10	3	7	2	3	1	0
34	Carapidae	y	n	36	48.8869	104.2	0.0343908	0.0280016	0.0144345	0.0591236	0.0537348	0.0297027	4	6	13	18	19	5	3	4	0
35	Centriscidae	y	n	12	105.769	105.9	0.0234647	0.0176752	0.00700602	0.0169403	0.0148829	0.0065083	3	7	7	9	8	3	1	3	2
36	Centrogenyidae	y	y	1	NA	54.4	0	0	0	NA	NA	NA	0	0	0	1	1	0	0	0	1
37	Centrolophidae	y	n	31	32.7751	56.8	0.0604575	0.0488132	0.0244066	0.0836257	0.0757045	0.0407068	5	9	8	14	11	3	5	13	2
38	Centropomidae	y	n	12	35.5081	75.5	0.0329127	0.0247921	0.00982698	0.0504606	0.0443322	0.0193865	10	0	0	0	0	8	0	0	11
39	Cepolidae	y	n	23	8.26675	88	0.0356306	0.0282376	0.0132176	0.295442	0.265184	0.13436	0	2	4	19	8	0	0	2	1
40	Ceratiidae	y	y	4	NA	30.9	0.0448639	0.0296534	0.00849075	NA	NA	NA	3	4	2	1	4	2	2	3	0
41	Cetomimidae	y	n	30	32.0433	88	0.03865	0.0311459	0.0154656	0.0845121	0.0764386	0.0408454	15	13	6	7	13	6	5	2	0
42	Chaetodontidae	y	n	129	50.748	80.7	0.0602207	0.0517272	0.0325238	0.0821049	0.0765712	0.050705	9	8	44	79	63	11	1	1	7
43	Champsodontidae	y	n	13	89.5856	89.7	0.0285948	0.0216935	0.00878994	0.020894	0.0184079	0.0082054	0	0	3	10	7	0	0	0	0
44	Channichthyidae	y	n	25	14.5767	17.8	0.180836	0.144098	0.0687514	0.173272	0.155911	0.0803641	0	0	0	0	0	0	1	25	0
45	Chaunacidae	y	n	22	11.5784	62.5	0.0494567	0.0390776	0.0181024	0.207101	0.18564	0.093184	4	4	8	11	12	1	6	6	0
46	Cheilodactylidae	y	n	27	45.1143	47.2	0.0698271	0.0559122	0.0271384	0.057691	0.0520262	0.0272349	2	5	9	13	12	2	1	6	2
47	Chiasmodontidae	y	y	32	NA	79.9	0.0433759	0.0350859	0.0176594	NA	NA	NA	20	15	14	17	20	9	10	5	0
48	Chironemidae	y	n	6	17.6443	42.5	0.042159	0.0294768	0.00954036	0.0622644	0.0534683	0.0197883	0	0	0	3	5	0	0	2	0
49	Cichlidae	y	n	1685	71.3867	109.2	0.0680359	0.0616938	0.0469987	0.0943646	0.090342	0.0711751	0	2	0	0	1	0	0	0	1685
50	Cirrhitidae	y	n	33	53.628	62.6	0.0558548	0.045259	0.0229247	0.0522742	0.047402	0.025789	2	3	11	13	21	4	0	0	1
51	Citharidae	y	n	6	86.1475	97.7	0.0183394	0.0128225	0.0041501	0.0127527	0.0109511	0.00405294	0	1	1	5	2	0	0	0	0
52	Congiopodidae	y	n	8	28.7568	31	0.0670788	0.0485186	0.017117	0.0482075	0.0417581	0.0165444	0	2	2	0	1	1	0	5	0
53	Cryptacanthodidae	y	y	4	NA	41.7	0.0332445	0.0219734	0.00629171	NA	NA	NA	0	0	0	0	0	0	4	0	0
54	Cynoglossidae	y	n	143	54.6331	91.3	0.0543576	0.0468419	0.0298061	0.0781522	0.0729997	0.0488683	27	15	28	56	14	22	16	0	34
55	Cyprinodontidae	y	n	136	55.8831	57	0.0861869	0.074155	0.0469149	0.075506	0.0704744	0.0469314	3	1	1	1	0	0	1	0	136
56	Dactylopteridae	y	n	7	24.3008	102.3	0.0190216	0.0135513	0.00459437	0.0515523	0.0444635	0.0170586	2	3	4	6	3	0	1	0	1
57	Datnioididae	y	y	5	NA	58.6	0.0274648	0.0187477	0.00574185	NA	NA	NA	0	0	0	0	0	0	0	0	5
58	Dichistiidae	y	y	2	NA	42.3	0.0163865	0.00958546	0.0022532	NA	NA	NA	0	1	2	0	0	0	0	0	0
59	Dinolestidae	y	y	1	NA	17.8	0	0	0	NA	NA	NA	0	0	0	1	1	0	0	1	0
60	Dinopercidae	y	n	2	30.1904	61.4	0.011289	0.00660367	0.00155228	0	0	0	0	1	1	0	0	0	0	0	0
61	Diodontidae	y	n	17	15.196	70.9	0.0399607	0.0309905	0.0134769	0.140831	0.125208	0.0594011	9	6	9	12	9	5	5	3	2
62	Draconettidae	y	y	15	NA	89.7	0.0301901	0.0231822	0.00975996	NA	NA	NA	2	1	1	4	7	3	1	0	0
63	Drepaneidae	y	n	3	19.7838	55.8	0.0196884	0.012422	0.00326741	0.0204948	0.0177791	0.00595351	0	2	2	2	2	0	0	0	3
64	Eleginopsidae	y	y	1	NA	43.1	0	0	0	NA	NA	NA	0	0	0	0	0	0	0	1	0
65	Embiotocidae	y	n	24	35.9089	108.7	0.0292369	0.0232358	0.0109836	0.0692002	0.062192	0.03179	0	0	0	4	0	15	20	0	3
66	Emmelichthyidae	y	n	17	19.3185	58	0.0488485	0.0378832	0.0164743	0.110778	0.0984892	0.0467252	2	4	6	6	6	5	1	1	0
67	Enoplosidae	y	y	1	NA	66.3	0	0	0	NA	NA	NA	0	0	0	1	1	0	0	1	1
68	Ephippidae	y	n	15	25.8867	55.8	0.0485314	0.037266	0.0156894	0.0778355	0.0689122	0.031769	3	2	5	9	5	2	1	0	6
69	Epigonidae	y	n	44	26.2391	33.9	0.111628	0.0918441	0.0491949	0.117803	0.107597	0.0615811	11	11	11	6	18	7	5	4	1
70	Fistulariidae	y	n	4	21.8882	103.4	0.0134071	0.00886161	0.00253737	0.0316676	0.0270823	0.0092544	3	2	2	2	2	4	3	2	2
71	Fundulidae	y	n	44	33.2826	61	0.0620359	0.0510412	0.0273395	0.0928727	0.084827	0.048549	10	0	0	0	0	1	4	0	43
72	Gempylidae	y	n	24	67.1579	69.6	0.0456617	0.0362892	0.0171541	0.037001	0.0332537	0.0169979	12	9	8	13	19	9	8	5	2
73	Gerreidae	y	n	54	95.3817	96.4	0.0413795	0.0343795	0.0190928	0.0345542	0.0317085	0.018754	16	3	6	25	7	11	1	2	37
74	Gigantactinidae	y	y	23	NA	44.8	0.0699887	0.0554667	0.0259632	NA	NA	NA	8	6	2	6	12	3	5	1	0
75	Glaucosomatidae	y	n	4	24.0891	71.7	0.0193346	0.0127795	0.0036592	0.0287743	0.0246079	0.00840887	0	0	0	3	1	0	0	0	0
76	Gnathanacanthidae	y	y	1	NA	52	0	0	0	NA	NA	NA	0	0	0	1	0	0	0	1	0
77	Goodeidae	y	n	49	24.9392	44.7	0.0870653	0.0720106	0.0393257	0.128259	0.117441	0.0684082	0	0	0	0	0	0	0	0	49
78	Grammatidae	y	y	13	NA	101.8	0.025196	0.019115	0.00774516	NA	NA	NA	13	0	0	0	1	0	0	0	0
79	Harpagiferidae	y	n	11	5.00876	17.4	0.13781	0.102975	0.039836	0.340353	0.298103	0.127648	0	0	0	0	0	0	0	11	0
80	Himantolophidae	y	n	21	22.1091	31.1	0.0978946	0.0771027	0.0353252	0.106353	0.0951963	0.0473142	9	7	3	5	6	2	4	2	0
81	Hoplichthyidae	y	y	12	NA	83.3	0.0298308	0.0224706	0.00890681	NA	NA	NA	0	0	1	8	6	1	0	1	0
82	Icosteidae	y	y	1	NA	40.6	0	0	0	NA	NA	NA	0	0	0	0	0	0	1	0	0
83	Isonidae	y	y	5	NA	58.1	0.0277012	0.018909	0.00579126	NA	NA	NA	0	0	1	1	3	0	0	1	1
84	Istiophoridae	y	n	11	23.1207	42.8	0.0560256	0.0418635	0.016195	0.0737325	0.0645797	0.0276531	7	6	7	4	5	4	6	3	0
85	Kuhliidae	y	n	13	53.8492	54	0.0474991	0.0360354	0.0146011	0.0347601	0.0306241	0.0136508	2	0	3	3	6	2	0	0	11
86	Kyphosidae	y	n	54	42.0633	42.3	0.0943022	0.0783496	0.0435118	0.0783543	0.0719016	0.0425261	6	6	5	18	25	16	7	10	6
87	Lateolabracidae	y	n	2	15.8495	17.8	0.0389409	0.0227789	0.0053545	0	0	0	0	0	0	2	0	0	1	0	1
88	Latidae	y	n	13	54.3691	105.6	0.0242893	0.0184272	0.00746645	0.0344277	0.0303313	0.0135203	0	0	1	4	3	0	0	1	12
89	Latridae	y	n	5	20.3491	89.7	0.0179425	0.0122476	0.00375108	0.0450285	0.0385248	0.0137043	2	2	1	3	2	2	0	3	0
90	Leiognathidae	y	n	48	45.5619	80.7	0.0479703	0.0396366	0.0215671	0.0697524	0.0638392	0.0370626	0	0	18	42	17	0	1	0	20
91	Leptobramidae	y	y	1	NA	65.8	0	0	0	NA	NA	NA	0	0	0	1	1	0	0	0	1
92	Leptoscopidae	y	y	5	NA	72.5	0.0221991	0.0151533	0.004641	NA	NA	NA	0	0	0	2	4	0	0	4	0
93	Lethrinidae	y	n	40	57.3245	80.2	0.045996	0.0376612	0.0198159	0.0522592	0.047622	0.0268176	0	2	21	34	30	0	0	1	6
94	Linophrynidae	y	y	27	NA	44.8	0.0735678	0.0589075	0.0285923	NA	NA	NA	11	8	2	4	4	9	6	0	0
95	Lobotidae	y	y	2	NA	85.1	0.00814509	0.00476457	0.00111998	NA	NA	NA	2	1	1	1	1	2	1	1	2
96	Lophiidae	y	n	28	53.943	74.3	0.044848	0.0359912	0.0176088	0.0489231	0.0441647	0.023286	7	6	4	12	8	3	6	0	0
97	Luvaridae	y	y	1	NA	57.4	0	0	0	NA	NA	NA	1	1	1	0	1	1	1	0	0
98	Malacanthidae	y	n	45	55.055	59.5	0.0639775	0.0526974	0.0283428	0.0565528	0.051681	0.0296892	11	1	6	26	8	4	4	1	1
99	Melanocetidae	y	y	6	NA	30.9	0.0579857	0.0405425	0.0131218	NA	NA	NA	3	2	1	2	3	4	1	2	0
100	Melanotaeniidae	y	n	81	39.9134	44.5	0.0987517	0.0834511	0.0493758	0.0927334	0.0857984	0.0537569	0	0	0	0	0	0	0	0	81
101	Menidae	y	y	1	NA	58.2	0	0	0	NA	NA	NA	0	0	1	1	1	0	0	0	1
102	Molidae	y	n	4	41.505	78.8	0.0175926	0.0116281	0.0033295	0.0167003	0.0142822	0.00488043	3	3	3	3	3	3	2	0	1
103	Monacanthidae	y	n	107	44.3188	58.6	0.0797411	0.0680714	0.041826	0.0897967	0.0834918	0.0541413	11	5	28	78	57	4	12	14	6
104	Monodactylidae	y	y	6	NA	61.5	0.0291343	0.0203701	0.00659293	NA	NA	NA	0	3	2	4	2	0	0	2	5
105	Moronidae	y	n	6	74	98.4	0.0182089	0.0127313	0.00412058	0.0148461	0.0127488	0.00471825	2	2	1	0	0	0	3	0	6
106	Mugilidae	y	n	75	58.52	95.5	0.0452093	0.0380899	0.0222851	0.0619334	0.0572181	0.0354853	12	18	23	29	20	8	3	3	61
107	Mullidae	y	n	86	72.3852	72.5	0.0614393	0.0520381	0.0310523	0.0519609	0.0481282	0.0303889	6	4	35	45	34	6	6	4	10
108	Nematistiidae	y	y	1	NA	70.3	0	0	0	NA	NA	NA	0	0	0	0	0	1	0	0	0
109	Nemipteridae	y	n	67	72.7895	72.9	0.0576775	0.0483726	0.027821	0.0482425	0.0444707	0.0271533	0	0	19	67	23	1	0	0	5
110	Neosebastidae	y	n	18	18.4848	38.6	0.0748801	0.0583236	0.0257319	0.118867	0.105878	0.0508792	0	1	0	12	8	1	0	5	0
111	Nomeidae	y	n	16	27.98	35.5	0.0781011	0.0602836	0.025811	0.0743188	0.0659418	0.0308554	10	9	11	10	10	8	6	3	1
112	Normanichthyidae	y	y	1	NA	73.3	0	0	0	NA	NA	NA	0	0	0	0	0	1	0	0	0
113	Nothobranchiidae	y	n	262	75.8535	83.5	0.0666868	0.0584312	0.0395154	0.0642712	0.0605232	0.0428213	0	0	0	0	0	0	0	0	262
114	Nototheniidae	y	n	55	23.8277	26.5	0.15122	0.125744	0.070049	0.13909	0.127686	0.075733	3	2	0	0	0	3	0	55	0
115	Ogcocephalidae	y	n	78	30.7853	62.5	0.0697073	0.0588208	0.0346132	0.119004	0.110026	0.0685947	20	8	27	34	29	13	12	2	0
116	Oneirodidae	y	n	64	24.6987	35.9	0.115846	0.0969705	0.0553725	0.140321	0.129229	0.0783922	24	20	4	19	20	17	21	7	0
117	Ophidiidae	y	n	258	88.6704	99.7	0.0556967	0.0487832	0.0329455	0.0548076	0.051602	0.036464	81	39	39	93	59	41	26	8	4
118	Opistognathidae	y	y	80	NA	98.2	0.0446235	0.0376915	0.0222612	NA	NA	NA	17	0	11	37	10	13	0	1	1
119	Oplegnathidae	y	n	7	34.5404	46.4	0.0419377	0.029877	0.0101294	0.0362695	0.0312822	0.0120015	0	0	3	3	3	1	1	0	0
120	Ostraciidae	y	n	24	31.1108	50	0.0635611	0.0505146	0.0238784	0.0798729	0.0717838	0.0366929	6	2	7	14	10	2	9	0	2
121	Ostracoberycidae	y	y	3	NA	29.1	0.037753	0.0238195	0.00626535	NA	NA	NA	0	1	1	3	2	0	0	0	0
122	Pataecidae	y	y	3	NA	41.7	0.0263456	0.0166222	0.00437222	NA	NA	NA	0	0	0	3	1	0	0	1	0
123	Pegasidae	y	y	5	NA	117.1	0.0137441	0.00938183	0.00287338	NA	NA	NA	0	0	2	5	4	0	0	1	3
124	Pempheridae	y	n	32	38.3512	71.7	0.0483366	0.0390985	0.019679	0.0722947	0.0655028	0.0354328	3	0	11	23	15	0	0	3	1
125	Pentacerotidae	y	n	13	14.0714	18.4	0.139399	0.105756	0.0428509	0.133021	0.117194	0.0522395	0	3	3	9	8	2	2	5	0
126	Percidae	y	n	236	42.4032	63.3	0.0863165	0.0754331	0.050532	0.112508	0.105812	0.0742226	0	0	0	0	0	0	0	0	236
127	Percophidae	y	y	50	NA	76.5	0.0511376	0.0423357	0.023202	NA	NA	NA	11	4	7	21	19	6	3	5	0
128	Peristediidae	y	n	44	13.8947	56.3	0.0672147	0.0553022	0.0296218	0.222462	0.20319	0.116291	14	4	5	23	14	4	5	1	0
129	Phallostethidae	y	y	23	NA	93.8	0.0334274	0.0264915	0.0124003	NA	NA	NA	0	0	0	5	0	0	0	0	23
130	Pholidae	y	n	15	23.0628	33.1	0.0818142	0.062823	0.0264492	0.0873659	0.07735	0.0356589	1	1	0	2	0	2	15	0	1
131	Pholidichthyidae	y	y	2	NA	88	0.00787667	0.00460756	0.00108307	NA	NA	NA	0	0	0	2	0	0	0	0	0
132	Plectrogeniidae	y	y	2	NA	42.3	0.0163865	0.00958546	0.0022532	NA	NA	NA	0	0	1	1	2	1	0	0	0
133	Plesiopidae	y	n	50	84.4835	84.7	0.0461868	0.0382371	0.0209558	0.0381006	0.0349031	0.0203963	0	0	9	37	21	0	1	7	3
134	Poeciliidae	y	n	353	54.7744	56.7	0.103465	0.0912901	0.0632991	0.0944478	0.0892415	0.0645866	0	0	0	0	0	1	0	0	353
135	Polynemidae	y	n	42	75.2255	98.5	0.0379459	0.0311477	0.0165405	0.0404719	0.0369246	0.0209681	4	5	8	23	7	2	0	0	30
136	Polyprionidae	y	n	4	16.3265	18.4	0.0753421	0.0497984	0.0142589	0.0424554	0.0363081	0.012407	2	1	1	2	1	1	3	1	0
137	Pomacanthidae	y	n	89	49.8687	85	0.0528075	0.0447843	0.0268516	0.0761096	0.0705396	0.0447336	7	2	21	48	38	5	0	0	1
138	Pomacentridae	y	n	389	55.6917	84.7	0.0704083	0.062255	0.0434931	0.0946358	0.0895111	0.0652253	27	16	107	237	185	28	6	3	12
139	Pomatomidae	y	y	1	NA	56.8	0	0	0	NA	NA	NA	1	0	0	0	0	0	1	0	1
140	Priacanthidae	y	n	19	75.6211	88.5	0.0332705	0.0260179	0.0116341	0.0297707	0.0265638	0.0129189	4	3	8	12	10	3	4	2	0
141	Profundulidae	y	n	8	41.5183	44.7	0.0465199	0.0336483	0.0118709	0.03339	0.0289229	0.0114591	0	0	0	0	0	0	0	0	8
142	Psettodidae	y	n	3	39.8849	104.1	0.0105534	0.00665847	0.00175141	0.0101659	0.00881881	0.00295307	0	2	0	1	1	0	0	0	1
143	Pseudaphritidae	y	y	2	NA	63.4	0.0109329	0.00639535	0.00150332	NA	NA	NA	0	0	0	1	1	1	0	1	1
144	Pseudochromidae	y	n	152	48.8447	101.3	0.0495941	0.0428163	0.0274316	0.0886633	0.0828928	0.0558374	0	3	60	93	30	1	0	0	3
145	Pseudomugilidae	y	n	18	43.6795	45.4	0.0636646	0.0495879	0.0218778	0.0503034	0.0448067	0.0215317	0	0	0	2	0	0	0	0	18
146	Ptilichthyidae	y	y	1	NA	33.1	0	0	0	NA	NA	NA	0	0	0	0	0	0	1	0	0
147	Rivulidae	y	n	393	78.2424	89.1	0.0670461	0.0592952	0.0414575	0.067491	0.0638431	0.0465542	0	0	0	0	0	0	0	0	393
148	Samaridae	y	n	27	16.6415	97.7	0.0337343	0.0270118	0.0131109	0.156398	0.141041	0.0738324	0	0	7	15	11	0	0	0	1
149	Scatophagidae	y	n	4	12.642	89.8	0.0154376	0.0102037	0.00292165	0.0548289	0.04689	0.016023	0	0	1	3	2	0	0	0	4
150	Sciaenidae	y	n	283	52.0554	71.2	0.07929	0.0696043	0.04739	0.0951352	0.0896689	0.0638318	89	19	27	84	8	87	21	1	138
151	Scombridae	y	n	54	55	64.2	0.0621337	0.0516228	0.028669	0.0599243	0.0549893	0.0325234	20	19	17	30	23	20	22	10	17
152	Scombrolabracidae	y	y	1	NA	71.7	0	0	0	NA	NA	NA	1	1	1	1	1	1	1	0	0
153	Scombropidae	y	n	3	7.07545	33.9	0.0324074	0.0204468	0.00537822	0.0573059	0.0497124	0.0166467	1	1	1	1	0	0	0	0	0
154	Scophthalmidae	y	n	9	56.6831	94.7	0.0232019	0.0169951	0.00620683	0.0265348	0.0230776	0.0094097	1	8	0	0	0	0	9	0	2
155	Siganidae	y	n	29	21.586	90.9	0.037044	0.0297915	0.0146865	0.123884	0.111944	0.0594283	1	0	7	25	18	0	0	0	8
156	Sillaginidae	y	n	34	78.8463	96.4	0.0365805	0.0296909	0.0151309	0.0359334	0.0326099	0.0178393	0	1	6	27	10	0	1	4	12
157	Soleidae	y	n	173	86.6611	91.3	0.0564435	0.0489147	0.031779	0.0514665	0.048206	0.0328866	1	30	35	86	37	1	7	1	47
158	Sparidae	y	n	145	62.1732	72.9	0.068268	0.058854	0.0375085	0.0688976	0.0643686	0.043152	21	63	60	34	11	3	11	5	37
159	Sphyraenidae	y	n	27	62.4263	65.8	0.0500887	0.0401073	0.0194671	0.0416922	0.0375984	0.0196821	7	7	10	13	11	6	6	3	6
160	Stichaeidae	y	n	70	29.4771	29.5	0.144017	0.121001	0.0700631	0.120614	0.111281	0.0683651	1	0	0	4	0	5	67	0	1
161	Stromateidae	y	n	15	57.9788	75.2	0.0360113	0.0276521	0.0116419	0.0347524	0.0307683	0.0141844	7	1	3	5	0	5	5	2	3
162	Synanceiidae	y	n	36	44.6986	44.8	0.0799893	0.0651288	0.0335732	0.0646636	0.0587699	0.0324859	1	0	14	26	10	0	3	0	5
163	Syngnathidae	y	n	296	96.947	112	0.0508068	0.0446481	0.0305154	0.0515458	0.0486093	0.0347236	32	23	67	145	108	15	25	25	71
164	Telmatherinidae	y	y	18	NA	73.1	0.03954	0.0307974	0.0135876	NA	NA	NA	0	0	0	1	0	0	0	0	18
165	Terapontidae	y	n	52	29.5186	46.4	0.0851561	0.0706281	0.0389717	0.110374	0.1012	0.0595051	0	0	3	12	9	0	1	1	50
166	Tetragonuridae	y	y	3	NA	40.6	0.0270594	0.0170726	0.00449068	NA	NA	NA	1	2	2	2	3	1	2	1	0
167	Tetraodontidae	y	n	200	56.1727	70.9	0.0747294	0.0650234	0.0428738	0.0819824	0.0769398	0.053199	20	16	47	89	67	19	23	11	80
168	Tetrarogidae	y	n	40	57.0058	57.1	0.0646038	0.0528971	0.0278325	0.0525513	0.0478882	0.0269675	0	0	9	33	13	0	3	3	8
169	Toxotidae	y	n	7	48.8022	98.5	0.0197554	0.0140741	0.00477161	0.0256702	0.0221404	0.00849422	0	0	0	0	0	0	0	0	7
170	Trachinidae	y	n	8	27.2285	77	0.0270057	0.0195335	0.00689128	0.0509134	0.044102	0.017473	0	8	0	0	0	0	2	0	0
171	Triacanthidae	y	n	7	24.2332	85.7	0.0227061	0.0161761	0.00548429	0.0516961	0.0445875	0.0171062	0	0	2	7	5	0	0	0	2
172	Trichiuridae	y	n	45	66.3396	68.1	0.0558981	0.0460425	0.0247636	0.046933	0.0428898	0.024639	9	7	12	28	15	7	10	2	7
173	Triglidae	y	n	125	54.7321	56.3	0.0857605	0.0735903	0.0460969	0.0755528	0.0704258	0.0464765	24	15	19	51	36	11	16	6	16
174	Triodontidae	y	y	1	NA	84.6	0	0	0	NA	NA	NA	0	0	1	1	1	0	0	0	0
175	Uranoscopidae	y	n	53	77.4644	100	0.0397029	0.0329584	0.0182455	0.0423052	0.0388052	0.0228851	6	5	10	27	13	2	7	9	2
176	Valenciidae	y	n	3	23.2488	57	0.0192739	0.0121605	0.00319862	0.0174403	0.0151293	0.0050662	0	0	0	0	0	0	0	0	3
177	Xiphiidae	y	y	1	NA	42.8	0	0	0	NA	NA	NA	1	1	0	0	0	1	1	0	0
178	Zanclidae	y	y	1	NA	53.9	0	0	0	NA	NA	NA	0	0	0	1	1	0	0	0	0
179	Zaproridae	y	y	1	NA	37.1	0	0	0	NA	NA	NA	0	0	0	0	0	0	1	0	0
180	Zenarchopteridae	y	n	63	43.3902	56.4	0.0734598	0.0614492	0.0350014	0.0795108	0.0732024	0.0443046	0	0	1	10	4	0	0	0	61
181	Zoarcidae	y	n	302	25.5861	25.7	0.222196	0.195354	0.133743	0.196094	0.184965	0.132331	18	10	4	19	4	34	184	65	8
182	Belonidae, Scomberesocidae	n	n	43	49.8514	56.4	0.0666879	0.0548057	0.0292315	0.061544	0.0561815	0.0320306	9	13	11	14	9	12	8	2	26
183	Caesionidae, Lutjanidae	n	n	133	48.04	55.5	0.0881144	0.0757602	0.0478062	0.0873689	0.0815189	0.0541582	24	7	46	86	62	17	10	0	27
184	Carangidae, Echeneidae, Rachycentridae, Coryphaenidae	n	n	157	71.8	78.7	0.0642471	0.0555203	0.0356976	0.0607674	0.0568392	0.0384116	61	41	54	83	72	52	38	12	67
185	Eleotridae, Odontobutidae, Rhyacichthyidae, Gobiidae, Microdesmidae, Kraemeriidae, Kurtidae, Apogonidae, Platycephalidae	n	n	2456	110.5	117.9	0.0662111	0.0603354	0.0467121	0.0643723	0.0617721	0.0493761	195	126	473	1129	599	140	71	39	1040
186	Haemulidae, Hapalogenyidae	n	n	141	48.1	55.5	0.0891668	0.076805	0.0487937	0.0884743	0.0826238	0.0552303	39	14	32	42	14	46	4	1	32
187	Hemiramphidae, Exocoetidae	n	n	125	71.4	74.6	0.0647227	0.055538	0.0347889	0.0579155	0.0539854	0.0356269	34	21	37	66	44	37	23	8	28
188	Hexagrammidae, Liparidae, Cyclopteridae, Trichodontidae, Cottidae, Comephoridae, Abyssocottidae, Cottocomephoridae, Psychrolutidae, Hemitripteridae, Agonidae, Ereuniidae, Rhamphocottidae	n	n	834	46.9	49.2	0.136712	0.122648	0.0901297	0.128637	0.122526	0.0934554	16	19	8	60	18	57	486	161	123
189	Hypoptychidae, Aulorhynchidae, Gasterosteidae	n	n	21	43.2	63.5	0.0479452	0.0377621	0.017301	0.05443	0.0487199	0.0242146	1	4	0	3	0	1	12	0	17
190	Labridae, Scaridae, Odacidae	n	n	631	82.8	88.9	0.0725231	0.064744	0.0467816	0.0694947	0.0660372	0.0496081	53	46	165	356	279	44	16	23	19
191	Nandidae, Mastacembelidae, Synbranchidae, Indostomidae, Badidae, Polycentridae, Pristolepididae, Osphronemidae, Anabantidae, Helostomatidae, Channidae	n	n	361	83.9	112.6	0.0522991	0.0461678	0.0320685	0.0619277	0.0585281	0.0424262	0	0	0	0	0	0	0	0	361
192	Paralichthyidae, Bothidae, Pleuronectidae	n	n	376	89.8	100.9	0.058767	0.0519237	0.036181	0.0583123	0.055135	0.0400813	71	25	54	120	98	72	98	27	31
193	Percichthyidae, Elassomatidae, Centrarchidae	n	n	83	64.5	69.1	0.0639485	0.0540907	0.0321158	0.0577627	0.0534672	0.0336063	0	0	0	0	0	0	0	0	83
194	Pinguipedidae, Cheimarrichthyidae	n	n	84	94.8	97.3	0.0455377	0.0385355	0.022919	0.0394269	0.036503	0.0229791	2	5	14	54	32	3	0	4	4
195	Scorpaenidae and Sebastidae	n	n	346	59.6	68.3	0.0855994	0.0754931	0.0522626	0.0864646	0.0816808	0.0590297	32	35	75	124	105	75	106	7	10
196	Serranidae: Acanthistius	n	y	11	NA	31	0.0773515	0.0577987	0.0223596	NA	NA	NA	2	0	3	3	5	1	0	3	1
197	Serranidae: Epinephelinae (including Cephalopholis), Grammistinae, Diploprioninae, Liopropomatinae, Anthiinae (except Acanthistius; including Caesioperca and Plectranthias)	n	n	434	84.9	93.2	0.0651367	0.0577242	0.0406516	0.0633403	0.059976	0.0440209	66	32	126	225	181	42	10	12	19
198	Serranidae: Niphon	n	y	1	NA	63.3	0	0	0	NA	NA	NA	0	0	1	1	0	0	0	0	0
199	Serranidae: Serraninae	n	n	87	63.7	77	0.0579988	0.0491453	0.0293735	0.059227	0.05487	0.0346967	48	10	3	7	4	24	8	0	2
200	Tripterygiidae, Blenniidae, Gobiesocidae, Dactyloscopidae, Chaenopsidae, Labrisomidae, Clinidae	n	n	1091	96.4	98.2	0.0712307	0.0641815	0.0478664	0.0653704	0.0623946	0.0482278	202	106	204	372	246	214	27	74	66

## Sheet: 3-genera
clade	genus	family	monophyletic?	monotypic (only one species sampled)?	total_rich	crown_age	stem_age	net_div_0_stem	net_div_0.5_stem	net_div_0.9_stem	net_div_0_crown	net_div_0.5_crown	net_div_0.9_crown	WA	EA	WI	CIP	CP	EP	NC	SC	FW
1	Abalistes	Balistidae	y	y	3	NA	18.3677	0.0598122	0.0377373	0.00992621	NA	NA	NA	0	1	1	2	2	0	0	0	0
2	Ablabys	Tetrarogidae	y	y	3	NA	56.9208	0.0193007	0.0121774	0.00320307	NA	NA	NA	0	0	3	2	1	0	0	0	0
3	Ablennes	Belonidae	y	y	1	NA	17.6079	0	0	0	NA	NA	NA	1	1	1	1	1	1	1	0	1
4	Aboma	Gobiidae	y	y	1	NA	39.2861	0	0	0	NA	NA	NA	0	0	0	0	0	1	0	0	0
5	Acanthaluteres	Monacanthidae	y	y	3	NA	10.5681	0.103956	0.0655886	0.0172521	NA	NA	NA	0	0	0	3	2	0	0	3	1
6	Acantharchus	Centrarchidae	y	y	1	NA	34.2766	0	0	0	NA	NA	NA	0	0	0	0	0	0	0	0	1
7	Acanthemblemaria	Chaenopsidae	y	n	21	14.7887	33.1435	0.0918588	0.0723489	0.0331471	0.158998	0.142318	0.0707346	11	0	0	0	0	10	0	0	0
8	Acanthistius	Serranidae	y	y	11	NA	31.0173	0.0773083	0.0577665	0.0223471	NA	NA	NA	2	0	3	3	5	1	0	3	1
9	Acanthochromis	Pomacentridae	y	y	1	NA	7.89532	0	0	0	NA	NA	NA	0	0	0	1	1	0	0	0	0
10	Acanthocybium	Scombridae	y	y	1	NA	21.1737	0	0	0	NA	NA	NA	1	0	0	0	0	1	1	0	0
11	Acanthogobius	Gobiidae	y	n	6	16.7645	56.4026	0.0317673	0.0222111	0.00718877	0.0655321	0.0562744	0.0208268	0	0	0	5	0	1	4	0	4
12	Acantholabrus	Labridae	y	y	1	NA	14.873	0	0	0	NA	NA	NA	0	1	0	0	0	0	1	0	0
13	Acanthostracion	Ostraciidae	y	n	4	7.62072	16.9887	0.0816011	0.0539354	0.0154435	0.0909556	0.0777858	0.0265805	3	2	0	0	0	0	1	0	0
14	Acarichthys	Cichlidae	y	y	1	NA	41.9435	0	0	0	NA	NA	NA	0	0	0	0	0	0	0	0	1
15	Acaronia	Cichlidae	y	n	2	9.62294	25.4288	0.0272583	0.0159451	0.00374811	0	0	0	0	0	0	0	0	0	0	0	2
16	Achiroides	Soleidae	y	y	2	NA	74.8355	0.00926228	0.00541808	0.00127359	NA	NA	NA	0	0	0	2	0	0	0	0	2
17	Achoerodus	Labridae	y	y	2	NA	43.517	0.0159282	0.0093174	0.00219018	NA	NA	NA	0	0	0	1	2	0	0	2	0
18	Acropoma	Acropomatidae	y	n	6	19.7393	49.0258	0.0365473	0.0255531	0.00827044	0.0556561	0.0477936	0.0176881	0	0	1	5	2	0	0	0	0
19	Adinia	Fundulidae	y	y	1	NA	16.4096	0	0	0	NA	NA	NA	1	0	0	0	0	0	0	0	1
20	Adrianichthys	Adrianichthyidae	y	y	4	NA	30.3311	0.0457054	0.0302096	0.00865001	NA	NA	NA	0	0	0	0	0	0	0	0	4
21	Aeoliscus	Centriscidae	y	y	2	NA	105.769	0.00655341	0.0038335	0.000901116	NA	NA	NA	0	0	2	1	1	0	0	0	0
22	Aesopia	Soleidae	y	y	1	NA	22.9565	0	0	0	NA	NA	NA	0	0	1	1	1	0	0	0	0
23	Aetapcus	Pataecidae	y	y	1	NA	41.6882	0	0	0	NA	NA	NA	0	0	0	1	0	0	0	0	0
24	Aethaloperca	Serranidae	y	y	1	NA	23.6993	0	0	0	NA	NA	NA	0	0	1	1	1	0	0	0	0
25	Aethotaxis	Nototheniidae	y	y	1	NA	18.6096	0	0	0	NA	NA	NA	0	0	0	0	0	0	0	1	0
26	Agonostomus	Mugilidae	y	y	3	NA	58.52	0.0187733	0.0118446	0.00311554	NA	NA	NA	1	0	1	0	0	1	0	0	3
27	Agonus	Agonidae	y	y	1	NA	15.5813	0	0	0	NA	NA	NA	0	1	0	0	0	0	1	0	0
28	Aidablennius	Blenniidae	y	y	1	NA	64.7885	0	0	0	NA	NA	NA	0	1	0	0	0	0	0	0	0
29	Akarotaxis	Bathydraconidae	y	y	1	NA	9.30882	0	0	0	NA	NA	NA	0	0	0	0	0	0	0	1	0
30	Alcolapia	Cichlidae	y	n	4	0.249731	3.67339	0.377388	0.24944	0.0714229	2.77558	2.37369	0.811122	0	0	0	0	0	0	0	0	4
31	Aldrichetta	Mugilidae	y	y	1	NA	20.0159	0	0	0	NA	NA	NA	0	0	0	1	1	0	0	1	1
32	Alectis	Carangidae	y	n	3	21.2461	22.7563	0.0482774	0.0304596	0.00801193	0.0190842	0.0165554	0.00554375	1	2	2	2	2	1	1	0	1
33	Alectrias	Stichaeidae	y	y	6	NA	2.14443	0.835541	0.584194	0.189078	NA	NA	NA	0	0	0	0	0	1	5	0	0
34	Alepes	Carangidae	y	n	5	1.92616	22.9418	0.0701532	0.047887	0.0146664	0.475709	0.407	0.144781	0	0	2	5	2	0	0	0	2
35	Alfaro	Poeciliidae	y	y	2	NA	22.4312	0.030901	0.0180759	0.004249	NA	NA	NA	0	0	0	0	0	0	0	0	2
36	Alloclinus	Labrisomidae	y	y	1	NA	76.3685	0	0	0	NA	NA	NA	0	0	0	0	0	1	0	0	0
37	Allodontichthys	Goodeidae	y	n	4	4.70177	13.9913	0.0990827	0.0654901	0.018752	0.147423	0.126077	0.0430821	0	0	0	0	0	0	0	0	4
38	Allomycterus	Diodontidae	y	y	1	NA	8.53368	0	0	0	NA	NA	NA	0	0	0	1	1	0	0	1	0
39	Alloophorus	Goodeidae	y	y	1	NA	5.9933	0	0	0	NA	NA	NA	0	0	0	0	0	0	0	0	1
40	Allothunnus	Scombridae	y	y	1	NA	25.0016	0	0	0	NA	NA	NA	0	1	1	1	0	0	0	1	0
41	Allotoca	Goodeidae	y	n	8	12.3051	13.7386	0.151357	0.109478	0.0386231	0.112661	0.0975884	0.038664	0	0	0	0	0	0	0	0	8
42	Alphestes	Serranidae	y	n	3	3.22518	8.81958	0.124565	0.0785919	0.0206724	0.125719	0.10906	0.0365198	3	0	0	0	0	3	0	0	0
43	Altolamprologus	Cichlidae	y	n	2	5.831	7.38309	0.0938831	0.0549181	0.0129093	0	0	0	0	0	0	0	0	0	0	0	2
44	Altrichthys	Pomacentridae	y	n	2	3.75668	7.89532	0.0877922	0.0513551	0.0120717	0	0	0	0	0	0	2	0	0	0	0	0
45	Aluterus	Monacanthidae	y	n	4	25.4426	35.7966	0.038727	0.0255972	0.00732931	0.0272436	0.0232989	0.00796154	4	3	2	2	2	2	4	1	0
46	Amanses	Monacanthidae	y	y	1	NA	13.2849	0	0	0	NA	NA	NA	0	0	1	1	1	0	0	0	0
47	Amatitlania	Cichlidae	y	y	4	NA	1.727	0.802719	0.530568	0.151919	NA	NA	NA	0	0	0	0	0	0	0	0	4
48	Ambloplites	Centrarchidae	y	n	4	12.3898	19.5151	0.0710371	0.046953	0.0134442	0.0559448	0.0478444	0.0163491	0	0	0	0	0	0	0	0	4
49	Amblyeleotris	Gobiidae	y	y	38	NA	52.2171	0.0696627	0.0568859	0.0296371	NA	NA	NA	1	0	11	25	17	0	0	0	5
50	Amblyglyphidodon	Pomacentridae	y	n	11	11.0254	25.1279	0.0954277	0.0713057	0.0275848	0.15462	0.135426	0.0579897	0	0	3	8	6	0	0	0	0
51	Amblypomacentrus	Pomacentridae	y	y	3	NA	14.7344	0.074561	0.0470428	0.0123739	NA	NA	NA	0	0	0	3	0	0	0	0	0
52	Ameca	Goodeidae	y	y	1	NA	5.5738	0	0	0	NA	NA	NA	0	0	0	0	0	0	0	0	1
53	Ammocrypta	Percidae	y	n	6	17.0371	27.4711	0.0652235	0.045603	0.0147597	0.0644836	0.055374	0.0204936	0	0	0	0	0	0	0	0	6
54	Ammotretis	Pleuronectidae	y	y	5	NA	45.4488	0.0354121	0.0241725	0.00740332	NA	NA	NA	0	0	0	2	2	0	0	4	1
55	Amphichaetodon	Chaetodontidae	y	n	2	20.1884	37.7627	0.0183553	0.0107372	0.00252392	0	0	0	0	0	0	1	2	1	0	0	0
56	Amphistichus	Embiotocidae	y	n	3	8.28511	14.9978	0.0732516	0.0462166	0.0121566	0.048939	0.0424542	0.0142162	0	0	0	0	0	3	3	0	1
57	Anabas	Anabantidae	y	y	2	NA	59.3797	0.0116731	0.00682835	0.0016051	NA	NA	NA	0	0	0	0	0	0	0	0	2
58	Anableps	Anablepidae	y	y	3	NA	39.1303	0.0280757	0.0177138	0.00465934	NA	NA	NA	0	0	0	0	0	1	0	0	3
59	Anacanthus	Monacanthidae	y	y	1	NA	22.9223	0	0	0	NA	NA	NA	0	0	0	1	1	0	0	0	1
60	Anampses	Labridae	y	n	12	21.16	49.6141	0.0500846	0.0377272	0.0149542	0.0846767	0.0743929	0.032532	0	0	4	8	10	0	0	0	0
61	Anarhichas	Anarhichadidae	y	n	4	2.30652	13.1127	0.105722	0.0698781	0.0200084	0.300516	0.257003	0.0878216	3	0	0	0	0	0	4	0	0
62	Anarrhichthys	Anarhichadidae	y	y	1	NA	13.1127	0	0	0	NA	NA	NA	0	0	0	0	0	0	1	0	0
63	Ancylopsetta	Paralichthyidae	y	y	7	NA	87.7914	0.0221652	0.0157908	0.00535364	NA	NA	NA	6	0	1	0	0	2	1	0	0
64	Andinoacara	Cichlidae	y	n	8	14.4908	21.4476	0.0969545	0.070128	0.0247407	0.0956672	0.0828685	0.0328321	0	0	0	0	0	0	0	0	8
65	Anoplarchus	Stichaeidae	y	y	2	NA	2.14443	0.323231	0.189078	0.0444455	NA	NA	NA	0	0	0	0	0	0	2	0	0
66	Anoplocapros	Aracanidae	y	y	3	NA	10.252	0.107161	0.0676109	0.017784	NA	NA	NA	0	0	0	1	2	0	0	1	0
67	Anoplopoma	Anoplopomatidae	y	y	1	NA	51.1435	0	0	0	NA	NA	NA	0	0	0	0	0	1	1	0	0
68	Antennatus	Antennariidae	y	y	12	NA	56.9556	0.0436289	0.0328643	0.0130266	NA	NA	NA	1	0	5	7	8	3	0	0	0
69	Anthias	Serranidae	y	y	9	NA	27.2896	0.0805151	0.0589762	0.0215389	NA	NA	NA	5	4	0	0	0	1	1	0	0
70	Antigonia	Caproidae	y	y	17	NA	73.2337	0.0386873	0.0300029	0.0130474	NA	NA	NA	2	2	10	3	7	2	2	1	0
71	Anyperodon	Serranidae	y	y	1	NA	15.693	0	0	0	NA	NA	NA	0	0	1	1	1	0	0	0	0
72	Apeltes	Gasterosteidae	y	y	1	NA	21.6452	0	0	0	NA	NA	NA	0	0	0	0	0	0	1	0	1
73	Aphanius	Cyprinodontidae	y	n	34	36.0159	55.8831	0.0631025	0.0512176	0.0261012	0.0786656	0.0713898	0.039054	0	1	1	1	0	0	0	0	34
74	Aphanopus	Trichiuridae	y	n	7	1.1265	37.0572	0.052511	0.0374096	0.0126832	1.11208	0.959164	0.367986	2	1	1	1	4	1	3	0	0
75	Aphareus	Lutjanidae	y	y	2	NA	29.8619	0.0232118	0.013578	0.0031917	NA	NA	NA	0	0	1	2	2	0	0	0	0
76	Aphia	Gobiidae	y	y	1	NA	32.4899	0	0	0	NA	NA	NA	0	1	0	0	0	0	1	0	1
77	Aphyolebias	Rivulidae	y	y	8	NA	8.57731	0.242435	0.175355	0.0618642	NA	NA	NA	0	0	0	0	0	0	0	0	8
78	Apistogrammoides	Cichlidae	y	y	1	NA	24.4783	0	0	0	NA	NA	NA	0	0	0	0	0	0	0	0	1
79	Apletodon	Gobiesocidae	y	n	6	6.57506	60.0412	0.0298422	0.0208651	0.00675312	0.167088	0.143483	0.0531023	0	6	1	0	0	0	0	0	0
80	Aploactisoma	Aploactinidae	y	y	1	NA	41.6882	0	0	0	NA	NA	NA	0	0	0	1	1	0	0	1	0
81	Aplocheilus	Aplocheilidae	y	n	7	45.6196	70.0604	0.0277748	0.0197871	0.00670855	0.0274611	0.023685	0.00908681	0	0	0	0	0	0	0	0	7
82	Aplodactylus	Aplodactylidae	y	n	5	22.9593	42.4956	0.037873	0.0258524	0.00791781	0.0399093	0.034145	0.0121463	0	0	0	2	2	1	0	1	0
83	Aplodinotus	Sciaenidae	y	y	1	NA	14.6248	0	0	0	NA	NA	NA	0	0	0	0	0	0	0	0	1
84	Apodichthys	Pholidae	y	y	2	NA	7.53233	0.0920229	0.05383	0.0126535	NA	NA	NA	0	0	0	0	0	1	2	0	0
85	Apogonichthyoides	Apogonidae	y	y	23	NA	29.4256	0.106557	0.0844471	0.0395285	NA	NA	NA	0	0	10	16	6	0	0	0	0
86	Aprion	Lutjanidae	y	y	1	NA	29.8619	0	0	0	NA	NA	NA	0	0	0	1	1	0	0	0	0
87	Apsilus	Lutjanidae	y	y	2	NA	48.0363	0.0144297	0.00844081	0.00198413	NA	NA	NA	1	1	0	0	0	0	0	0	0
88	Aptocyclus	Cyclopteridae	y	y	1	NA	17.8037	0	0	0	NA	NA	NA	0	0	0	0	0	0	1	0	0
89	Aracana	Aracanidae	y	y	2	NA	10.252	0.0676109	0.0395499	0.00929674	NA	NA	NA	0	0	0	2	2	0	0	2	0
90	Archiaphyosemion	Nothobranchiidae	y	y	1	NA	54.0767	0	0	0	NA	NA	NA	0	0	0	0	0	0	0	0	1
91	Archoplites	Centrarchidae	y	y	1	NA	16.2296	0	0	0	NA	NA	NA	0	0	0	0	0	0	0	0	1
92	Archosargus	Sparidae	y	y	3	NA	26.2494	0.0418529	0.0264062	0.00694574	NA	NA	NA	2	0	0	0	0	1	0	0	2
93	Arctoscopus	Trichodontidae	y	y	1	NA	24.7284	0	0	0	NA	NA	NA	0	0	0	0	0	0	1	0	0
94	Argyrops	Sparidae	y	n	4	1.22689	18.6811	0.0742084	0.0490491	0.0140444	0.564963	0.48316	0.165102	0	0	3	2	0	0	0	0	1
95	Argyrosomus	Sciaenidae	y	y	9	NA	1.47076	1.49394	1.09429	0.399648	NA	NA	NA	0	3	7	3	1	0	0	1	5
96	Argyrozona	Sparidae	y	y	1	NA	15.9488	0	0	0	NA	NA	NA	0	1	1	0	0	0	0	0	0
97	Ariomma	Ariommatidae	y	n	7	29.7865	35.4623	0.0548726	0.039092	0.0132536	0.0420581	0.0362747	0.0139169	3	2	3	2	3	0	3	0	0
98	Aristochromis	Cichlidae	y	y	1	NA	4.17309	0	0	0	NA	NA	NA	0	0	0	0	0	0	0	0	1
99	Arnoglossus	Bothidae	y	n	35	28.6848	51.7259	0.0687344	0.0558786	0.0286434	0.0997811	0.0906207	0.0498375	1	7	6	13	17	2	2	5	1
100	Arrhamphus	Hemiramphidae	y	y	1	NA	31.314	0	0	0	NA	NA	NA	0	0	0	1	1	0	0	0	1
101	Arripis	Arripidae	y	n	4	14.7694	29.0573	0.047709	0.0315339	0.0090292	0.0469313	0.0401359	0.013715	0	0	0	2	3	0	0	3	3
102	Artedidraco	Artedidraconidae	y	y	6	NA	7.07144	0.25338	0.177158	0.0573384	NA	NA	NA	0	0	0	0	0	0	0	6	0
103	Artediellus	Cottidae	y	y	15	NA	10.5999	0.255479	0.196176	0.0825922	NA	NA	NA	0	0	0	0	0	0	15	0	1
104	Aruma	Gobiidae	y	y	1	NA	37.5135	0	0	0	NA	NA	NA	0	0	0	0	0	1	0	0	0
105	Aseraggodes	Soleidae	y	n	50	3.49731	80.8773	0.0483699	0.0400443	0.0219462	0.920386	0.843144	0.492707	0	0	9	27	17	1	0	0	2
106	Aspasma	Gobiesocidae	y	y	1	NA	74.6259	0	0	0	NA	NA	NA	0	0	0	1	0	0	0	0	0
107	Aspidophoroides	Agonidae	y	y	2	NA	8.5211	0.0813448	0.0475837	0.0111852	NA	NA	NA	1	0	0	0	0	0	2	0	1
108	Asprocottus	Abyssocottidae	y	n	8	1.83767	3.86533	0.537973	0.38912	0.137279	0.754377	0.653453	0.258895	0	0	0	0	0	0	0	0	8
109	Assessor	Plesiopidae	y	y	3	NA	84.4835	0.0130039	0.00820453	0.00215807	NA	NA	NA	0	0	0	3	1	0	0	0	0
110	Assurger	Trichiuridae	y	y	1	NA	37.6696	0	0	0	NA	NA	NA	1	0	0	0	1	1	0	0	0
111	Astatoreochromis	Cichlidae	y	y	3	NA	9.78752	0.112246	0.0708195	0.018628	NA	NA	NA	0	0	0	0	0	0	0	0	3
112	Asterropteryx	Gobiidae	y	y	8	NA	15.3938	0.135083	0.0977067	0.0344703	NA	NA	NA	0	0	3	8	4	0	0	0	1
113	Astrabe	Gobiidae	y	y	3	NA	12.924	0.0850058	0.0536327	0.0141072	NA	NA	NA	0	0	0	2	0	0	1	0	0
114	Astronotus	Cichlidae	y	n	2	0.919305	44.3203	0.0156395	0.00914852	0.00215049	0	0	0	0	0	0	0	0	0	0	0	2
115	Ataeniobius	Goodeidae	y	y	1	NA	15.417	0	0	0	NA	NA	NA	0	0	0	0	0	0	0	0	1
116	Ataxolepis	Cetomimidae	y	y	2	NA	32.0433	0.0216315	0.0126536	0.00297441	NA	NA	NA	1	0	1	0	1	1	0	0	0
117	Atheresthes	Pleuronectidae	y	n	2	0.162896	54.1777	0.012794	0.00748399	0.00175921	0	0	0	0	0	0	0	0	1	2	0	0
118	Atherina	Atherinidae	y	n	5	25.8588	56.0579	0.0287103	0.0195978	0.00600223	0.0354344	0.0303165	0.0107844	0	5	1	0	0	0	2	0	4
119	Atherinason	Atherinidae	y	y	1	NA	21.7119	0	0	0	NA	NA	NA	0	0	0	1	1	0	0	1	0
120	Atherinella	Atherinopsidae	y	y	35	NA	22.3649	0.15897	0.129237	0.0662469	NA	NA	NA	5	0	0	0	0	12	0	0	24
121	Atherinops	Atherinopsidae	y	y	1	NA	14.3614	0	0	0	NA	NA	NA	0	0	0	0	0	1	1	0	1
122	Atherinosoma	Atherinidae	y	n	2	2.89165	23.7169	0.0292259	0.0170961	0.00401866	0	0	0	0	0	0	2	2	0	0	2	2
123	Atherion	Atherinidae	y	y	3	NA	55.7108	0.0197199	0.0124419	0.00327264	NA	NA	NA	0	0	1	2	2	0	0	0	0
124	Atlantirivulus	Rivulidae	y	n	15	20.737	40.2751	0.0672389	0.051631	0.0217372	0.0971647	0.0860254	0.0396583	0	0	0	0	0	0	0	0	15
125	Atropus	Carangidae	y	y	1	NA	20.1429	0	0	0	NA	NA	NA	0	0	0	1	0	0	0	0	0
126	Atule	Carangidae	y	y	1	NA	16.4532	0	0	0	NA	NA	NA	0	0	0	1	1	0	0	0	1
127	Atypichthys	Kyphosidae	y	n	2	9.70576	32.6598	0.0212233	0.0124148	0.00291828	0	0	0	0	0	0	0	2	0	0	1	1
128	Auchenionchus	Labrisomidae	y	y	3	NA	26.8455	0.0409235	0.0258199	0.00679151	NA	NA	NA	0	0	0	0	0	3	0	0	0
129	Aulichthys	Hypoptychidae	y	y	1	NA	37.4036	0	0	0	NA	NA	NA	0	0	0	1	0	0	1	0	0
130	Aulonocara	Cichlidae	y	y	22	NA	0.612831	5.04387	3.98535	1.84619	NA	NA	NA	0	0	0	0	0	0	0	0	22
131	Aulonocranus	Cichlidae	y	y	1	NA	2.80613	0	0	0	NA	NA	NA	0	0	0	0	0	0	0	0	1
132	Aulorhynchus	Aulorhynchidae	y	y	1	NA	37.4036	0	0	0	NA	NA	NA	0	0	0	0	0	0	1	0	0
133	Aulostomus	Aulostomidae	y	n	3	105.801	105.886	0.0103754	0.00654616	0.00172187	0.00383234	0.00332452	0.00111325	2	1	1	1	1	1	1	0	0
134	Aurigequula	Leiognathidae	y	y	1	NA	23.0426	0	0	0	NA	NA	NA	0	0	1	1	1	0	0	0	1
135	Australoheros	Cichlidae	y	n	28	6.21183	19.5818	0.170168	0.136563	0.0668136	0.424844	0.383522	0.202214	0	0	0	0	0	0	0	0	28
136	Austrofundulus	Rivulidae	y	y	7	NA	9.85828	0.197388	0.140622	0.047676	NA	NA	NA	0	0	0	0	0	0	0	0	7
137	Austroglossus	Soleidae	y	y	2	NA	70.1093	0.00988666	0.00578333	0.00135945	NA	NA	NA	0	2	2	0	0	0	0	0	0
138	Austrolabrus	Labridae	y	y	1	NA	5.85339	0	0	0	NA	NA	NA	0	0	0	1	1	0	0	0	0
139	Austrolycus	Zoarcidae	y	y	2	NA	2.78727	0.248683	0.14547	0.0341948	NA	NA	NA	0	0	0	0	0	0	0	2	1
140	Auxis	Scombridae	y	n	4	3.22862	5.77236	0.240161	0.158738	0.0454518	0.214688	0.183603	0.0627396	2	2	2	2	2	4	3	1	1
141	Awaous	Gobiidae	y	y	19	NA	50.7824	0.0579814	0.0453421	0.0202751	NA	NA	NA	0	1	2	3	2	0	0	0	19
142	Azurina	Pomacentridae	y	y	2	NA	10.196	0.0679823	0.0397671	0.0093478	NA	NA	NA	0	0	0	0	0	2	0	0	0
143	Babka	Gobiidae	y	y	1	NA	10.7895	0	0	0	NA	NA	NA	0	0	0	0	0	0	0	0	1
144	Badis	Badidae	y	n	22	21.4541	49.3748	0.0626036	0.0494654	0.0229145	0.111768	0.100186	0.0502897	0	0	0	0	0	0	0	0	22
145	Baileychromis	Cichlidae	y	y	1	NA	3.58076	0	0	0	NA	NA	NA	0	0	0	0	0	0	0	0	1
146	Balistapus	Balistidae	y	y	1	NA	15.7551	0	0	0	NA	NA	NA	0	0	0	1	1	0	0	0	0
147	Banjos	Banjosidae	y	y	1	NA	18.6923	0	0	0	NA	NA	NA	0	0	0	1	1	0	0	0	0
148	Barbulifer	Gobiidae	y	y	5	NA	37.5135	0.0429029	0.0292858	0.00896936	NA	NA	NA	3	0	0	0	0	3	0	0	0
149	Bathybates	Cichlidae	y	n	7	8.48677	10.7939	0.180279	0.128433	0.0435434	0.147614	0.127316	0.0488451	0	0	0	0	0	0	0	0	7
150	Bathydraco	Bathydraconidae	y	n	5	5.58183	9.30882	0.172894	0.118018	0.0361455	0.164156	0.140446	0.0499605	0	0	0	0	0	0	0	5	0
151	Bathymaster	Bathymasteridae	y	n	4	5.50774	17.9642	0.0771697	0.0510064	0.0146048	0.12585	0.107627	0.0367777	0	0	0	0	0	0	4	0	0
152	Bathysolea	Soleidae	y	y	4	NA	8.18525	0.169365	0.111944	0.0320533	NA	NA	NA	0	3	1	0	0	0	1	0	0
153	Batrachocottus	Cottocomephoridae	y	n	4	4.35481	5.60841	0.247181	0.163378	0.0467805	0.159168	0.136122	0.0465146	0	0	0	0	0	0	0	0	4
154	Bedotia	Bedotiidae	y	n	9	8.21784	17.4794	0.125704	0.0920763	0.0336274	0.183026	0.159179	0.064904	0	0	0	0	0	0	0	0	9
155	Bellator	Triglidae	y	y	8	NA	13.2331	0.157139	0.11366	0.0400986	NA	NA	NA	4	0	0	0	0	4	2	0	3
156	Belone	Belonidae	y	n	3	4.58981	8.50937	0.129106	0.0814569	0.021426	0.0883403	0.0766344	0.0256619	0	3	0	0	0	0	1	0	2
157	Belonesox	Poeciliidae	y	y	1	NA	21.4441	0	0	0	NA	NA	NA	0	0	0	0	0	0	0	0	1
158	Belonion	Belonidae	y	n	2	9.92746	29.0372	0.023871	0.0139637	0.00328235	0	0	0	0	0	0	0	0	0	0	0	2
159	Belonoperca	Serranidae	y	y	2	NA	57.6481	0.0120238	0.00703345	0.00165331	NA	NA	NA	0	0	1	1	2	0	0	0	0
160	Belontia	Osphronemidae	y	n	2	45.4002	66.3134	0.0104526	0.00611438	0.00143727	0	0	0	0	0	0	0	0	0	0	0	2
161	Bembras	Bembridae	y	y	5	NA	44.4096	0.0362408	0.0247382	0.00757657	NA	NA	NA	0	0	1	4	2	0	0	0	0
162	Bembrops	Percophidae	y	y	17	NA	76.5057	0.0370327	0.0287197	0.0124894	NA	NA	NA	9	4	4	5	5	1	1	0	0
163	Benthochromis	Cichlidae	y	n	3	1.4113	8.57991	0.128045	0.0807872	0.0212498	0.287299	0.249229	0.0834571	0	0	0	0	0	0	0	0	3
164	Benthodesmus	Trichiuridae	y	y	11	NA	66.271	0.0361832	0.0270369	0.0104593	NA	NA	NA	3	2	3	9	4	2	4	1	0
165	Benthophilus	Gobiidae	y	n	18	6.12527	15.6642	0.184521	0.143722	0.063409	0.358715	0.319518	0.153543	0	2	0	0	0	0	0	0	18
166	Bertella	Oneirodidae	y	y	1	NA	24.6987	0	0	0	NA	NA	NA	0	0	0	0	0	0	1	0	0
167	Betta	Osphronemidae	y	n	73	44.8709	48.6829	0.0881306	0.0741721	0.0432212	0.0801703	0.0740278	0.0457422	0	0	0	0	0	0	0	0	73
168	Bilabria	Zoarcidae	y	y	2	NA	13.3042	0.0520999	0.0304765	0.00716392	NA	NA	NA	0	0	0	0	0	0	2	0	0
169	Biotodoma	Cichlidae	y	n	2	15.8799	34.9596	0.0198271	0.0115981	0.0027263	0	0	0	0	0	0	0	0	0	0	0	2
170	Blepsias	Hemitripteridae	y	y	2	NA	21.7136	0.0319223	0.0186733	0.00438942	NA	NA	NA	0	0	0	0	0	0	2	0	0
171	Bolbometopon	Scaridae	y	y	1	NA	16.9276	0	0	0	NA	NA	NA	0	0	1	1	1	0	0	0	0
172	Boleophthalmus	Gobiidae	y	y	6	NA	23.9832	0.0747089	0.052235	0.0169062	NA	NA	NA	0	0	2	6	0	0	0	0	6
173	Bollmannia	Gobiidae	y	n	11	9.3674	54.5764	0.0439365	0.0328303	0.0127005	0.181987	0.159396	0.0682536	5	0	0	0	0	7	0	0	0
174	Boops	Sparidae	y	y	2	NA	18.0657	0.0383681	0.0224439	0.00527575	NA	NA	NA	0	1	1	0	0	0	1	0	0
175	Boopsoidea	Sparidae	y	y	1	NA	23.4415	0	0	0	NA	NA	NA	0	1	1	0	0	0	0	0	0
176	Bostockia	Percichthyidae	y	y	1	NA	36.2498	0	0	0	NA	NA	NA	0	0	0	0	0	0	0	0	1
177	Bostrychus	Eleotridae	y	y	9	NA	31.5597	0.0696212	0.0509966	0.0186246	NA	NA	NA	0	1	0	2	1	0	0	0	8
178	Bothrocara	Zoarcidae	y	n	8	7.69311	9.36407	0.222066	0.160622	0.0566664	0.180199	0.156092	0.0618427	0	0	0	0	0	3	7	0	0
179	Bothus	Bothidae	y	n	16	27.4108	47.4346	0.0584507	0.0451161	0.0193169	0.0758621	0.0673111	0.0314962	5	5	5	4	3	5	1	0	0
180	Boulengerochromis	Cichlidae	y	y	1	NA	14.7676	0	0	0	NA	NA	NA	0	0	0	0	0	0	0	0	1
181	Bovichtus	Bovichtidae	y	y	8	NA	24.6682	0.0842964	0.0609723	0.0215106	NA	NA	NA	0	2	0	3	1	1	0	6	0
182	Brachaluteres	Monacanthidae	y	y	4	NA	21.2472	0.065246	0.0431252	0.0123482	NA	NA	NA	0	0	1	2	2	0	0	1	1
183	Brachydeuterus	Haemulidae	y	y	1	NA	29.3766	0	0	0	NA	NA	NA	0	1	0	0	0	0	0	0	1
184	Brachygobius	Gobiidae	y	n	9	17.3757	33.7228	0.0651554	0.0477255	0.0174299	0.0865621	0.0752838	0.0306963	0	0	0	0	0	0	0	0	9
185	Brachyistius	Embiotocidae	y	y	2	NA	10.7704	0.0643567	0.0376462	0.00884927	NA	NA	NA	0	0	0	0	0	2	1	0	0
186	Brosmophycis	Bythitidae	y	y	1	NA	34.329	0	0	0	NA	NA	NA	0	0	0	0	0	1	1	0	0
187	Brotulotaenia	Ophidiidae	y	y	4	NA	33.0156	0.0419891	0.0277533	0.00794668	NA	NA	NA	2	2	1	0	1	1	1	1	0
188	Bryaninops	Gobiidae	y	n	16	17.2905	44.1071	0.0628604	0.0485198	0.0207742	0.120265	0.106709	0.0499312	0	0	9	13	8	0	0	0	1
189	Buenia	Gobiidae	y	y	2	NA	17.3673	0.0399111	0.0233465	0.00548791	NA	NA	NA	0	2	0	0	0	0	1	0	0
190	Buglossidium	Soleidae	y	y	1	NA	86.6611	0	0	0	NA	NA	NA	0	1	0	0	0	0	1	0	0
191	Bujurquina	Cichlidae	y	n	18	12.9356	21.4476	0.134764	0.104967	0.0463106	0.169859	0.151298	0.0727057	0	0	0	0	0	0	0	0	18
192	Cairnsichthys	Melanotaeniidae	y	y	1	NA	31.4361	0	0	0	NA	NA	NA	0	0	0	0	0	0	0	0	1
193	Callanthias	Callanthiidae	y	y	8	NA	82.6438	0.0251615	0.0181995	0.00642067	NA	NA	NA	0	2	1	2	3	2	0	2	0
194	Callochromis	Cichlidae	y	n	3	3.71029	8.73967	0.125704	0.0793105	0.0208614	0.109281	0.0948005	0.031745	0	0	0	0	0	0	0	0	3
195	Callogobius	Gobiidae	y	n	25	37.5737	49.8056	0.0646288	0.0514992	0.024571	0.0672207	0.0604856	0.0311772	0	0	9	17	10	0	0	3	8
196	Callopanchax	Nothobranchiidae	y	n	5	31.0529	36.9086	0.0436061	0.0297658	0.00911637	0.0295074	0.0252455	0.00898051	0	0	0	0	0	0	0	0	5
197	Calloplesiops	Plesiopidae	y	y	2	NA	84.4835	0.00820453	0.00479934	0.00112815	NA	NA	NA	0	0	1	2	1	0	0	0	0
198	Calotomus	Scaridae	y	n	5	0.611895	17.6814	0.0910244	0.0621338	0.0190297	1.49746	1.28118	0.455749	0	0	2	4	3	1	0	0	0
199	Calumia	Eleotridae	y	y	4	NA	33.9546	0.0408279	0.0269858	0.00772691	NA	NA	NA	0	0	1	4	2	0	0	0	0
200	Canthidermis	Balistidae	y	y	3	NA	19.4428	0.0565048	0.0356506	0.00937733	NA	NA	NA	2	1	2	1	1	1	1	0	0
201	Canthigaster	Tetraodontidae	y	n	37	14.897	34.9523	0.10331	0.0842416	0.0436611	0.195863	0.178135	0.0989508	3	3	15	16	21	4	0	0	1
202	Capros	Caproidae	y	y	1	NA	73.2337	0	0	0	NA	NA	NA	0	1	0	0	0	0	1	0	0
203	Caracanthus	Scorpaenidae	y	y	4	NA	38.0559	0.0364278	0.0240775	0.00689418	NA	NA	NA	0	0	3	2	3	0	0	0	0
204	Cardiopharynx	Cichlidae	y	y	1	NA	3.20894	0	0	0	NA	NA	NA	0	0	0	0	0	0	0	0	1
205	Careproctus	Liparidae	y	n	115	11.5626	14.8991	0.318471	0.27253	0.168983	0.35042	0.326205	0.213289	0	1	0	1	1	5	67	44	0
206	Carlhubbsia	Poeciliidae	y	n	2	1.54607	27.5094	0.0251967	0.0147391	0.00346464	0	0	0	0	0	0	0	0	0	0	0	2
207	Caspiosoma	Gobiidae	y	y	1	NA	15.6642	0	0	0	NA	NA	NA	0	0	0	0	0	0	0	0	1
208	Catathyridium	Achiridae	y	y	4	NA	22.7141	0.0610323	0.0403402	0.0115507	NA	NA	NA	1	0	0	0	0	0	0	0	4
209	Cebidichthys	Stichaeidae	y	y	1	NA	14.2654	0	0	0	NA	NA	NA	0	0	0	0	0	1	1	0	0
210	Centracanthus	Sparidae	y	y	1	NA	50.2799	0	0	0	NA	NA	NA	0	1	0	0	0	0	0	0	0
211	Centrarchops	Dinopercidae	y	y	1	NA	30.1904	0	0	0	NA	NA	NA	0	1	0	0	0	0	0	0	0
212	Centrarchus	Centrarchidae	y	y	1	NA	24.7766	0	0	0	NA	NA	NA	0	0	0	0	0	0	0	0	1
213	Centrogenys	Centrogenyidae	y	y	1	NA	54.4393	0	0	0	NA	NA	NA	0	0	0	1	1	0	0	0	1
214	Centrolophus	Centrolophidae	y	y	1	NA	8.94132	0	0	0	NA	NA	NA	0	0	0	1	1	0	0	0	0
215	Centropogon	Tetrarogidae	y	y	3	NA	41.7318	0.0263255	0.0166096	0.00436889	NA	NA	NA	0	0	0	2	2	0	0	1	2
216	Centropomus	Centropomidae	y	n	12	35.5081	75.5466	0.0328924	0.0247768	0.00982092	0.0504606	0.0443322	0.0193865	10	0	0	0	0	8	0	0	11
217	Centropristis	Serranidae	y	y	5	NA	63.7144	0.0252602	0.0172428	0.00528095	NA	NA	NA	5	0	0	0	0	0	3	0	0
218	Cepola	Cepolidae	y	n	5	8.26675	87.9676	0.0182958	0.0124888	0.00382496	0.110841	0.0948313	0.033734	0	2	1	2	2	0	0	2	0
219	Ceratias	Ceratiidae	y	y	3	NA	30.9333	0.0355155	0.0224078	0.00589402	NA	NA	NA	2	3	1	0	3	1	1	2	0
220	Cerdale	Microdesmidae	y	y	5	NA	25.3659	0.0634489	0.0433106	0.0132647	NA	NA	NA	2	0	0	0	0	3	0	0	2
221	Cetoscarus	Scaridae	y	y	2	NA	16.9276	0.0409478	0.0239529	0.00563046	NA	NA	NA	0	0	1	2	2	0	0	0	0
222	Cetostoma	Cetomimidae	y	y	1	NA	7.37407	0	0	0	NA	NA	NA	1	1	1	1	1	0	1	0	0
223	Chaenocephalus	Channichthyidae	y	y	1	NA	4.49651	0	0	0	NA	NA	NA	0	0	0	0	0	0	0	1	0
224	Chaenodraco	Channichthyidae	y	y	1	NA	11.0272	0	0	0	NA	NA	NA	0	0	0	0	0	0	0	1	0
225	Chaenogobius	Gobiidae	y	y	2	NA	29.0712	0.0238431	0.0139473	0.0032785	NA	NA	NA	0	0	0	1	0	0	1	0	2
226	Chaenopsis	Chaenopsidae	y	y	10	NA	33.1435	0.0694732	0.0514354	0.0193659	NA	NA	NA	6	0	0	0	0	4	0	0	0
227	Chaetobranchopsis	Cichlidae	y	y	2	NA	26.9956	0.0256763	0.0150197	0.00353058	NA	NA	NA	0	0	0	0	0	0	0	0	2
228	Chaetodipterus	Ephippidae	y	y	3	NA	25.8867	0.0424393	0.0267762	0.00704306	NA	NA	NA	2	1	0	0	0	1	1	0	2
229	Chaetodontoplus	Pomacanthidae	y	n	15	24.1069	49.8687	0.0543036	0.0416983	0.0175555	0.0835819	0.0739999	0.0341145	0	0	0	13	3	0	0	0	0
230	Chalinochromis	Cichlidae	y	n	3	3.44077	4.12529	0.266312	0.168024	0.0441961	0.117841	0.102226	0.0342316	0	0	0	0	0	0	0	0	3
231	Champsocephalus	Channichthyidae	y	y	2	NA	10.6332	0.0651873	0.0381321	0.00896349	NA	NA	NA	0	0	0	0	0	0	1	2	0
232	Champsodon	Champsodontidae	y	n	13	89.5856	89.6636	0.0286064	0.0217023	0.00879351	0.020894	0.0184079	0.0082054	0	0	3	10	7	0	0	0	0
233	Channa	Channidae	y	n	34	47.1409	71.2747	0.0494756	0.0401573	0.0204647	0.060101	0.0545422	0.0298375	0	0	0	0	0	0	0	0	34
234	Channichthys	Channichthyidae	y	y	9	NA	14.5767	0.150735	0.110412	0.0403237	NA	NA	NA	0	0	0	0	0	0	0	9	0
235	Chapalichthys	Goodeidae	y	y	3	NA	5.5738	0.197103	0.124358	0.0327105	NA	NA	NA	0	0	0	0	0	0	0	0	3
236	Characodon	Goodeidae	y	n	3	1.98835	18.7806	0.0584973	0.0369077	0.009708	0.20392	0.176899	0.0592366	0	0	0	0	0	0	0	0	3
237	Chasmodes	Blenniidae	y	y	3	NA	51.1962	0.0214589	0.013539	0.00356123	NA	NA	NA	3	0	0	0	0	0	0	0	2
238	Chaunax	Chaunacidae	y	n	19	11.5784	62.4883	0.0471198	0.0368483	0.016477	0.194439	0.173494	0.0843762	3	2	7	10	11	1	4	6	0
239	Cheilio	Labridae	y	y	1	NA	20.2082	0	0	0	NA	NA	NA	0	0	1	1	1	0	0	0	0
240	Cheilodipterus	Apogonidae	y	y	17	NA	11.3568	0.249472	0.193472	0.0841355	NA	NA	NA	0	0	9	13	7	0	0	0	0
241	Cheiloprion	Pomacentridae	y	y	1	NA	28.7566	0	0	0	NA	NA	NA	0	0	0	1	1	0	0	0	0
242	Cheilotrema	Sciaenidae	y	y	2	NA	11.8501	0.0584929	0.0342162	0.00804299	NA	NA	NA	0	0	0	0	0	2	0	0	0
243	Cheimarrichthys	Cheimarrichthyidae	y	y	1	NA	92.063	0	0	0	NA	NA	NA	0	0	0	0	0	0	0	1	1
244	Chelmon	Chaetodontidae	y	n	3	7.46041	22.0055	0.0499244	0.0314988	0.00828527	0.0543489	0.0471472	0.0157877	0	0	0	3	2	0	0	0	2
245	Chelmonops	Chaetodontidae	y	n	2	2.2503	24.4431	0.0283575	0.0165881	0.00389926	0	0	0	0	0	0	2	1	0	0	1	0
246	Chelonodon	Tetraodontidae	y	y	4	NA	23.4386	0.0591458	0.0390932	0.0111937	NA	NA	NA	0	0	2	2	2	0	0	0	3
247	Chilara	Ophidiidae	y	y	1	NA	35.928	0	0	0	NA	NA	NA	0	0	0	0	0	1	1	0	1
248	Chilatherina	Melanotaeniidae	y	y	11	NA	8.97828	0.267077	0.199566	0.0772027	NA	NA	NA	0	0	0	0	0	0	0	0	11
249	Chilochromis	Cichlidae	y	y	1	NA	15.4895	0	0	0	NA	NA	NA	0	0	0	0	0	0	0	0	1
250	Chirodactylus	Cheilodactylidae	y	n	3	4.90317	10.2301	0.10739	0.0677557	0.0178221	0.0826945	0.0717367	0.0240218	0	2	3	0	0	0	0	0	0
251	Chironemus	Chironemidae	y	n	6	17.6443	42.4956	0.0421634	0.0294798	0.00954133	0.0622644	0.0534683	0.0197883	0	0	0	3	5	0	0	2	0
252	Chitonotus	Cottidae	y	y	1	NA	25.112	0	0	0	NA	NA	NA	0	0	0	0	0	0	1	0	0
253	Chloroscombrus	Carangidae	y	n	2	9.59504	20.135	0.034425	0.0201373	0.00473356	0	0	0	2	1	0	0	0	2	1	0	2
254	Chlorurus	Scaridae	y	n	18	14.1943	25.0586	0.115344	0.089841	0.0396371	0.154796	0.137881	0.0662583	0	0	8	12	8	0	0	0	2
255	Chriodorus	Hemiramphidae	y	y	1	NA	38.9773	0	0	0	NA	NA	NA	1	0	0	0	0	0	0	0	1
256	Chriolepis	Gobiidae	y	y	10	NA	41.2756	0.0557856	0.0413016	0.0155504	NA	NA	NA	3	0	0	0	0	7	0	0	0
257	Chromogobius	Gobiidae	y	y	3	NA	43.356	0.0253393	0.0159873	0.00420522	NA	NA	NA	0	3	0	1	0	0	0	0	0
258	Cichla	Cichlidae	y	n	15	13.2756	52.0831	0.0519948	0.0399255	0.0168091	0.151775	0.134375	0.0619479	0	0	0	0	0	0	0	0	15
259	Cilus	Sciaenidae	y	y	1	NA	52.0554	0	0	0	NA	NA	NA	0	0	0	0	0	1	0	0	0
260	Cirrhilabrus	Labridae	y	y	48	NA	42.6157	0.0908398	0.0750586	0.040841	NA	NA	NA	0	0	5	34	20	0	0	0	0
261	Cirrhitops	Cirrhitidae	y	n	3	13.2484	44.2379	0.0248342	0.0156686	0.00412139	0.0306048	0.0265494	0.00889036	0	0	1	0	2	0	0	0	0
262	Citharoides	Citharidae	y	y	3	NA	86.1475	0.0127527	0.00804605	0.00211639	NA	NA	NA	0	0	1	3	0	0	0	0	0
263	Citharus	Citharidae	y	y	1	NA	86.0574	0	0	0	NA	NA	NA	0	1	0	0	0	0	0	0	0
264	Clariger	Gobiidae	y	n	6	5.92233	12.924	0.138638	0.0969333	0.0313731	0.185503	0.159297	0.0589549	0	0	0	4	0	0	2	0	0
265	Cleisthenes	Pleuronectidae	y	y	2	NA	4.11478	0.168453	0.0985387	0.0231629	NA	NA	NA	0	0	0	1	0	0	2	0	0
266	Cleithracara	Cichlidae	y	y	1	NA	29.1724	0	0	0	NA	NA	NA	0	0	0	0	0	0	0	0	1
267	Clepticus	Labridae	y	y	3	NA	32.3855	0.033923	0.021403	0.00562973	NA	NA	NA	2	1	0	0	0	0	0	0	0
268	Clevelandia	Gobiidae	y	y	1	NA	0.0607313	0	0	0	NA	NA	NA	0	0	0	0	0	1	1	0	1
269	Clidoderma	Pleuronectidae	y	y	1	NA	15.5422	0	0	0	NA	NA	NA	0	0	0	0	0	0	1	0	0
270	Clinitrachus	Clinidae	y	y	1	NA	70.2842	0	0	0	NA	NA	NA	0	1	0	0	0	0	0	0	0
271	Cnesterodon	Poeciliidae	y	n	10	10.9671	29.7325	0.0774433	0.0573361	0.0215876	0.146751	0.128103	0.0535955	0	0	0	0	0	0	0	0	10
272	Collichthys	Sciaenidae	y	n	2	0.2358	14.9971	0.0462187	0.0270362	0.00635524	0	0	0	0	0	0	2	0	0	2	0	0
273	Cololabis	Scomberesocidae	y	n	2	5.03229	30.8453	0.0224717	0.0131451	0.00308994	0	0	0	0	0	0	0	0	2	1	0	0
274	Comephorus	Comephoridae	y	n	2	1.75193	6.41882	0.107987	0.0631682	0.0148486	0	0	0	0	0	0	0	0	0	0	0	2
275	Congiopodus	Congiopodidae	y	y	6	NA	28.7568	0.0623073	0.0435641	0.0140998	NA	NA	NA	0	2	2	0	1	1	0	3	0
276	Congolapia	Cichlidae	y	y	3	NA	13.2069	0.0831847	0.0524837	0.013805	NA	NA	NA	0	0	0	0	0	0	0	0	3
277	Cookeolus	Priacanthidae	y	y	1	NA	30.8919	0	0	0	NA	NA	NA	1	1	1	1	1	1	1	0	0
278	Copadichromis	Cichlidae	y	y	25	NA	0.232825	13.8253	11.0166	5.2562	NA	NA	NA	0	0	0	0	0	0	0	0	25
279	Coradion	Chaetodontidae	y	n	3	5.6679	22.0055	0.0499244	0.0314988	0.00828527	0.0715371	0.0620578	0.0207807	0	0	0	3	1	0	0	0	0
280	Coryphaena	Coryphaenidae	y	n	2	8.46388	56.8175	0.0121995	0.00713627	0.00167748	0	0	0	2	2	0	0	1	2	2	0	1
281	Coryphoblennius	Blenniidae	y	y	1	NA	23.2175	0	0	0	NA	NA	NA	0	1	0	0	0	0	0	0	0
282	Corythoichthys	Syngnathidae	y	n	12	37.4396	96.947	0.0256316	0.0193075	0.00765302	0.0478573	0.0420452	0.0183863	0	0	8	10	9	0	0	0	0
283	Cottinella	Abyssocottidae	y	y	1	NA	3.43364	0	0	0	NA	NA	NA	0	0	0	0	0	0	0	0	1
284	Cottocomephorus	Cottocomephoridae	y	n	3	0.435789	4.02003	0.273285	0.172423	0.0453533	0.930416	0.807128	0.270275	0	0	0	0	0	0	0	0	3
285	Cottoperca	Bovichtidae	y	y	2	NA	24.6682	0.0280988	0.0164368	0.00386369	NA	NA	NA	0	0	0	0	0	1	0	2	0
286	Craterocephalus	Atherinidae	y	n	26	38.2794	50.27	0.064812	0.0517742	0.0249207	0.0670061	0.0603613	0.0313608	0	0	0	3	2	0	0	0	26
287	Cratinus	Serranidae	y	y	1	NA	12.5886	0	0	0	NA	NA	NA	0	0	0	0	0	1	0	0	0
288	Crenichthys	Goodeidae	y	y	2	NA	24.9392	0.0277935	0.0162581	0.0038217	NA	NA	NA	0	0	0	0	0	0	0	0	2
289	Crenicichla	Cichlidae	y	n	89	26.1252	30.0402	0.149421	0.126719	0.0759776	0.145281	0.134648	0.085389	0	0	0	0	0	0	0	0	89
290	Crenidens	Sparidae	y	y	1	NA	22.8771	0	0	0	NA	NA	NA	0	0	1	1	0	0	0	0	0
291	Cromileptes	Serranidae	y	y	1	NA	15.0795	0	0	0	NA	NA	NA	0	0	0	1	1	0	0	0	0
292	Crossorhombus	Bothidae	y	y	5	NA	39.3256	0.040926	0.0279363	0.00855607	NA	NA	NA	0	0	1	4	4	0	0	0	0
293	Cryodraco	Channichthyidae	y	y	3	NA	4.49651	0.244326	0.154152	0.0405473	NA	NA	NA	0	0	0	0	0	0	0	3	0
294	Cryothenia	Nototheniidae	y	y	2	NA	0.172289	4.02317	2.3534	0.553199	NA	NA	NA	0	0	0	0	0	0	0	2	0
295	Cryptacanthodes	Cryptacanthodidae	y	y	4	NA	41.7084	0.0332378	0.021969	0.00629044	NA	NA	NA	0	0	0	0	0	0	4	0	0
296	Cryptotomus	Scaridae	y	y	1	NA	12.6447	0	0	0	NA	NA	NA	1	0	0	0	0	0	0	0	0
297	Crystallaria	Percidae	y	y	2	NA	27.4711	0.0252319	0.0147597	0.00346947	NA	NA	NA	0	0	0	0	0	0	0	0	2
298	Crystallichthys	Liparidae	y	y	3	NA	15.5756	0.0705342	0.0445021	0.0117056	NA	NA	NA	0	0	0	0	0	0	3	0	0
299	Crystallogobius	Gobiidae	y	y	1	NA	58.0781	0	0	0	NA	NA	NA	0	0	0	0	0	0	1	0	0
300	Ctenogobiops	Gobiidae	y	y	9	NA	49.8056	0.044116	0.0323144	0.0118016	NA	NA	NA	0	0	3	7	6	0	0	0	0
301	Ctenolabrus	Labridae	y	y	1	NA	12.1127	0	0	0	NA	NA	NA	0	1	0	0	0	0	1	0	0
302	Ctenops	Osphronemidae	y	y	1	NA	47.4874	0	0	0	NA	NA	NA	0	0	0	0	0	0	0	0	1
303	Cualac	Cyprinodontidae	y	y	1	NA	30.5311	0	0	0	NA	NA	NA	0	0	0	0	0	0	0	0	1
304	Cubanichthys	Cyprinodontidae	y	y	2	NA	54.5934	0.0126965	0.007427	0.00174582	NA	NA	NA	0	0	0	0	0	0	0	0	2
305	Culaea	Gasterosteidae	y	y	1	NA	24.3007	0	0	0	NA	NA	NA	0	0	0	0	0	0	0	0	1
306	Cunningtonia	Cichlidae	y	y	1	NA	2.90743	0	0	0	NA	NA	NA	0	0	0	0	0	0	0	0	1
307	Cyathopharynx	Cichlidae	y	y	1	NA	4.0994	0	0	0	NA	NA	NA	0	0	0	0	0	0	0	0	1
308	Cybiosarda	Scombridae	y	y	1	NA	19.2478	0	0	0	NA	NA	NA	0	0	0	1	1	0	0	0	0
309	Cyclopharynx	Cichlidae	y	y	2	NA	0.426258	1.62612	0.95122	0.223597	NA	NA	NA	0	0	0	0	0	0	0	0	2
310	Cyclopsetta	Paralichthyidae	y	y	4	NA	71.5395	0.019378	0.0128082	0.0036674	NA	NA	NA	2	0	0	0	0	3	1	0	2
311	Cyclopterus	Cyclopteridae	y	y	1	NA	22.591	0	0	0	NA	NA	NA	1	1	0	0	0	0	1	0	0
312	Cymatoceps	Sparidae	y	y	1	NA	15.9488	0	0	0	NA	NA	NA	0	0	1	0	0	0	0	0	1
313	Cymatogaster	Embiotocidae	y	y	1	NA	2.46277	0	0	0	NA	NA	NA	0	0	0	0	0	0	1	0	1
314	Cymolutes	Labridae	y	n	3	6.23011	23.7639	0.0462303	0.0291681	0.00767221	0.0650815	0.0564577	0.0189055	0	0	3	3	3	0	0	0	0
315	Cynodonichthys	Rivulidae	y	n	27	31.0017	36.3595	0.0906459	0.0725824	0.0352297	0.0839531	0.0757096	0.0396327	0	0	0	0	0	0	0	0	27
316	Cynoglossus	Cynoglossidae	y	n	62	36.5175	54.6331	0.0755427	0.0631483	0.0358774	0.0940368	0.0865472	0.0522597	0	8	19	33	6	1	6	0	24
317	Cypho	Pseudochromidae	y	y	2	NA	48.0483	0.014426	0.0084387	0.00198363	NA	NA	NA	0	0	0	2	1	0	0	0	0
318	Cyphocottus	Abyssocottidae	y	y	2	NA	5.08266	0.136375	0.0797742	0.018752	NA	NA	NA	0	0	0	0	0	0	0	0	2
319	Cyphotilapia	Cichlidae	y	y	2	NA	1.66357	0.416662	0.243732	0.0572926	NA	NA	NA	0	0	0	0	0	0	0	0	2
320	Cyprichromis	Cichlidae	y	n	5	2.95668	6.21298	0.259044	0.176825	0.0541563	0.309905	0.265144	0.0943189	0	0	0	0	0	0	0	0	5
321	Cyprinodon	Cyprinodontidae	y	n	49	10.7975	16.7414	0.232467	0.19227	0.105001	0.296241	0.271255	0.158003	2	0	0	0	0	0	1	0	49
322	Cypselurus	Exocoetidae	y	n	12	10.594	11.9725	0.207551	0.156342	0.0619702	0.16913	0.148589	0.064978	2	1	5	9	4	2	2	0	0
323	Cyrtocara	Cichlidae	y	y	1	NA	3.39404	0	0	0	NA	NA	NA	0	0	0	0	0	0	0	0	1
324	Dacodraco	Channichthyidae	y	y	1	NA	2.82151	0	0	0	NA	NA	NA	0	0	0	0	0	0	0	1	0
325	Dactylophora	Cheilodactylidae	y	y	1	NA	8.74178	0	0	0	NA	NA	NA	0	0	0	1	1	0	0	1	0
326	Dactyloptena	Dactylopteridae	y	y	6	NA	24.3008	0.0737325	0.0515523	0.0166853	NA	NA	NA	1	2	4	6	3	0	0	0	0
327	Dactylopterus	Dactylopteridae	y	y	1	NA	24.3008	0	0	0	NA	NA	NA	1	1	0	0	0	0	1	0	1
328	Dario	Badidae	y	n	6	13.5574	52.5749	0.0340801	0.0238282	0.00771215	0.0810341	0.0695864	0.0257535	0	0	0	0	0	0	0	0	6
329	Dascyllus	Pomacentridae	y	n	10	17.6664	28.7712	0.0800309	0.0592519	0.0223089	0.0911018	0.0795249	0.0332715	0	1	6	7	8	0	1	0	0
330	Dasycottus	Psychrolutidae	y	y	1	NA	18.3901	0	0	0	NA	NA	NA	0	0	0	0	0	0	1	0	0
331	Datnioides	Datnioididae	y	y	5	NA	58.6468	0.0274429	0.0187327	0.00573727	NA	NA	NA	0	0	0	0	0	0	0	0	5
332	Davidijordania	Zoarcidae	y	y	5	NA	11.2639	0.142885	0.0975339	0.0298717	NA	NA	NA	0	0	0	1	1	0	5	0	0
333	Deltentosteus	Gobiidae	y	y	2	NA	17.3673	0.0399111	0.0233465	0.00548791	NA	NA	NA	0	2	0	0	0	0	0	0	0
334	Denariusa	Ambassidae	y	y	1	NA	46.826	0	0	0	NA	NA	NA	0	0	0	0	0	0	0	0	1
335	Dermogenys	Zenarchopteridae	y	n	13	7.40139	43.3902	0.0591136	0.0448468	0.0181713	0.252899	0.222807	0.0993172	0	0	0	1	0	0	0	0	13
336	Dexistes	Pleuronectidae	y	y	1	NA	38.6807	0	0	0	NA	NA	NA	0	0	0	0	0	0	1	0	0
337	Diagramma	Haemulidae	y	n	5	3.86122	10.804	0.148967	0.101686	0.0311433	0.237306	0.203031	0.0722235	0	0	3	4	1	0	0	0	1
338	Diancistrus	Bythitidae	y	y	28	NA	68.6598	0.0485321	0.0389478	0.0190553	NA	NA	NA	0	0	2	19	14	0	0	0	1
339	Diapterus	Gerreidae	y	n	4	14.9042	17.4088	0.0796317	0.0526337	0.0150708	0.0465068	0.0397729	0.0135909	4	1	0	0	0	2	0	0	3
340	Dibranchus	Ogcocephalidae	y	y	14	NA	30.693	0.0859823	0.0656469	0.0271367	NA	NA	NA	2	2	1	3	1	9	2	1	0
341	Dicentrarchus	Moronidae	y	n	2	29.5583	74	0.00936685	0.00547926	0.00128798	0	0	0	0	2	1	0	0	0	1	0	2
342	Dichistius	Dichistiidae	y	y	2	NA	42.2565	0.0164033	0.00959533	0.00225552	NA	NA	NA	0	1	2	0	0	0	0	0	0
343	Dichotomyctere	Tetraodontidae	y	n	6	10.7283	31.2763	0.0572881	0.0400547	0.012964	0.102403	0.0879367	0.0325448	0	0	0	1	0	0	0	0	5
344	Dimidiochromis	Cichlidae	y	y	4	NA	4.53874	0.305436	0.201882	0.0578055	NA	NA	NA	0	0	0	0	0	0	0	0	4
345	Dinolestes	Dinolestidae	y	y	1	NA	17.7767	0	0	0	NA	NA	NA	0	0	0	1	1	0	0	1	0
346	Dinoperca	Dinopercidae	y	y	1	NA	30.1904	0	0	0	NA	NA	NA	0	0	1	0	0	0	0	0	0
347	Diodon	Diodontidae	y	n	5	13.5481	15.196	0.105912	0.0722961	0.0221421	0.0676324	0.057864	0.0205838	4	3	4	5	4	3	2	1	0
348	Diplecogaster	Gobiesocidae	y	y	6	NA	66.6664	0.0268765	0.0187915	0.006082	NA	NA	NA	0	6	1	0	0	0	1	0	0
349	Diplectrum	Serranidae	y	n	12	7.92007	40.186	0.0618351	0.0465785	0.0184626	0.22623	0.198755	0.0869154	5	0	0	0	0	9	1	0	1
350	Diploprion	Serranidae	y	y	2	NA	62.1711	0.011149	0.00652176	0.00153303	NA	NA	NA	0	0	1	1	1	0	0	0	0
351	Diplospinus	Gempylidae	y	y	1	NA	16.3748	0	0	0	NA	NA	NA	1	1	0	0	1	0	1	0	0
352	Diproctacanthus	Labridae	y	y	1	NA	16.9987	0	0	0	NA	NA	NA	0	0	0	1	0	0	0	0	0
353	Dipterygonotus	Caesionidae	y	y	1	NA	6.54552	0	0	0	NA	NA	NA	0	0	1	1	1	0	0	0	0
354	Dischistodus	Pomacentridae	y	n	7	17.2181	33.5413	0.0580154	0.041331	0.0140127	0.0727585	0.0627537	0.0240757	0	0	0	7	5	0	0	0	2
355	Discotrema	Gobiesocidae	y	n	3	5.34397	55.891	0.0196563	0.0124018	0.00326209	0.0758734	0.0658195	0.0220404	0	0	0	2	3	0	0	0	0
356	Dissostichus	Nototheniidae	y	n	2	14.5004	18.6096	0.0372468	0.021788	0.00512156	0	0	0	0	0	0	0	0	0	0	2	0
357	Ditrema	Embiotocidae	y	n	3	1.82296	8.79389	0.124929	0.0788215	0.0207328	0.222421	0.192948	0.0646109	0	0	0	3	0	0	2	0	0
358	Ditropichthys	Cetomimidae	y	y	1	NA	7.37407	0	0	0	NA	NA	NA	1	1	1	0	1	1	1	0	0
359	Doederleinia	Acropomatidae	y	y	1	NA	49.1504	0	0	0	NA	NA	NA	0	0	0	1	1	0	0	0	0
360	Dolloidraco	Artedidraconidae	y	y	1	NA	17.3832	0	0	0	NA	NA	NA	0	0	0	0	0	0	0	1	0
361	Dormitator	Eleotridae	y	n	5	13.4165	29.6235	0.0543298	0.0370858	0.0113583	0.0682958	0.0584316	0.0207857	2	1	0	0	0	2	0	0	5
362	Doryrhamphus	Syngnathidae	y	y	7	NA	45.88	0.042413	0.0302157	0.0102442	NA	NA	NA	0	0	3	5	3	1	0	0	0
363	Draconetta	Draconettidae	y	y	1	NA	89.6636	0	0	0	NA	NA	NA	0	0	0	1	1	0	0	0	0
364	Drepane	Drepaneidae	y	n	3	19.7838	55.7989	0.0196888	0.0124222	0.00326748	0.0204948	0.0177791	0.00595351	0	2	2	2	2	0	0	0	3
365	Drombus	Gobiidae	y	n	10	29.4459	47.3023	0.0486781	0.0360394	0.0135692	0.0546575	0.0477118	0.0199616	0	0	2	10	5	0	0	0	6
366	Dunckerocampus	Syngnathidae	y	y	7	NA	45.88	0.042413	0.0302157	0.0102442	NA	NA	NA	0	0	2	4	4	0	0	0	0
367	Echeneis	Echeneidae	y	n	2	4.13583	8.32768	0.0832341	0.0486888	0.011445	0	0	0	2	1	1	1	1	1	1	1	1
368	Echiichthys	Trachinidae	y	y	1	NA	27.2285	0	0	0	NA	NA	NA	0	1	0	0	0	0	1	0	0
369	Echinophryne	Antennariidae	y	y	3	NA	8.08031	0.135962	0.0857823	0.0225637	NA	NA	NA	0	0	0	3	2	0	0	3	0
370	Echiodon	Carapidae	y	y	13	NA	48.8869	0.052467	0.0398043	0.0161282	NA	NA	NA	1	3	1	2	3	1	2	4	0
371	Economidichthys	Gobiidae	y	y	2	NA	14.4323	0.0480274	0.0280942	0.00660394	NA	NA	NA	0	0	0	0	0	0	0	0	2
372	Ecsenius	Blenniidae	y	n	53	36.6736	82.8562	0.0479179	0.0397778	0.0220207	0.0893598	0.081967	0.0483393	0	0	10	41	14	0	0	0	0
373	Ectodus	Cichlidae	y	y	1	NA	4.01621	0	0	0	NA	NA	NA	0	0	0	0	0	0	0	0	1
374	Elacatinus	Gobiidae	y	n	26	29.8307	36.4088	0.0894865	0.0714852	0.0344083	0.0859835	0.0774568	0.0402429	25	0	0	0	0	1	0	0	0
375	Elassodiscus	Liparidae	y	n	3	8.27343	34.8948	0.0314836	0.0198639	0.0052249	0.0490081	0.0425141	0.0142363	0	0	0	0	0	0	3	0	0
376	Elassoma	Elassomatidae	y	n	7	13.3985	54.5193	0.0356921	0.0254276	0.00862087	0.0935002	0.0806432	0.030939	0	0	0	0	0	0	0	0	7
377	Elates	Platycephalidae	y	y	1	NA	20.0284	0	0	0	NA	NA	NA	0	0	0	1	1	0	0	0	0
378	Eleginops	Eleginopsidae	y	y	1	NA	43.0837	0	0	0	NA	NA	NA	0	0	0	0	0	0	0	1	0
379	Eleutheronema	Polynemidae	y	y	3	NA	47.9946	0.0228903	0.0144422	0.00379879	NA	NA	NA	0	0	1	3	1	0	0	0	3
380	Embassichthys	Pleuronectidae	y	y	1	NA	6.06583	0	0	0	NA	NA	NA	0	0	0	0	0	0	1	0	0
381	Embiotoca	Embiotocidae	y	n	2	2.35932	14.8497	0.0466775	0.0273046	0.00641831	0	0	0	0	0	0	0	0	1	2	0	0
382	Emmelichthys	Emmelichthyidae	y	y	6	NA	19.3185	0.0927484	0.0648478	0.0209884	NA	NA	NA	1	1	2	2	3	2	0	1	0
383	Encheliophis	Carapidae	y	y	7	NA	48.8869	0.0398043	0.0283572	0.0096141	NA	NA	NA	1	0	4	5	6	1	0	0	0
384	Enneacanthus	Centrarchidae	y	n	3	13.434	21.9858	0.0499693	0.0315271	0.00829271	0.030182	0.0261826	0.00876753	0	0	0	0	0	0	0	0	3
385	Enophrys	Cottidae	y	y	4	NA	13.0093	0.106562	0.0704335	0.0201674	NA	NA	NA	0	0	0	0	0	0	4	0	0
386	Enoplosus	Enoplosidae	y	y	1	NA	66.2986	0	0	0	NA	NA	NA	0	0	0	1	1	0	0	1	1
387	Entelurus	Syngnathidae	y	y	1	NA	29.712	0	0	0	NA	NA	NA	0	1	0	0	0	0	1	0	1
388	Eopsetta	Pleuronectidae	y	n	2	5.98535	13.8841	0.0499236	0.0292035	0.00686467	0	0	0	0	0	0	1	0	0	2	0	0
389	Epibulus	Labridae	y	n	2	1.99098	14.7313	0.0470527	0.0275241	0.00646991	0	0	0	0	0	1	2	2	1	0	0	0
390	Epigonus	Epigonidae	y	n	37	26.2391	33.9016	0.106512	0.0868524	0.0450142	0.111199	0.101135	0.0561784	8	9	9	6	15	6	4	3	1
391	Eretmodus	Cichlidae	y	y	2	NA	1.46949	0.471692	0.275922	0.0648594	NA	NA	NA	0	0	0	0	0	0	0	0	2
392	Ernogrammus	Stichaeidae	y	y	3	NA	14.2654	0.0770124	0.0485894	0.0127807	NA	NA	NA	0	0	0	0	0	0	3	0	0
393	Erotelis	Eleotridae	y	y	4	NA	25.7638	0.0538079	0.0355651	0.0101835	NA	NA	NA	1	0	0	0	0	2	0	0	3
394	Erythrocles	Emmelichthyidae	y	n	6	12.0946	19.3185	0.0927484	0.0648478	0.0209884	0.0908349	0.0780027	0.0288683	1	2	2	2	2	1	1	0	0
395	Esselenichthys	Stichaeidae	y	y	2	NA	12.1866	0.0568778	0.0332714	0.0078209	NA	NA	NA	0	0	0	0	0	1	2	0	0
396	Etelis	Lutjanidae	y	y	4	NA	7.57739	0.182952	0.120924	0.0346246	NA	NA	NA	1	0	2	3	3	0	0	0	0
397	Etia	Cichlidae	y	y	1	NA	29.4634	0	0	0	NA	NA	NA	0	0	0	0	0	0	0	0	1
398	Etroplus	Cichlidae	y	n	3	10.0213	27.6563	0.0397238	0.0250629	0.00659241	0.0404603	0.035099	0.0117533	0	0	0	0	0	0	0	0	3
399	Eubleekeria	Leiognathidae	y	n	4	9.58334	15.7479	0.0880306	0.0581851	0.0166603	0.0723284	0.0618556	0.0211369	0	0	0	4	1	0	0	0	1
400	Eucyclogobius	Gobiidae	y	y	1	NA	31.1309	0	0	0	NA	NA	NA	0	0	0	0	0	0	1	0	1
401	Eugerres	Gerreidae	y	y	7	NA	17.4088	0.111777	0.0796317	0.026998	NA	NA	NA	2	0	0	0	0	3	0	0	4
402	Euleptorhamphus	Hemiramphidae	y	y	2	NA	37.8596	0.0183084	0.0107097	0.00251746	NA	NA	NA	1	1	1	1	1	1	1	0	0
403	Eumicrotremus	Cyclopteridae	y	n	15	17.6308	17.8037	0.152106	0.116798	0.0491734	0.114283	0.101181	0.0466453	1	0	0	1	0	0	15	0	0
404	Eutaeniichthys	Gobiidae	y	y	1	NA	45.7088	0	0	0	NA	NA	NA	0	0	0	0	0	0	0	0	1
405	Euthynnus	Scombridae	y	n	3	2.49663	5.77236	0.190323	0.12008	0.0315853	0.162405	0.140885	0.0471768	1	2	2	2	2	2	1	0	1
406	Eutrigla	Triglidae	y	y	1	NA	10.0241	0	0	0	NA	NA	NA	0	1	0	0	0	0	1	0	1
407	Evermannichthys	Gobiidae	y	y	5	NA	7.1956	0.22367	0.152678	0.0467608	NA	NA	NA	5	0	0	0	0	0	0	0	0
408	Evorthodus	Gobiidae	y	y	2	NA	59.4709	0.0116552	0.00681787	0.00160264	NA	NA	NA	1	0	0	0	0	1	0	0	1
409	Exocoetus	Exocoetidae	y	n	5	10.332	22.5307	0.0714331	0.0487607	0.0149339	0.0886847	0.0758756	0.026991	2	2	1	1	4	5	2	0	0
410	Exyrias	Gobiidae	y	y	5	NA	57.5706	0.0279559	0.0190829	0.00584452	NA	NA	NA	0	0	1	4	4	0	0	0	2
411	Fenerbahce	Nothobranchiidae	y	y	2	NA	62.3405	0.0111187	0.00650404	0.00152886	NA	NA	NA	0	0	0	0	0	0	0	0	2
412	Fistularia	Fistulariidae	y	n	4	21.8882	103.419	0.0134046	0.00885996	0.0025369	0.0316676	0.0270823	0.0092544	3	2	2	2	2	4	3	2	2
413	Floridichthys	Cyprinodontidae	y	y	2	NA	26.8136	0.0258506	0.0151216	0.00355455	NA	NA	NA	1	0	0	0	0	0	0	0	2
414	Fluviphylax	Poeciliidae	y	y	5	NA	54.7744	0.029383	0.020057	0.00614287	NA	NA	NA	0	0	0	0	0	0	0	0	5
415	Fodiator	Exocoetidae	y	n	2	1.30296	35.0731	0.0197629	0.0115606	0.00271747	0	0	0	1	1	0	0	0	2	0	0	1
416	Foerschichthys	Nothobranchiidae	y	y	1	NA	57.1589	0	0	0	NA	NA	NA	0	0	0	0	0	0	0	0	1
417	Forcipiger	Chaetodontidae	y	n	3	15.8772	30.3857	0.0361556	0.0228116	0.00600024	0.0255376	0.0221536	0.00741838	0	0	0	3	2	1	0	0	0
418	Forsterygion	Tripterygiidae	y	y	8	NA	42.8745	0.0485006	0.0350809	0.0123763	NA	NA	NA	0	0	0	0	4	0	0	5	1
419	Fowleria	Apogonidae	y	y	7	NA	71.1043	0.027367	0.0194966	0.00661006	NA	NA	NA	0	0	4	7	7	0	0	0	1
420	Fowlerichthys	Antennariidae	y	y	5	NA	43.4541	0.0370377	0.0252821	0.00774316	NA	NA	NA	2	1	1	1	0	1	1	0	1
421	Freemanichthys	Agonidae	y	y	1	NA	10.5403	0	0	0	NA	NA	NA	0	0	0	0	0	0	1	0	0
422	Gadopsis	Percichthyidae	y	n	2	6.85192	34.9547	0.0198299	0.0115997	0.00272668	0	0	0	0	0	0	0	0	0	0	0	2
423	Garmanella	Cyprinodontidae	y	y	1	NA	26.8136	0	0	0	NA	NA	NA	0	0	0	0	0	0	0	0	1
424	Gasterochisma	Scombridae	y	y	1	NA	55	0	0	0	NA	NA	NA	0	0	1	1	1	0	0	1	0
425	Gasterosteus	Gasterosteidae	y	n	6	16.5848	30.4931	0.0587596	0.0410836	0.013297	0.0662421	0.0568841	0.0210524	1	1	0	1	0	1	2	0	6
426	Gempylus	Gempylidae	y	y	1	NA	11.3557	0	0	0	NA	NA	NA	1	1	1	1	1	1	1	0	0
427	Genicanthus	Pomacanthidae	y	n	10	6.73087	18.4647	0.124702	0.0923245	0.034761	0.239113	0.208727	0.087327	0	0	1	6	5	0	0	0	0
428	Genyatremus	Haemulidae	y	n	4	26.5891	31.17	0.0444753	0.0293966	0.00841721	0.0260688	0.0222942	0.00761824	2	0	0	0	0	2	0	0	1
429	Gerlachea	Bathydraconidae	y	y	1	NA	8.9878	0	0	0	NA	NA	NA	0	0	0	0	0	0	0	1	0
430	Gibbonsia	Clinidae	y	y	3	NA	31.5985	0.0347679	0.0219361	0.00576994	NA	NA	NA	0	1	0	0	0	2	3	0	0
431	Gigantactis	Gigantactinidae	y	y	20	NA	44.7649	0.0669215	0.0525272	0.0237845	NA	NA	NA	7	6	1	4	10	3	5	1	0
432	Gillellus	Dactyloscopidae	y	y	10	NA	66.0929	0.0348386	0.0257932	0.00971139	NA	NA	NA	5	0	0	0	0	5	0	0	0
433	Gillichthys	Gobiidae	y	n	3	16.7482	32.3168	0.0339951	0.0214485	0.0056417	0.0242095	0.0210015	0.00703258	0	0	0	0	0	3	0	0	2
434	Ginsburgellus	Gobiidae	y	y	1	NA	32.126	0	0	0	NA	NA	NA	1	0	0	0	0	0	0	0	0
435	Girardinichthys	Goodeidae	y	n	3	8.4112	11.6023	0.0946892	0.0597422	0.0157143	0.0482054	0.0418177	0.0140031	0	0	0	0	0	0	0	0	3
436	Girardinus	Poeciliidae	y	n	7	15.6159	23.9801	0.0811469	0.0578102	0.0195997	0.0802233	0.069192	0.0265457	0	0	0	0	0	0	0	0	7
437	Girella	Kyphosidae	y	n	18	15.1575	26.1295	0.110617	0.0861589	0.0380126	0.144959	0.12912	0.0620479	0	2	1	6	8	6	2	3	2
438	Glaucosoma	Glaucosomatidae	y	n	4	24.0891	71.7257	0.0193277	0.0127749	0.00365788	0.0287743	0.0246079	0.00840887	0	0	0	3	1	0	0	0	0
439	Glyptocephalus	Pleuronectidae	y	n	3	6.8841	9.58433	0.114626	0.0723209	0.0190229	0.0588988	0.0510942	0.0171094	1	0	0	1	0	1	3	0	0
440	Gnathanacanthus	Gnathanacanthidae	y	y	1	NA	51.9688	0	0	0	NA	NA	NA	0	0	0	1	0	0	0	1	0
441	Gnathanodon	Carangidae	y	y	1	NA	32.2166	0	0	0	NA	NA	NA	1	0	1	1	1	1	0	0	0
442	Gnathodentex	Lethrinidae	y	y	1	NA	24.0526	0	0	0	NA	NA	NA	0	0	1	1	1	0	0	0	0
443	Gnatholebias	Rivulidae	y	y	1	NA	5.64414	0	0	0	NA	NA	NA	0	0	0	0	0	0	0	0	1
444	Gobiesox	Gobiesocidae	y	n	28	49.5755	82.121	0.0405768	0.0325635	0.0159318	0.0532331	0.0480555	0.0253374	5	0	0	0	0	15	4	0	9
445	Gobiomorus	Eleotridae	y	y	3	NA	29.008	0.0378727	0.023895	0.00628522	NA	NA	NA	1	0	0	0	0	2	0	0	3
446	Gobionotothen	Nototheniidae	y	n	5	11.602	18.469	0.0871427	0.0594841	0.0182182	0.078977	0.06757	0.0240364	0	0	0	0	0	0	0	5	0
447	Gobiosoma	Gobiidae	y	n	18	34.5713	40.2814	0.0717544	0.0558891	0.0246578	0.0635563	0.0566115	0.0272044	11	0	0	1	0	7	1	0	6
448	Gobiusculus	Gobiidae	y	y	1	NA	25.8719	0	0	0	NA	NA	NA	0	1	0	0	0	0	1	0	1
449	Gobulus	Gobiidae	y	y	4	NA	26.9542	0.0514315	0.0339944	0.00973371	NA	NA	NA	1	0	0	0	0	3	0	0	0
450	Gomphosus	Labridae	y	n	2	9.04053	16.2812	0.0425736	0.0249039	0.00585402	0	0	0	0	0	1	2	1	0	0	0	0
451	Goodea	Goodeidae	y	n	3	1.36165	15.0236	0.073126	0.0461374	0.0121357	0.297775	0.258317	0.0865002	0	0	0	0	0	0	0	0	3
452	Gouania	Gobiesocidae	y	y	1	NA	52.3278	0	0	0	NA	NA	NA	0	1	0	0	0	0	0	0	0
453	Gracila	Serranidae	y	y	1	NA	13.7119	0	0	0	NA	NA	NA	0	0	1	1	1	0	0	0	0
454	Gramma	Grammatidae	y	y	5	NA	101.824	0.015806	0.0107893	0.00330444	NA	NA	NA	5	0	0	0	1	0	0	0	0
455	Grammatorcynus	Scombridae	y	n	2	19.3824	45.9025	0.0151004	0.00883319	0.00207636	0	0	0	0	0	1	2	2	0	0	0	0
456	Grammatotria	Cichlidae	y	y	1	NA	9.29874	0	0	0	NA	NA	NA	0	0	0	0	0	0	0	0	1
457	Grammistes	Serranidae	y	y	1	NA	11.8883	0	0	0	NA	NA	NA	0	0	1	1	1	0	0	0	0
458	Grammoplites	Platycephalidae	y	y	3	NA	49.6565	0.0221242	0.0139588	0.00367165	NA	NA	NA	0	0	1	3	0	0	0	0	1
459	Graus	Kyphosidae	y	y	1	NA	26.1295	0	0	0	NA	NA	NA	0	0	0	0	0	1	0	0	0
460	Guavina	Eleotridae	y	y	2	NA	29.6235	0.0233986	0.0136873	0.00321738	NA	NA	NA	1	1	0	0	0	2	0	0	1
461	Guianacara	Cichlidae	y	n	7	4.85337	44.8789	0.0433591	0.0308897	0.0104727	0.258122	0.222628	0.0854122	0	0	0	0	0	0	0	0	7
462	Gunnellichthys	Microdesmidae	y	y	7	NA	61.2266	0.0317821	0.022642	0.00767646	NA	NA	NA	0	0	4	4	5	0	0	0	0
463	Gymnachirus	Achiridae	y	y	3	NA	22.7141	0.048367	0.0305162	0.0080268	NA	NA	NA	3	0	1	0	0	0	2	0	0
464	Gymnapistes	Tetrarogidae	y	y	1	NA	41.7318	0	0	0	NA	NA	NA	0	0	0	1	1	0	0	1	1
465	Gymnelopsis	Zoarcidae	y	y	5	NA	23.0204	0.0699136	0.0477234	0.0146163	NA	NA	NA	0	0	0	0	0	0	5	0	0
466	Gymnocaesio	Caesionidae	y	y	1	NA	17.9791	0	0	0	NA	NA	NA	0	0	1	1	1	0	0	0	0
467	Gymnocanthus	Cottidae	y	n	7	9.40795	22.0646	0.0881917	0.062829	0.0213013	0.13316	0.114849	0.0440624	0	1	0	0	0	0	6	0	0
468	Gymnocephalus	Percidae	y	n	5	8.45816	30.5205	0.0527331	0.0359959	0.0110245	0.108332	0.0926853	0.0329706	0	0	0	0	0	0	0	0	5
469	Gymnocranius	Lethrinidae	y	n	10	27.7233	31.601	0.0728644	0.0539461	0.0203112	0.0580536	0.0506764	0.0212019	0	0	3	8	7	0	0	0	0
470	Gymnocrotaphus	Sparidae	y	y	1	NA	23.4415	0	0	0	NA	NA	NA	0	1	1	0	0	0	0	0	0
471	Gymnodraco	Bathydraconidae	y	y	1	NA	12.7466	0	0	0	NA	NA	NA	0	0	0	0	0	0	0	1	0
472	Gymnogeophagus	Cichlidae	y	n	11	14.0665	32.5676	0.0736282	0.0550166	0.0212833	0.121192	0.106148	0.0454525	0	0	0	0	0	0	0	0	11
473	Gymnogobius	Gobiidae	y	n	16	8.85983	34.9011	0.0794412	0.061318	0.0262539	0.234704	0.208249	0.0974438	0	0	0	6	0	0	6	0	15
474	Gymnosarda	Scombridae	y	y	1	NA	21.1737	0	0	0	NA	NA	NA	0	0	1	1	1	0	0	1	0
475	Hadropareia	Zoarcidae	y	y	2	NA	3.86908	0.17915	0.104796	0.0246338	NA	NA	NA	0	0	0	0	0	0	2	0	0
476	Haletta	Odacidae	y	y	1	NA	2.69014	0	0	0	NA	NA	NA	0	0	0	1	1	0	0	1	1
477	Halieutichthys	Ogcocephalidae	y	y	4	NA	25.8645	0.0535983	0.0354266	0.0101438	NA	NA	NA	4	1	1	0	0	0	1	0	0
478	Haliichthys	Syngnathidae	y	y	1	NA	82.6857	0	0	0	NA	NA	NA	0	0	0	1	0	0	0	0	0
479	Halobatrachus	Batrachoididae	y	y	1	NA	41.2782	0	0	0	NA	NA	NA	0	1	0	0	0	0	0	0	0
480	Hapalogenys	Hapalogenyidae	y	n	8	26.9584	47.9738	0.0433453	0.031352	0.0110608	0.0514235	0.0445438	0.017648	0	0	0	8	0	0	1	0	1
481	Harpagifer	Harpagiferidae	y	n	11	5.00876	17.4453	0.137452	0.102707	0.0397325	0.340353	0.298103	0.127648	0	0	0	0	0	0	0	11	0
482	Helicolenus	Sebastidae	y	n	9	2.06192	13.054	0.168318	0.123291	0.0450273	0.729454	0.634413	0.258677	2	2	2	5	5	1	2	2	0
483	Helostoma	Helostomatidae	y	y	1	NA	68.7511	0	0	0	NA	NA	NA	0	0	0	0	0	0	0	0	1
484	Hemanthias	Serranidae	y	n	3	25.9134	44.9394	0.0244465	0.015424	0.00405705	0.0156469	0.0135736	0.00454526	1	0	0	0	0	2	0	0	0
485	Hemibates	Cichlidae	y	y	1	NA	7.64492	0	0	0	NA	NA	NA	0	0	0	0	0	0	0	0	1
486	Hemicaranx	Carangidae	y	n	4	0.779298	20.135	0.06885	0.0455074	0.0130303	0.889451	0.760664	0.259929	3	1	0	0	0	2	0	0	3
487	Hemieleotris	Eleotridae	y	y	2	NA	29.008	0.023895	0.0139777	0.00328565	NA	NA	NA	0	0	0	0	0	0	0	0	2
488	Hemiglyphidodon	Pomacentridae	y	y	1	NA	25.4857	0	0	0	NA	NA	NA	0	0	0	1	1	0	0	0	0
489	Hemigymnus	Labridae	y	n	3	9.62146	39.1229	0.0280811	0.0177172	0.00466023	0.0421417	0.0365576	0.0122417	0	0	2	2	2	1	0	0	0
490	Hemilepidotus	Cottidae	y	n	6	8.79185	29.1693	0.0614263	0.0429481	0.0139004	0.124958	0.107305	0.039713	0	0	0	0	0	1	6	0	0
491	Hemirhamphodon	Zenarchopteridae	y	y	9	NA	38.3125	0.0573501	0.0420082	0.0153419	NA	NA	NA	0	0	0	0	0	0	0	0	9
492	Hemitaurichthys	Chaetodontidae	y	n	4	8.6025	26.8506	0.0516299	0.0341255	0.00977126	0.0805751	0.0689083	0.0235469	0	0	1	2	3	0	0	0	0
493	Herichthys	Cichlidae	y	n	6	5.41421	8.42879	0.212576	0.148629	0.0481048	0.202913	0.174247	0.0644878	0	0	0	0	0	0	0	0	6
494	Heroina	Cichlidae	y	y	1	NA	14.2328	0	0	0	NA	NA	NA	0	0	0	0	0	0	0	0	1
495	Heros	Cichlidae	y	n	4	12.8387	16.4158	0.0844486	0.0558175	0.0159824	0.0539889	0.0461716	0.0157775	0	0	0	0	0	0	0	0	4
496	Heterochromis	Cichlidae	y	y	1	NA	54.3263	0	0	0	NA	NA	NA	0	0	0	0	0	0	0	0	1
497	Heteromycteris	Soleidae	y	y	6	NA	71.2734	0.0251392	0.0175769	0.00568887	NA	NA	NA	0	2	1	4	0	0	0	0	2
498	Heterophallus	Poeciliidae	y	n	2	7.71713	16.2393	0.0426833	0.0249681	0.00586911	0	0	0	0	0	0	0	0	0	0	0	2
499	Heteropriacanthus	Priacanthidae	y	y	1	NA	13.5917	0	0	0	NA	NA	NA	1	1	1	1	1	1	1	1	0
500	Heteroscarus	Odacidae	y	y	1	NA	36.6051	0	0	0	NA	NA	NA	0	0	0	1	1	0	0	1	0
501	Heterostichus	Clinidae	y	y	1	NA	31.5985	0	0	0	NA	NA	NA	0	0	0	0	0	1	1	0	0
502	Hexagrammos	Hexagrammidae	y	n	6	12.3581	35.2298	0.0508592	0.0355598	0.0115092	0.0888982	0.0763395	0.0282528	0	0	0	2	0	0	6	0	0
503	Himantolophus	Himantolophidae	y	n	21	22.1091	31.0569	0.0980304	0.0772097	0.0353742	0.106353	0.0951963	0.0473142	9	7	3	5	6	2	4	2	0
504	Hippichthys	Syngnathidae	y	y	6	NA	65.0178	0.027558	0.019268	0.00623622	NA	NA	NA	0	0	2	3	3	0	0	0	6
505	Hippocampus	Syngnathidae	y	n	54	34.3666	58.2871	0.0684368	0.0568597	0.0315773	0.0959024	0.0880045	0.0520502	6	3	13	30	20	1	5	4	7
506	Hippoglossina	Paralichthyidae	y	y	7	NA	37.3253	0.0521338	0.0371409	0.0125921	NA	NA	NA	1	0	0	0	0	5	2	1	0
507	Hippoglossoides	Pleuronectidae	y	n	4	3.79639	8.454	0.163981	0.108385	0.0310343	0.182581	0.156144	0.0533565	1	1	0	0	0	0	4	0	0
508	Hippoglossus	Pleuronectidae	y	n	2	4.4057	13.8841	0.0499236	0.0292035	0.00686467	0	0	0	1	0	0	0	0	1	2	0	0
509	Hipposcarus	Scaridae	y	y	2	NA	22.7026	0.0305316	0.0178599	0.0041982	NA	NA	NA	0	0	1	2	2	0	0	0	0
510	Histiodraco	Artedidraconidae	y	y	1	NA	7.07144	0	0	0	NA	NA	NA	0	0	0	0	0	0	0	1	0
511	Holacanthus	Pomacanthidae	y	n	7	17.1717	26.1508	0.0744112	0.0530116	0.0179729	0.0729551	0.0629232	0.0241407	3	1	0	0	0	3	0	0	0
512	Hologymnosus	Labridae	y	n	4	0.944754	34.4188	0.0402773	0.0266218	0.00762271	0.73368	0.627448	0.214407	0	0	2	3	3	0	0	0	0
513	Hoplarchus	Cichlidae	y	y	1	NA	22.3269	0	0	0	NA	NA	NA	0	0	0	0	0	0	0	0	1
514	Hoplichthys	Hoplichthyidae	y	y	12	NA	83.2964	0.0298321	0.0224716	0.0089072	NA	NA	NA	0	0	1	8	6	1	0	1	0
515	Hoplolatilus	Malacanthidae	y	y	13	NA	49.6118	0.0517004	0.0392227	0.0158925	NA	NA	NA	0	0	3	10	4	0	0	0	0
516	Hozukius	Sebastidae	y	y	2	NA	13.054	0.0530985	0.0310606	0.00730122	NA	NA	NA	0	0	0	1	1	0	1	0	0
517	Hubbsina	Goodeidae	y	y	1	NA	14.0232	0	0	0	NA	NA	NA	0	0	0	0	0	0	0	0	1
518	Hyperoglyphe	Centrolophidae	y	y	6	NA	11.8569	0.151115	0.105657	0.0341966	NA	NA	NA	3	1	0	1	2	1	1	1	0
519	Hyperoplus	Ammodytidae	y	y	2	NA	5.46044	0.12694	0.074255	0.0174547	NA	NA	NA	0	2	0	0	0	0	2	0	1
520	Hypoclinemus	Achiridae	y	y	1	NA	13.5019	0	0	0	NA	NA	NA	0	0	0	0	0	0	0	0	1
521	Hypoplectrus	Serranidae	y	n	17	2.85649	39.5223	0.0716865	0.0555946	0.0241765	0.749195	0.666086	0.316004	17	0	0	0	0	0	0	0	0
522	Hypoptychus	Hypoptychidae	y	y	1	NA	43.1732	0	0	0	NA	NA	NA	0	0	0	1	0	0	1	0	0
523	Hypsagonus	Agonidae	y	y	2	NA	21.6923	0.0319536	0.0186917	0.00439374	NA	NA	NA	0	0	0	0	0	0	2	0	0
524	Hypselecara	Cichlidae	y	n	2	14.2064	22.3269	0.0310454	0.0181604	0.00426885	0	0	0	0	0	0	0	0	0	0	0	2
525	Hypseleotris	Eleotridae	y	n	16	13.4847	41.7571	0.0663981	0.0512504	0.0219434	0.154208	0.136826	0.0640234	0	0	1	3	1	0	0	0	16
526	Hypsoblennius	Blenniidae	y	y	16	NA	51.1962	0.0541561	0.0418013	0.0178976	NA	NA	NA	4	0	0	1	0	11	1	1	2
527	Hypsophrys	Cichlidae	y	n	2	6.53516	9.83979	0.0704433	0.0412067	0.0096862	0	0	0	0	0	0	0	0	0	0	0	2
528	Hypsopsetta	Pleuronectidae	y	y	2	NA	24.2517	0.0285814	0.016719	0.00393004	NA	NA	NA	0	0	0	0	0	2	1	0	1
529	Hypsurus	Embiotocidae	y	y	1	NA	17.6064	0	0	0	NA	NA	NA	0	0	0	0	0	1	1	0	0
530	Hypsypops	Pomacentridae	y	y	1	NA	12.6425	0	0	0	NA	NA	NA	0	0	0	0	0	1	1	0	0
531	Hysterocarpus	Embiotocidae	y	y	1	NA	15.1137	0	0	0	NA	NA	NA	0	0	0	0	0	0	0	0	1
532	Icelinus	Cottidae	y	n	11	11.7765	28.0358	0.0855299	0.0639098	0.0247237	0.144758	0.126789	0.054291	0	0	0	0	0	4	11	0	0
533	Icelus	Cottidae	y	y	17	NA	22.0646	0.128406	0.0995817	0.0433053	NA	NA	NA	0	0	0	0	0	0	17	0	0
534	Icichthys	Centrolophidae	y	y	2	NA	8.94132	0.0775218	0.0453473	0.0106595	NA	NA	NA	0	1	0	0	0	0	1	1	0
535	Icosteus	Icosteidae	y	y	1	NA	40.6231	0	0	0	NA	NA	NA	0	0	0	0	0	0	1	0	0
536	Idiotropiscis	Syngnathidae	y	y	3	NA	58.2871	0.0188483	0.0118919	0.00312799	NA	NA	NA	0	0	0	2	1	0	0	0	0
537	Ilyodon	Goodeidae	y	n	5	0.601861	12.0945	0.133072	0.090836	0.0278204	1.52243	1.30254	0.463347	0	0	0	0	0	0	0	0	5
538	Indostomus	Indostomidae	y	y	3	NA	53.378	0.0205818	0.0129856	0.00341567	NA	NA	NA	0	0	0	0	0	0	0	0	3
539	Iniistius	Labridae	y	y	21	NA	23.7639	0.128115	0.100905	0.0462303	NA	NA	NA	0	0	6	15	8	1	0	0	0
540	Iracundus	Scorpaenidae	y	y	1	NA	34.1561	0	0	0	NA	NA	NA	0	0	1	0	1	0	0	0	0
541	Iranocichla	Cichlidae	y	y	1	NA	5.05404	0	0	0	NA	NA	NA	0	0	0	0	0	0	0	0	1
542	Iriatherina	Melanotaeniidae	y	y	1	NA	39.9134	0	0	0	NA	NA	NA	0	0	0	0	0	0	0	0	1
543	Iso	Isonidae	y	y	5	NA	58.1394	0.0276824	0.0188962	0.00578734	NA	NA	NA	0	0	1	1	3	0	0	1	1
544	Isopisthus	Sciaenidae	y	y	2	NA	7.86551	0.0881249	0.0515498	0.0121175	NA	NA	NA	2	0	0	0	0	1	0	0	2
545	Isopsetta	Pleuronectidae	y	y	1	NA	4.21759	0	0	0	NA	NA	NA	0	0	0	0	0	0	1	0	0
546	Istiompax	Istiophoridae	y	y	1	NA	4.04914	0	0	0	NA	NA	NA	1	1	1	1	1	1	1	1	0
547	Jenynsia	Anablepidae	y	n	14	0.135884	39.1303	0.0674428	0.0514921	0.0212855	14.3204	12.6488	5.73796	0	0	0	0	0	0	0	0	14
548	Johnrandallia	Chaetodontidae	y	y	1	NA	20.8946	0	0	0	NA	NA	NA	0	0	0	0	0	1	0	0	0
549	Jordanella	Cyprinodontidae	y	y	1	NA	27.3342	0	0	0	NA	NA	NA	0	0	0	0	0	0	0	0	1
550	Jordania	Cottidae	y	y	1	NA	37.1312	0	0	0	NA	NA	NA	0	0	0	0	0	0	1	0	0
551	Kajikia	Istiophoridae	y	n	2	1.08422	5.30303	0.130708	0.0764591	0.0179728	0	0	0	1	1	1	0	1	1	1	2	0
552	Kali	Chiasmodontidae	y	y	7	NA	79.9264	0.0243463	0.0173446	0.00588045	NA	NA	NA	5	6	5	3	5	4	2	0	0
553	Karalla	Leiognathidae	y	n	2	25.5066	29.1137	0.0238083	0.013927	0.00327372	0	0	0	0	0	1	2	1	0	0	0	1
554	Kareius	Pleuronectidae	y	y	1	NA	2.22749	0	0	0	NA	NA	NA	0	0	0	1	0	0	1	0	1
555	Kasatkia	Stichaeidae	y	y	2	NA	27.7734	0.0249572	0.014599	0.00343171	NA	NA	NA	0	0	0	0	0	0	2	0	0
556	Kathetostoma	Uranoscopidae	y	n	9	16.616	77.4644	0.0283643	0.0207765	0.00758783	0.0905198	0.0787259	0.0320998	2	0	0	3	3	1	2	4	1
557	Katria	Cichlidae	y	y	1	NA	18.2006	0	0	0	NA	NA	NA	0	0	0	0	0	0	0	0	1
558	Katsuwonus	Scombridae	y	y	1	NA	6.62529	0	0	0	NA	NA	NA	1	1	1	1	1	1	1	1	0
559	Kaupus	Syngnathidae	y	y	1	NA	19.8244	0	0	0	NA	NA	NA	0	0	0	1	0	0	0	0	0
560	Kestratherina	Atherinidae	y	n	2	0.98452	21.7119	0.0319247	0.0186748	0.00438976	0	0	0	0	0	0	1	0	0	0	2	2
561	Konia	Cichlidae	y	n	2	0.819033	1.33372	0.51971	0.304011	0.0714619	0	0	0	0	0	0	0	0	0	0	0	2
562	Koumansetta	Gobiidae	y	y	2	NA	42.1485	0.0164454	0.00961992	0.00226129	NA	NA	NA	0	0	1	2	2	0	0	0	0
563	Kraemeria	Kraemeriidae	y	y	7	NA	37.2295	0.052268	0.0372365	0.0126245	NA	NA	NA	0	0	2	5	4	0	0	0	6
564	Kribia	Eleotridae	y	y	4	NA	50.9868	0.0271893	0.0179711	0.00514573	NA	NA	NA	0	0	0	0	0	0	0	0	4
565	Kuhlia	Kuhliidae	y	n	13	53.8492	54.0053	0.0474944	0.0360318	0.0145996	0.0347601	0.0306241	0.0136508	2	0	3	3	6	2	0	0	11
566	Kuiterichthys	Antennariidae	y	y	1	NA	8.08031	0	0	0	NA	NA	NA	0	0	0	0	1	0	0	1	0
567	Kurtus	Kurtidae	y	y	2	NA	49.7558	0.013931	0.0081491	0.00191556	NA	NA	NA	0	0	0	1	0	0	0	0	2
568	Kyphosus	Kyphosidae	y	n	18	22.7777	41.89	0.068999	0.0537429	0.0237109	0.0964638	0.0859232	0.04129	6	4	3	5	7	6	3	1	1
569	Labeotropheus	Cichlidae	y	y	2	NA	1.8166	0.381563	0.2232	0.0524662	NA	NA	NA	0	0	0	0	0	0	0	0	2
570	Labidesthes	Atherinopsidae	y	y	1	NA	33.0551	0	0	0	NA	NA	NA	0	0	0	0	0	0	0	0	1
571	Labidochromis	Cichlidae	y	y	18	NA	3.05475	0.946189	0.736981	0.32515	NA	NA	NA	0	0	0	0	0	0	0	0	18
572	Labrichthys	Labridae	y	y	1	NA	36.6575	0	0	0	NA	NA	NA	0	0	1	1	1	0	0	0	0
573	Labrisomus	Labrisomidae	y	n	11	8.60543	34.936	0.0686368	0.0512869	0.0198405	0.198101	0.17351	0.0742971	3	1	0	0	1	7	0	1	0
574	Labropsis	Labridae	y	y	6	NA	16.9987	0.105406	0.0736976	0.0238527	NA	NA	NA	0	0	0	4	4	0	0	0	0
575	Labrus	Labridae	y	n	4	12.7026	25.7208	0.0538978	0.0356245	0.0102005	0.0545673	0.0466663	0.0159465	0	4	0	0	0	0	0	0	0
576	Lachnolaimus	Labridae	y	y	1	NA	70.8395	0	0	0	NA	NA	NA	1	0	0	0	0	0	0	0	0
577	Lactophrys	Ostraciidae	y	y	2	NA	7.93145	0.0873922	0.0511212	0.0120167	NA	NA	NA	2	0	0	0	0	0	1	0	0
578	Lactoria	Ostraciidae	y	y	4	NA	22.7905	0.0608277	0.0402049	0.011512	NA	NA	NA	0	0	2	3	3	1	2	0	2
579	Laeops	Bothidae	y	y	13	NA	35.2822	0.0726981	0.0551527	0.0223472	NA	NA	NA	0	0	7	9	1	0	1	0	0
580	Laetacara	Cichlidae	y	n	7	7.50453	27.7074	0.0702307	0.0500333	0.0169631	0.166934	0.143979	0.0552382	0	0	0	0	0	0	0	0	7
581	Lagodon	Sparidae	y	y	1	NA	26.2494	0	0	0	NA	NA	NA	1	0	0	0	0	0	0	0	1
582	Lamprogrammus	Ophidiidae	y	y	5	NA	85.2221	0.0188852	0.0128912	0.00394818	NA	NA	NA	3	3	1	3	1	0	1	0	0
583	Lappanella	Labridae	y	y	2	NA	29.5094	0.0234891	0.0137402	0.00322983	NA	NA	NA	0	2	0	0	0	0	0	0	0
584	Larabicus	Labridae	y	y	1	NA	16.1611	0	0	0	NA	NA	NA	0	0	1	0	0	0	0	0	0
585	Larimichthys	Sciaenidae	y	n	3	11.1991	14.9971	0.073255	0.0462187	0.0121571	0.0362052	0.0314076	0.0105172	0	0	0	3	0	0	2	0	2
586	Larimus	Sciaenidae	y	y	6	NA	21.0308	0.0851969	0.059568	0.0192796	NA	NA	NA	5	0	0	0	0	4	1	0	2
587	Lateolabrax	Lateolabracidae	y	n	2	15.8495	17.7767	0.0389919	0.0228088	0.00536152	0	0	0	0	0	0	2	0	0	1	0	1
588	Lates	Latidae	y	n	11	54.3691	105.588	0.0227099	0.0169693	0.00656464	0.0313551	0.0274628	0.0117596	0	0	1	2	2	0	0	1	11
589	Latridopsis	Latridae	y	n	2	6.32054	20.3491	0.0340627	0.0199254	0.00468374	0	0	0	0	0	0	1	0	0	0	2	0
590	Latris	Latridae	y	y	2	NA	17.9956	0.0385176	0.0225313	0.00529631	NA	NA	NA	1	1	1	1	2	1	0	1	0
591	Leiocottus	Cottidae	y	y	1	NA	8.10471	0	0	0	NA	NA	NA	0	0	0	0	0	1	0	0	0
592	Leiostomus	Sciaenidae	y	y	1	NA	20.8234	0	0	0	NA	NA	NA	1	0	0	0	0	0	1	0	1
593	Lentipes	Gobiidae	y	y	18	NA	22.084	0.130881	0.101942	0.0449761	NA	NA	NA	0	0	0	3	1	0	0	0	17
594	Leocottus	Cottocomephoridae	y	y	1	NA	4.02003	0	0	0	NA	NA	NA	0	0	0	0	0	0	0	0	1
595	Lepidoblepharon	Citharidae	y	y	1	NA	86.0574	0	0	0	NA	NA	NA	0	0	0	1	1	0	0	0	0
596	Lepidocybium	Gempylidae	y	y	1	NA	67.1579	0	0	0	NA	NA	NA	1	0	0	0	0	1	1	0	0
597	Lepidogobius	Gobiidae	y	y	1	NA	110.479	0	0	0	NA	NA	NA	0	0	0	0	0	1	1	0	0
598	Lepidonotothen	Nototheniidae	y	y	1	NA	6.84868	0	0	0	NA	NA	NA	1	0	0	0	0	0	0	1	0
599	Lepidopsetta	Pleuronectidae	y	n	3	3.5259	6.79051	0.161786	0.102076	0.0268495	0.114996	0.0997582	0.0334051	0	0	0	0	0	0	3	0	0
600	Lepidorhombus	Scophthalmidae	y	n	2	14.202	25.5847	0.0270923	0.015848	0.00372528	0	0	0	0	2	0	0	0	0	2	0	0
601	Lepidotrigla	Triglidae	y	n	53	13.06	45.5522	0.0871592	0.072353	0.040054	0.25093	0.230171	0.135741	0	6	9	33	19	0	2	4	0
602	Lepidozygus	Pomacentridae	y	y	1	NA	44.8837	0	0	0	NA	NA	NA	0	0	1	1	1	0	0	0	0
603	Lepomis	Centrarchidae	y	n	13	25.5769	35.3328	0.0725939	0.0550737	0.0223151	0.0731833	0.0644755	0.0287402	0	0	0	0	0	0	0	0	13
604	Lepophidium	Ophidiidae	y	y	23	NA	40.1626	0.07807	0.0618712	0.028961	NA	NA	NA	16	0	0	0	0	7	1	0	0
605	Leptatherina	Atherinidae	y	n	2	16.0275	23.7169	0.0292259	0.0170961	0.00401866	0	0	0	0	0	0	1	1	0	0	1	1
606	Leptobrama	Leptobramidae	y	y	1	NA	65.8199	0	0	0	NA	NA	NA	0	0	0	1	1	0	0	0	1
607	Leptocottus	Cottidae	y	y	1	NA	21.8615	0	0	0	NA	NA	NA	0	0	0	0	0	1	1	0	1
608	Leptojulis	Labridae	y	y	5	NA	33.5288	0.0480017	0.0327662	0.0100353	NA	NA	NA	0	0	0	5	1	0	0	0	0
609	Leptolebias	Rivulidae	y	y	6	NA	46.4285	0.0385918	0.0269826	0.00873311	NA	NA	NA	0	0	0	0	0	0	0	0	6
610	Leptophilypnus	Eleotridae	y	n	3	31.6916	49.4048	0.022237	0.01403	0.00369036	0.0127941	0.0110988	0.00371654	0	0	0	0	0	0	0	0	3
611	Leptoscarus	Scaridae	y	y	1	NA	18.4965	0	0	0	NA	NA	NA	0	0	1	1	1	0	0	0	0
612	Lesueurigobius	Gobiidae	y	n	5	20.6808	32.4899	0.0495366	0.033814	0.0103562	0.0443063	0.037907	0.0134845	0	5	0	0	0	0	1	0	0
613	Lesueurina	Leptoscopidae	y	y	1	NA	72.5327	0	0	0	NA	NA	NA	0	0	0	1	1	0	0	1	0
614	Lethops	Gobiidae	y	y	1	NA	25.458	0	0	0	NA	NA	NA	0	0	0	0	0	1	0	0	0
615	Lethrinus	Lethrinidae	y	n	27	35.0394	57.3245	0.0574944	0.0460372	0.0223453	0.074279	0.0669855	0.0350658	0	2	16	23	20	0	0	1	6
616	Leucopsarion	Gobiidae	y	y	1	NA	46.8019	0	0	0	NA	NA	NA	0	0	0	1	0	0	0	0	1
617	Leuresthes	Atherinopsidae	y	y	2	NA	14.3614	0.0482646	0.028233	0.00663655	NA	NA	NA	0	0	0	0	0	2	1	0	0
618	Lichia	Carangidae	y	y	1	NA	62.9655	0	0	0	NA	NA	NA	0	1	1	0	0	0	0	0	1
619	Limia	Poeciliidae	y	n	21	13.0118	18.9959	0.160273	0.126232	0.0578342	0.180711	0.161753	0.0803942	0	0	0	0	0	0	0	0	21
620	Limnocottus	Abyssocottidae	y	n	4	1.77478	3.8797	0.35732	0.236176	0.0676249	0.390554	0.334004	0.114134	0	0	0	0	0	0	0	0	4
621	Limnotilapia	Cichlidae	y	y	1	NA	1.65824	0	0	0	NA	NA	NA	0	0	0	0	0	0	0	0	1
622	Linophryne	Linophrynidae	y	y	22	NA	44.7649	0.0690506	0.0545594	0.0252743	NA	NA	NA	10	6	2	4	3	4	6	0	0
623	Liopropoma	Serranidae	y	n	30	30.2221	62.2574	0.0546312	0.0440243	0.0218605	0.089605	0.0810449	0.0433068	8	2	4	17	9	2	0	0	0
624	Liopsetta	Pleuronectidae	y	y	2	NA	4.84635	0.143025	0.0836641	0.0196664	NA	NA	NA	0	0	0	0	0	0	2	0	2
625	Lipophrys	Blenniidae	y	n	2	18.7628	23.2175	0.0298545	0.0174637	0.0041051	0	0	0	0	2	0	0	0	0	1	0	0
626	Lithognathus	Sparidae	y	y	4	NA	22.8771	0.0605975	0.0400527	0.0114684	NA	NA	NA	0	4	2	1	0	0	0	0	2
627	Llanolebias	Rivulidae	y	y	1	NA	9.85828	0	0	0	NA	NA	NA	0	0	0	0	0	0	0	0	1
628	Lobochilotes	Cichlidae	y	y	1	NA	4.25058	0	0	0	NA	NA	NA	0	0	0	0	0	0	0	0	1
629	Lobotes	Lobotidae	y	y	2	NA	85.0695	0.00814801	0.00476628	0.00112038	NA	NA	NA	2	1	1	1	1	2	1	1	2
630	Lonchurus	Sciaenidae	y	y	2	NA	27.5923	0.025121	0.0146949	0.00345423	NA	NA	NA	2	0	1	0	0	0	0	0	2
631	Lophius	Lophiidae	y	n	7	5.56376	39.6592	0.0490658	0.0349552	0.0118511	0.225165	0.194203	0.0745066	2	4	1	1	0	0	4	0	0
632	Lophodolos	Oneirodidae	y	y	2	NA	21.4195	0.0323606	0.0189297	0.00444969	NA	NA	NA	2	1	0	1	1	0	1	0	0
633	Lophogobius	Gobiidae	y	y	3	NA	39.8435	0.0275732	0.0173967	0.00457594	NA	NA	NA	1	0	0	1	1	2	0	0	2
634	Lopholatilus	Malacanthidae	y	y	2	NA	13.9928	0.049536	0.0289767	0.00681137	NA	NA	NA	2	0	0	0	0	0	1	0	0
635	Lophonectes	Bothidae	y	y	2	NA	35.2822	0.0196458	0.0114921	0.00270137	NA	NA	NA	0	0	0	0	2	0	0	1	0
636	Lucania	Fundulidae	y	n	3	2.11367	25.6693	0.0427987	0.027003	0.00710272	0.19183	0.166411	0.0557244	1	0	0	0	0	0	0	0	3
637	Lumpenus	Stichaeidae	y	y	3	NA	20.9749	0.0523776	0.0330466	0.00869239	NA	NA	NA	1	0	0	0	0	0	3	0	0
638	Luvarus	Luvaridae	y	y	1	NA	57.3717	0	0	0	NA	NA	NA	1	1	1	0	1	1	1	0	0
639	Luzonichthys	Serranidae	y	y	6	NA	53.4275	0.0335363	0.0234479	0.00758907	NA	NA	NA	0	0	2	4	4	0	0	0	0
640	Lycogrammoides	Zoarcidae	y	y	1	NA	4.95381	0	0	0	NA	NA	NA	0	0	0	0	0	0	1	0	0
641	Lyconema	Zoarcidae	y	y	1	NA	2.78727	0	0	0	NA	NA	NA	0	0	0	0	0	0	1	0	0
642	Lycozoarces	Zoarcidae	y	y	1	NA	6.06604	0	0	0	NA	NA	NA	0	0	0	0	0	0	1	0	0
643	Lyopsetta	Pleuronectidae	y	y	1	NA	18.622	0	0	0	NA	NA	NA	0	0	0	0	0	0	1	0	0
644	Maccullochella	Percichthyidae	y	n	4	6.12348	33.3751	0.0415368	0.0274543	0.00786108	0.113195	0.096805	0.0330796	0	0	0	0	0	0	0	0	4
645	Macolor	Lutjanidae	y	y	2	NA	18.966	0.0365468	0.0213785	0.00502532	NA	NA	NA	0	0	1	2	2	0	0	0	0
646	Macrodon	Sciaenidae	y	n	3	0.241739	17.7548	0.0618769	0.03904	0.0102689	1.67728	1.45503	0.487232	3	0	0	0	0	1	0	0	2
647	Macrognathus	Mastacembelidae	y	y	24	NA	37.1747	0.0854897	0.0679421	0.0321165	NA	NA	NA	0	0	0	0	0	0	0	0	24
648	Macropodus	Osphronemidae	y	n	9	29.5021	48.7234	0.0450959	0.0330321	0.0120637	0.050982	0.0443395	0.0180791	0	0	0	0	0	0	0	0	9
649	Macroramphosus	Centriscidae	y	y	2	NA	105.769	0.00655341	0.0038335	0.000901116	NA	NA	NA	2	2	2	2	2	2	1	1	0
650	Magadanichthys	Zoarcidae	y	y	1	NA	3.86908	0	0	0	NA	NA	NA	0	0	0	0	0	0	1	0	1
651	Makaira	Istiophoridae	y	n	2	0.840711	2.7036	0.256379	0.149972	0.035253	0	0	0	1	1	2	2	1	1	1	0	0
652	Malacocottus	Psychrolutidae	y	n	4	0.913698	12.2471	0.113194	0.074817	0.0214226	0.758617	0.648774	0.221695	0	0	0	0	0	0	4	0	0
653	Malacoctenus	Labrisomidae	y	y	23	NA	34.936	0.0897497	0.0711274	0.0332938	NA	NA	NA	9	2	0	0	0	12	0	0	0
654	Malakichthys	Acropomatidae	y	n	7	10.525	45.9152	0.0423805	0.0301925	0.0102363	0.119027	0.10266	0.0393859	0	0	0	6	2	0	0	0	0
655	Malapterus	Labridae	y	y	1	NA	71.8621	0	0	0	NA	NA	NA	0	0	0	0	1	0	0	0	0
656	Malpulutta	Osphronemidae	y	y	1	NA	37.9599	0	0	0	NA	NA	NA	0	0	0	0	0	0	0	0	1
657	Marilyna	Tetraodontidae	y	y	3	NA	36.9135	0.0297618	0.0187776	0.00493915	NA	NA	NA	0	0	0	2	1	0	0	0	3
658	Marosatherina	Telmatherinidae	y	y	1	NA	73.0864	0	0	0	NA	NA	NA	0	0	0	0	0	0	0	0	1
659	Marukawichthys	Ereuniidae	y	y	2	NA	15.198	0.0456078	0.0266788	0.00627123	NA	NA	NA	0	0	0	1	1	0	1	0	0
660	Mastacembelus	Mastacembelidae	y	n	61	32.4351	37.1747	0.110583	0.0923743	0.052345	0.105371	0.0969462	0.0583998	0	0	0	0	0	0	0	0	61
661	Masturus	Molidae	y	y	1	NA	2.91561	0	0	0	NA	NA	NA	1	1	1	1	1	1	0	0	1
662	Maxillicosta	Neosebastidae	y	y	6	NA	18.4848	0.0969315	0.0677726	0.0219351	NA	NA	NA	0	0	0	3	3	1	0	3	0
663	Mecaenichthys	Pomacentridae	y	y	1	NA	22.7175	0	0	0	NA	NA	NA	0	0	0	0	1	0	0	0	0
664	Medialuna	Kyphosidae	y	y	2	NA	42.0633	0.0164787	0.00963941	0.00226588	NA	NA	NA	0	0	0	0	0	2	0	0	0
665	Megupsilon	Cyprinodontidae	y	y	1	NA	16.7414	0	0	0	NA	NA	NA	0	0	0	0	0	0	0	0	1
666	Meiacanthus	Blenniidae	y	n	28	4.83867	50.6841	0.0657446	0.0527611	0.0258135	0.54541	0.492362	0.2596	0	0	4	20	11	0	0	0	1
667	Melanocetus	Melanocetidae	y	y	6	NA	30.9333	0.0579233	0.0404988	0.0131077	NA	NA	NA	3	2	1	2	3	4	1	2	0
668	Melanochromis	Cichlidae	y	y	15	NA	3.67701	0.736482	0.565525	0.238093	NA	NA	NA	0	0	0	0	0	0	0	0	15
669	Melanorivulus	Rivulidae	y	n	39	14.6032	39.4009	0.0929817	0.0760321	0.0398117	0.203408	0.185243	0.103859	0	0	0	0	0	0	0	0	39
670	Melichthys	Balistidae	y	n	3	5.17909	18.1192	0.0606325	0.0382549	0.0100623	0.0782889	0.0679149	0.022742	1	1	2	3	2	1	0	0	0
671	Membras	Atherinopsidae	y	y	6	NA	22.3649	0.0801148	0.0560147	0.0181295	NA	NA	NA	4	0	0	0	0	1	0	0	2
672	Mendosoma	Latridae	y	y	1	NA	17.9956	0	0	0	NA	NA	NA	1	1	0	1	0	1	0	0	0
673	Mene	Menidae	y	y	1	NA	58.2221	0	0	0	NA	NA	NA	0	0	1	1	1	0	0	0	1
674	Menidia	Atherinopsidae	y	y	8	NA	6.59594	0.315261	0.228031	0.0804477	NA	NA	NA	4	0	0	0	0	0	2	0	8
675	Menticirrhus	Sciaenidae	y	n	9	13.593	23.1864	0.0947637	0.0694132	0.0253505	0.110651	0.096234	0.0392386	4	0	1	0	0	5	2	0	3
676	Mesogobius	Gobiidae	y	y	3	NA	15.3235	0.0716946	0.0452343	0.0118982	NA	NA	NA	0	1	0	0	0	0	0	0	3
677	Mesonauta	Cichlidae	y	n	6	9.06612	20.7246	0.0864556	0.0604481	0.0195644	0.121178	0.104059	0.0385116	0	0	0	0	0	0	0	0	6
678	Meuschenia	Monacanthidae	y	n	8	6.03495	14.7985	0.140518	0.101637	0.035857	0.229711	0.198979	0.0788346	0	0	0	8	7	0	0	4	0
679	Microcanthus	Kyphosidae	y	y	1	NA	32.6598	0	0	0	NA	NA	NA	0	0	0	1	1	0	1	1	1
680	Microcottus	Cottidae	y	y	2	NA	4.1286	0.167889	0.0982089	0.0230854	NA	NA	NA	0	0	0	0	0	0	2	0	0
681	Microctenopoma	Anabantidae	y	n	12	14.0587	31.75	0.0782648	0.0589544	0.0233681	0.127449	0.11197	0.0489645	0	0	0	0	0	0	0	0	12
682	Microdesmus	Microdesmidae	y	n	16	20.7036	25.3659	0.109304	0.0843678	0.0361229	0.100439	0.0891174	0.0416998	5	2	0	2	0	9	0	0	4
683	Microgobius	Gobiidae	y	n	15	23.7733	54.5764	0.0496194	0.0381015	0.0160412	0.0847549	0.0750384	0.0345932	8	0	0	0	0	9	0	0	2
684	Microlepidotus	Haemulidae	y	y	2	NA	14.3547	0.0482871	0.0282462	0.00663965	NA	NA	NA	0	0	0	0	0	2	0	0	0
685	Microlipophrys	Blenniidae	y	n	7	36.7481	64.7885	0.0300348	0.0213972	0.00725443	0.0340906	0.0294028	0.0112805	0	7	0	0	0	0	0	0	0
686	Micrometrus	Embiotocidae	y	y	2	NA	20.4499	0.033895	0.0198273	0.00466068	NA	NA	NA	0	0	0	0	0	2	2	0	0
687	Micromoema	Rivulidae	y	y	1	NA	14.0907	0	0	0	NA	NA	NA	0	0	0	0	0	0	0	0	1
688	Micropercops	Odontobutidae	y	y	3	NA	71.5166	0.0153616	0.00969211	0.00254936	NA	NA	NA	0	0	0	0	0	0	0	0	3
689	Microphis	Syngnathidae	y	y	19	NA	57.3417	0.051349	0.0401555	0.0179559	NA	NA	NA	2	3	4	2	2	0	0	0	19
690	Micropogonias	Sciaenidae	y	n	6	2.95798	20.2582	0.0884462	0.0618399	0.0200149	0.371406	0.318938	0.118037	3	0	0	0	0	4	1	0	5
691	Micropterus	Centrarchidae	y	n	13	12.2082	35.3328	0.0725939	0.0550737	0.0223151	0.153323	0.13508	0.0602122	0	0	0	0	0	0	0	0	13
692	Microspathodon	Pomacentridae	y	n	4	10.0578	27.4565	0.0504906	0.0333725	0.00955563	0.0689164	0.0589377	0.0201398	1	1	0	0	0	2	0	0	0
693	Miichthys	Sciaenidae	y	y	1	NA	26.269	0	0	0	NA	NA	NA	0	0	0	1	0	0	0	0	1
694	Mikrogeophagus	Cichlidae	y	n	2	27.2205	33.8284	0.0204901	0.0119859	0.00281746	0	0	0	0	0	0	0	0	0	0	0	2
695	Milyeringa	Eleotridae	y	n	3	3.44087	80.4945	0.0136483	0.00861112	0.00226502	0.117838	0.102223	0.0342306	0	0	0	0	0	0	0	0	3
696	Mogurnda	Eleotridae	y	n	25	2.73772	39.5646	0.0813574	0.0648294	0.0309311	0.922566	0.830132	0.42789	0	0	0	0	0	0	0	0	25
697	Monochirus	Soleidae	y	y	2	NA	10.7505	0.0644758	0.0377159	0.00886565	NA	NA	NA	0	1	0	1	0	0	0	0	0
698	Monocirrhus	Polycentridae	y	y	1	NA	76.1729	0	0	0	NA	NA	NA	0	0	0	0	0	0	0	0	1
699	Monopterus	Synbranchidae	y	y	13	NA	53.2527	0.0481656	0.0365411	0.014806	NA	NA	NA	0	0	0	0	0	0	0	0	13
700	Monotaxis	Lethrinidae	y	y	1	NA	24.0526	0	0	0	NA	NA	NA	0	0	0	1	1	0	0	0	0
701	Morone	Moronidae	y	n	4	31.3119	74	0.0187337	0.0123823	0.00354546	0.0221369	0.0189316	0.00646918	2	0	0	0	0	0	2	0	4
702	Myaka	Cichlidae	y	y	1	NA	2.02059	0	0	0	NA	NA	NA	0	0	0	0	0	0	0	0	1
703	Nandopsis	Cichlidae	y	n	3	12.876	16.9383	0.0648598	0.040922	0.0107639	0.0314899	0.0273172	0.00914747	0	0	0	0	0	0	0	0	3
704	Nandus	Nandidae	y	n	7	27.775	49.3748	0.039411	0.0280769	0.00951909	0.045104	0.0389018	0.0149248	0	0	0	0	0	0	0	0	7
705	Nannacara	Cichlidae	y	n	6	23.2724	29.1724	0.0614196	0.0429434	0.0138989	0.0472067	0.0405378	0.0150028	0	0	0	0	0	0	0	0	6
706	Nannatherina	Percichthyidae	y	y	1	NA	22.3884	0	0	0	NA	NA	NA	0	0	0	0	0	0	0	0	1
707	Nannoperca	Percichthyidae	y	n	6	17.5305	22.3884	0.0800306	0.0559558	0.0181105	0.0626686	0.0538154	0.0199167	0	0	0	0	0	0	0	0	6
708	Nanochromis	Cichlidae	y	y	8	NA	17.2161	0.120785	0.0873647	0.0308217	NA	NA	NA	0	0	0	0	0	0	0	0	8
709	Naso	Acanthuridae	y	n	20	17.723	49.9999	0.0599147	0.0470276	0.0212942	0.12992	0.116114	0.0571068	1	0	7	19	13	2	0	0	2
710	Naucrates	Carangidae	y	y	1	NA	17.8185	0	0	0	NA	NA	NA	1	1	1	1	1	1	1	1	0
711	Nautichthys	Hemitripteridae	y	n	3	14.7887	26.3581	0.0416802	0.0262973	0.00691708	0.0274172	0.0237842	0.00796439	0	0	0	0	0	0	3	0	0
712	Nealotus	Gempylidae	y	y	1	NA	23.6076	0	0	0	NA	NA	NA	1	1	1	1	1	1	1	0	0
713	Nebris	Sciaenidae	y	n	2	12.3372	45.7696	0.0151443	0.00885883	0.00208239	0	0	0	2	0	0	0	0	1	0	0	2
714	Nectoliparis	Liparidae	y	y	1	NA	24.4211	0	0	0	NA	NA	NA	0	0	0	0	0	1	1	0	0
715	Nelusetta	Monacanthidae	y	y	1	NA	10.5681	0	0	0	NA	NA	NA	0	0	0	1	1	0	0	0	0
716	Nemadactylus	Cheilodactylidae	y	n	7	4.51475	9.49714	0.204894	0.14597	0.049489	0.277482	0.239326	0.0918183	2	2	2	3	3	1	1	2	0
717	Nemanthias	Serranidae	y	y	1	NA	1.25978	0	0	0	NA	NA	NA	0	0	1	1	0	0	0	0	0
718	Nematistius	Nematistiidae	y	y	1	NA	70.2738	0	0	0	NA	NA	NA	0	0	0	0	0	1	0	0	0
719	Nematolebias	Rivulidae	y	y	3	NA	68.6588	0.016001	0.0100955	0.00265547	NA	NA	NA	0	0	0	0	0	0	0	0	3
720	Neobythites	Ophidiidae	y	y	52	NA	33.0156	0.119678	0.0992605	0.0547707	NA	NA	NA	9	1	11	22	16	3	1	0	1
721	Neoclinus	Chaenopsidae	y	y	11	NA	26.8455	0.0893221	0.0667434	0.0258199	NA	NA	NA	0	0	0	7	0	2	4	0	0
722	Neoditrema	Embiotocidae	y	y	1	NA	8.79389	0	0	0	NA	NA	NA	0	0	0	1	0	0	1	0	0
723	Neofundulus	Rivulidae	y	y	7	NA	22.1466	0.087865	0.0625963	0.0212224	NA	NA	NA	0	0	0	0	0	0	0	0	7
724	Neoglyphidodon	Pomacentridae	y	n	9	20.8668	23.9006	0.0919317	0.0673388	0.0245929	0.0720799	0.0626885	0.0255607	0	0	0	8	4	0	0	0	0
725	Neogobius	Gobiidae	y	n	4	23.0022	35.7225	0.0388073	0.0256502	0.00734451	0.030134	0.0257707	0.00880621	0	1	0	0	0	0	1	0	4
726	Neoheterandria	Poeciliidae	y	n	3	13.6034	26.1051	0.0420842	0.0265521	0.00698413	0.0298062	0.0258566	0.00865835	0	0	0	0	0	0	0	0	3
727	Neomerinthe	Scorpaenidae	y	y	11	NA	23.5969	0.101619	0.075932	0.0293745	NA	NA	NA	2	2	1	5	4	1	1	0	0
728	Neoodax	Odacidae	y	y	1	NA	2.69014	0	0	0	NA	NA	NA	0	0	0	1	1	0	0	1	1
729	Neopagetopsis	Channichthyidae	y	y	1	NA	7.21648	0	0	0	NA	NA	NA	0	0	0	0	0	0	0	1	0
730	Neoscorpis	Kyphosidae	y	y	1	NA	31.7946	0	0	0	NA	NA	NA	0	0	1	0	0	0	0	0	0
731	Neosebastes	Neosebastidae	y	y	12	NA	18.4848	0.13443	0.101262	0.0401377	NA	NA	NA	0	1	0	9	5	0	0	2	0
732	Neostethus	Phallostethidae	y	y	12	NA	93.7593	0.026503	0.0199639	0.00791321	NA	NA	NA	0	0	0	3	0	0	0	0	12
733	Neosynchiropus	Callionymidae	y	y	3	NA	39.9175	0.0275221	0.0173645	0.00456746	NA	NA	NA	0	0	1	2	1	0	1	0	0
734	Neozoarces	Zoarcidae	y	y	2	NA	25.5861	0.0270908	0.0158471	0.00372508	NA	NA	NA	0	0	0	0	0	0	2	0	0
735	Nes	Gobiidae	y	y	1	NA	26.9542	0	0	0	NA	NA	NA	1	0	0	0	0	0	0	0	0
736	Nesiarchus	Gempylidae	y	y	1	NA	34.69	0	0	0	NA	NA	NA	1	1	1	1	1	1	1	1	0
737	Nibea	Sciaenidae	y	n	10	5.41252	31.566	0.0729451	0.0540058	0.0203337	0.297355	0.259568	0.108598	0	0	0	10	1	0	2	0	5
738	Nicholsina	Scaridae	y	n	3	8.07311	12.6447	0.0868831	0.0548171	0.0144188	0.0502242	0.043569	0.0145895	1	1	0	0	0	1	1	0	0
739	Niphon	Serranidae	y	y	1	NA	63.345	0	0	0	NA	NA	NA	0	0	1	1	0	0	0	0	0
740	Nomorhamphus	Zenarchopteridae	y	n	21	16.6437	38.3125	0.0794655	0.0625878	0.028675	0.141277	0.126456	0.062851	0	0	0	1	0	0	0	0	21
741	Normanichthys	Normanichthyidae	y	y	1	NA	73.3191	0	0	0	NA	NA	NA	0	0	0	0	0	1	0	0	0
742	Nosferatu	Cichlidae	y	n	7	5.21527	8.42879	0.230865	0.164471	0.0557617	0.240211	0.20718	0.0794852	0	0	0	0	0	0	0	0	7
743	Notesthes	Tetrarogidae	y	y	1	NA	57.0058	0	0	0	NA	NA	NA	0	0	0	1	1	0	0	1	1
744	Notholebias	Rivulidae	y	y	3	NA	46.4285	0.0236625	0.0149293	0.00392693	NA	NA	NA	0	0	0	0	0	0	0	0	3
745	Notocirrhitus	Cirrhitidae	y	y	1	NA	44.1311	0	0	0	NA	NA	NA	0	0	0	0	1	0	0	0	0
746	Nototheniops	Nototheniidae	y	y	3	NA	5.60147	0.196129	0.123744	0.0325489	NA	NA	NA	0	0	0	0	0	0	0	3	0
747	Novaculichthys	Labridae	y	y	1	NA	41.3204	0	0	0	NA	NA	NA	0	0	1	1	1	1	0	0	0
748	Novaculoides	Labridae	y	y	1	NA	51.0111	0	0	0	NA	NA	NA	0	0	1	1	1	0	0	0	0
749	Nuchequula	Leiognathidae	y	n	7	17.8927	29.1137	0.0668383	0.0476166	0.0161437	0.0700153	0.0603877	0.0231679	0	0	0	7	1	0	1	0	3
750	Oblada	Sparidae	y	y	1	NA	12.6334	0	0	0	NA	NA	NA	0	1	0	0	0	0	1	0	0
751	Ocyurus	Lutjanidae	y	y	1	NA	6.69208	0	0	0	NA	NA	NA	1	0	0	0	0	0	0	0	0
752	Odax	Odacidae	y	n	2	9.6754	32.964	0.0210274	0.0123002	0.00289134	0	0	0	0	0	0	0	1	0	0	1	0
753	Odontamblyopus	Gobiidae	y	y	5	NA	24.9537	0.064497	0.044026	0.0134839	NA	NA	NA	0	0	0	5	0	1	0	0	4
754	Odontanthias	Serranidae	y	y	15	NA	56.9839	0.047523	0.0364917	0.0153634	NA	NA	NA	1	1	3	7	6	0	0	0	0
755	Odontesthes	Atherinopsidae	y	y	20	NA	32.6906	0.0916389	0.0719282	0.0325693	NA	NA	NA	4	1	0	0	0	1	1	3	20
756	Odontobutis	Odontobutidae	y	n	8	37.4232	60.7736	0.0342162	0.0247488	0.00873123	0.0370437	0.0320878	0.012713	0	0	0	0	0	0	0	0	8
757	Odontopyxis	Agonidae	y	y	1	NA	7.37364	0	0	0	NA	NA	NA	0	0	0	0	0	0	1	0	0
758	Odonus	Balistidae	y	y	1	NA	15.7551	0	0	0	NA	NA	NA	0	0	1	1	1	0	1	0	0
759	Oedalechilus	Mugilidae	y	y	2	NA	10.0588	0.0689095	0.0403095	0.0094753	NA	NA	NA	1	1	1	1	1	0	0	0	1
760	Oligolepis	Gobiidae	y	y	6	NA	40.4876	0.0442545	0.0309419	0.0100146	NA	NA	NA	0	0	2	2	0	0	0	0	5
761	Oligoplites	Carangidae	y	n	5	11.119	35.7319	0.045042	0.030746	0.00941658	0.0824077	0.0705052	0.0250806	3	0	0	0	0	3	1	0	5
762	Olisthops	Odacidae	y	y	1	NA	28.1358	0	0	0	NA	NA	NA	0	0	0	1	1	0	0	1	0
763	Opeatogenys	Gobiesocidae	y	y	2	NA	52.4047	0.0132268	0.00773719	0.00181873	NA	NA	NA	0	2	0	0	0	0	0	0	0
764	Ophidion	Ophidiidae	y	y	27	NA	52.9296	0.0622683	0.0498598	0.0242007	NA	NA	NA	12	4	1	2	3	5	5	0	1
765	Ophiocara	Eleotridae	y	y	2	NA	31.5597	0.021963	0.0128476	0.00302	NA	NA	NA	0	0	1	1	1	0	0	0	2
766	Ophiodon	Hexagrammidae	y	y	1	NA	35.2298	0	0	0	NA	NA	NA	0	0	0	0	0	0	1	0	0
767	Ophisternon	Synbranchidae	y	y	6	NA	18.0359	0.0993441	0.0694594	0.022481	NA	NA	NA	0	0	0	0	0	0	0	0	6
768	Ophthalmolepis	Labridae	y	y	1	NA	40.3249	0	0	0	NA	NA	NA	0	0	0	1	1	0	0	1	0
769	Opisthocentrus	Stichaeidae	y	y	3	NA	9.60861	0.114336	0.0721381	0.0189748	NA	NA	NA	0	0	0	0	0	0	3	0	0
770	Opistognathus	Opistognathidae	y	y	65	NA	98.1622	0.0425254	0.0356197	0.0203895	NA	NA	NA	14	0	9	28	9	12	0	1	0
771	Oplegnathus	Oplegnathidae	y	n	7	34.5404	46.3948	0.0419424	0.0298804	0.0101305	0.0362695	0.0312822	0.0120015	0	0	3	3	3	1	1	0	0
772	Opsanus	Batrachoididae	y	y	5	NA	41.3944	0.0388805	0.0265401	0.00812844	NA	NA	NA	5	0	0	0	0	0	1	0	0
773	Orestias	Cyprinodontidae	y	n	45	20.8325	54.4908	0.0698588	0.0575417	0.0309483	0.149455	0.13658	0.0784611	0	0	0	0	0	0	0	0	45
774	Orthonopias	Cottidae	y	y	1	NA	13.8081	0	0	0	NA	NA	NA	0	0	0	0	0	0	1	0	0
775	Orthopristis	Haemulidae	y	y	7	NA	14.3547	0.135559	0.0965742	0.0327421	NA	NA	NA	2	0	0	0	0	6	1	0	2
776	Osphronemus	Osphronemidae	y	n	4	19.7768	68.6133	0.0202045	0.0133544	0.00382381	0.0350485	0.0299737	0.0102424	0	0	0	0	0	0	0	0	4
777	Ostracoberyx	Ostracoberycidae	y	y	3	NA	29.0573	0.0378085	0.0238545	0.00627455	NA	NA	NA	0	1	1	3	2	0	0	0	0
778	Otolithes	Sciaenidae	y	n	2	13.6781	36.2128	0.019141	0.0111967	0.00263195	0	0	0	0	0	1	2	1	0	0	0	1
779	Otolithoides	Sciaenidae	y	y	2	NA	25.8254	0.0268397	0.0157002	0.00369056	NA	NA	NA	0	0	0	2	0	0	0	0	1
780	Otopharynx	Cichlidae	y	y	14	NA	0.879182	3.00172	2.29179	0.947368	NA	NA	NA	0	0	0	0	0	0	0	0	14
781	Oxyeleotris	Eleotridae	y	n	17	32.326	37.2069	0.0761475	0.0590542	0.025681	0.0662026	0.0588586	0.0279237	0	0	0	1	0	0	0	0	16
782	Oxyjulis	Labridae	y	y	1	NA	12.0421	0	0	0	NA	NA	NA	0	0	0	0	0	1	1	0	0
783	Oxylapia	Cichlidae	y	y	1	NA	28.7198	0	0	0	NA	NA	NA	0	0	0	0	0	0	0	0	1
784	Oxylebius	Hexagrammidae	y	y	1	NA	43.5852	0	0	0	NA	NA	NA	0	0	0	0	0	1	1	0	0
785	Oxyporhamphus	Hemiramphidae	y	y	2	NA	14.6784	0.0472223	0.0276233	0.00649324	NA	NA	NA	1	1	1	1	1	1	1	0	0
786	Oxyurichthys	Gobiidae	y	y	22	NA	36.6958	0.0842342	0.0665566	0.0308319	NA	NA	NA	1	0	6	17	6	0	0	0	7
787	Oxyzygonectes	Anablepidae	y	y	1	NA	48.1287	0	0	0	NA	NA	NA	0	0	0	0	0	0	0	0	1
788	Pachypanchax	Aplocheilidae	y	n	7	46.506	70.0604	0.0277748	0.0197871	0.00670855	0.0269377	0.0232335	0.00891362	0	0	0	0	0	0	0	0	7
789	Pagetopsis	Channichthyidae	y	n	2	2.76828	5.37937	0.128853	0.0753741	0.0177177	0	0	0	0	0	0	0	0	0	0	2	0
790	Pagothenia	Nototheniidae	y	y	2	NA	8.00572	0.0865815	0.0506469	0.0119053	NA	NA	NA	0	0	0	0	0	0	0	2	0
791	Pallidochromis	Cichlidae	y	y	1	NA	0.990017	0	0	0	NA	NA	NA	0	0	0	0	0	0	0	0	1
792	Pamphorichthys	Poeciliidae	y	n	6	6.29839	18.9959	0.0943235	0.0659492	0.0213449	0.174427	0.149786	0.0554349	0	0	0	0	0	0	0	0	6
793	Pampus	Stromateidae	y	n	5	30.2407	57.7786	0.0278552	0.0190142	0.00582347	0.0302999	0.0259236	0.00922171	0	0	2	5	0	0	2	0	1
794	Pandaka	Gobiidae	y	n	7	4.82341	33.7228	0.0577031	0.0411085	0.0139373	0.259726	0.224011	0.0859427	0	0	0	2	1	0	0	0	7
795	Pao	Tetraodontidae	y	y	13	NA	31.2763	0.0820094	0.0622168	0.0252094	NA	NA	NA	0	0	0	0	0	0	0	0	13
796	Paracanthurus	Acanthuridae	y	y	1	NA	9.22678	0	0	0	NA	NA	NA	1	0	1	1	1	0	1	0	0
797	Paracentropyge	Pomacanthidae	y	y	1	NA	15.944	0	0	0	NA	NA	NA	0	0	0	1	1	0	0	0	0
798	Parachaenichthys	Bathydraconidae	y	y	2	NA	8.9878	0.0771209	0.0451128	0.0106044	NA	NA	NA	0	0	0	0	0	0	0	2	0
799	Parachaetodon	Chaetodontidae	y	y	1	NA	15.6669	0	0	0	NA	NA	NA	0	0	0	1	0	0	0	0	0
800	Parachanna	Channidae	y	y	3	NA	71.2747	0.0154138	0.00972501	0.00255801	NA	NA	NA	0	0	0	0	0	0	0	0	3
801	Parachromis	Cichlidae	y	n	5	9.0587	10.6485	0.151142	0.103171	0.0315981	0.10115	0.0865408	0.0307849	0	0	0	0	0	0	0	0	5
802	Paraclinus	Labrisomidae	y	y	23	NA	56.4171	0.055577	0.0440453	0.020617	NA	NA	NA	11	0	0	0	0	13	0	0	0
803	Paracottus	Cottocomephoridae	y	y	1	NA	5.51007	0	0	0	NA	NA	NA	0	0	0	0	0	0	0	0	1
804	Paracyprichromis	Cichlidae	y	n	2	0.567289	6.21298	0.111564	0.065261	0.0153405	0	0	0	0	0	0	0	0	0	0	0	2
805	Paradiplospinus	Gempylidae	y	y	2	NA	16.3748	0.0423301	0.0247615	0.00582054	NA	NA	NA	1	1	0	0	1	2	0	2	0
806	Paragobiodon	Gobiidae	y	n	6	13.1059	62.4414	0.0286951	0.020063	0.00649353	0.0838258	0.0719837	0.0266407	0	0	5	6	6	0	0	0	0
807	Paraluteres	Monacanthidae	y	y	2	NA	21.2472	0.032623	0.0190832	0.00448578	NA	NA	NA	0	0	2	2	1	0	0	0	0
808	Parambassis	Ambassidae	y	n	18	3.70309	37.2493	0.0775953	0.0604385	0.026665	0.593349	0.528513	0.253975	0	0	0	1	0	0	0	0	18
809	Paranotothenia	Nototheniidae	y	y	2	NA	9.20283	0.0753189	0.0440587	0.0103566	NA	NA	NA	0	0	0	0	0	0	0	2	0
810	Paranthias	Serranidae	y	n	2	11.6679	19.4391	0.0356574	0.0208582	0.00490301	0	0	0	1	1	0	0	0	2	0	0	0
811	Parargyrops	Sparidae	y	y	1	NA	10.1439	0	0	0	NA	NA	NA	0	0	0	0	0	0	0	0	1
812	Parascolopsis	Nemipteridae	y	y	12	NA	43.7324	0.0568207	0.0428013	0.0169654	NA	NA	NA	0	0	4	12	0	0	0	0	0
813	Parasphaerichthys	Osphronemidae	y	n	2	35.1488	43.4333	0.0159589	0.00933535	0.0021944	0	0	0	0	0	0	0	0	0	0	0	2
814	Parastromateus	Carangidae	y	y	1	NA	10.1761	0	0	0	NA	NA	NA	0	0	0	1	1	0	0	0	1
815	Parequula	Gerreidae	y	y	2	NA	95.2846	0.00727449	0.00425531	0.00100027	NA	NA	NA	0	0	0	2	1	0	0	1	0
816	Paretroplus	Cichlidae	y	n	13	13.4284	27.6563	0.0927438	0.0703605	0.0285091	0.139391	0.122806	0.0547411	0	0	0	0	0	0	0	0	13
817	Parexocoetus	Exocoetidae	y	n	3	27.5197	39.6111	0.027735	0.0174988	0.00460279	0.0147336	0.0127813	0.00427996	2	1	1	1	2	1	1	0	0
818	Parophrys	Pleuronectidae	y	y	1	NA	5.34215	0	0	0	NA	NA	NA	0	0	0	0	0	0	1	0	0
819	Parosphromenus	Osphronemidae	y	n	20	26.4188	48.6829	0.0615356	0.0482998	0.0218703	0.0871569	0.0778949	0.03831	0	0	0	0	0	0	0	0	20
820	Patagonotothen	Nototheniidae	y	n	14	4.03409	10.1685	0.259531	0.19815	0.0819103	0.482367	0.426062	0.193277	2	0	0	0	0	2	0	14	0
821	Pegasus	Pegasidae	y	y	3	NA	117.112	0.00938089	0.00591868	0.00155682	NA	NA	NA	0	0	1	3	2	0	0	1	2
822	Pegusa	Soleidae	y	n	5	15.2927	25.17	0.0639428	0.0436477	0.013368	0.0599169	0.0512628	0.0182355	0	5	1	0	0	0	0	0	3
823	Peltorhamphus	Pleuronectidae	y	y	3	NA	80.2988	0.0136816	0.0086321	0.00227054	NA	NA	NA	0	0	0	0	1	0	0	3	0
824	Pelvicachromis	Cichlidae	y	n	8	17.1443	17.2161	0.120785	0.0873647	0.0308217	0.0808604	0.0700426	0.0277505	0	0	0	0	0	0	0	0	8
825	Pennahia	Sciaenidae	y	y	5	NA	25.8254	0.06232	0.04254	0.0130287	NA	NA	NA	0	0	1	5	0	0	1	0	0
826	Pentaceros	Pentacerotidae	y	n	6	14.0714	18.4406	0.0971637	0.067935	0.0219876	0.0780739	0.0670444	0.0248127	0	2	2	2	4	2	1	1	0
827	Pentanemus	Polynemidae	y	y	1	NA	19.2014	0	0	0	NA	NA	NA	0	1	0	0	0	0	0	0	1
828	Perca	Percidae	y	n	3	18.2798	35.4876	0.0309577	0.0195321	0.00513762	0.022181	0.0192419	0.00644334	0	0	0	0	0	0	0	0	3
829	Perccottus	Odontobutidae	y	y	1	NA	60.7736	0	0	0	NA	NA	NA	0	0	0	0	0	0	0	0	1
830	Percichthys	Percichthyidae	y	y	5	NA	33.3751	0.0482227	0.0329171	0.0100815	NA	NA	NA	0	0	0	0	0	0	0	0	5
831	Percina	Percidae	y	n	48	23.1334	31.3528	0.123472	0.102022	0.0555123	0.137379	0.125733	0.0729958	0	0	0	0	0	0	0	0	48
832	Periophthalmus	Gobiidae	y	n	18	30.7415	39.4106	0.0733399	0.0571239	0.0252026	0.0714743	0.0636643	0.0305936	0	1	6	11	5	0	1	0	17
833	Peristedion	Peristediidae	y	n	23	13.8947	56.329	0.055664	0.0441142	0.0206492	0.175775	0.157773	0.0799387	14	2	1	5	1	4	4	0	0
834	Pervagor	Monacanthidae	y	y	8	NA	11.9532	0.173965	0.125831	0.0443921	NA	NA	NA	0	1	4	5	7	0	0	0	0
835	Petalichthys	Belonidae	y	y	1	NA	8.50937	0	0	0	NA	NA	NA	0	1	1	0	0	0	0	0	0
836	Petenia	Cichlidae	y	y	1	NA	6.40932	0	0	0	NA	NA	NA	0	0	0	0	0	0	0	0	1
837	Petrotyx	Ophidiidae	y	y	2	NA	52.5578	0.0131883	0.00771465	0.00181343	NA	NA	NA	1	0	0	0	0	1	0	0	0
838	Petrus	Sparidae	y	y	1	NA	12.9864	0	0	0	NA	NA	NA	0	1	1	0	0	0	0	0	1
839	Phalloceros	Poeciliidae	y	y	22	NA	35.908	0.0860824	0.0680169	0.0315084	NA	NA	NA	0	0	0	0	0	0	0	0	22
840	Phalloptychus	Poeciliidae	y	y	2	NA	35.6077	0.0194662	0.011387	0.00267667	NA	NA	NA	0	0	0	0	0	0	0	0	2
841	Phanerodon	Embiotocidae	y	n	2	2.26581	8.66231	0.0800187	0.046808	0.0110029	0	0	0	0	0	0	0	0	2	1	0	0
842	Pharyngochromis	Cichlidae	y	y	2	NA	2.23364	0.310322	0.181527	0.0426703	NA	NA	NA	0	0	0	0	0	0	0	0	2
843	Philypnodon	Eleotridae	y	n	2	19.9764	31.162	0.0222433	0.0130115	0.00305854	0	0	0	0	0	0	1	1	0	0	1	2
844	Pholidapus	Stichaeidae	y	y	1	NA	9.60861	0	0	0	NA	NA	NA	0	0	0	0	0	0	1	0	0
845	Pholidichthys	Pholidichthyidae	y	y	2	NA	88.0042	0.0078763	0.00460734	0.00108302	NA	NA	NA	0	0	0	2	0	0	0	0	0
846	Photopectoralis	Leiognathidae	y	n	4	13.2238	15.7479	0.0880306	0.0581851	0.0166603	0.0524165	0.0448269	0.015318	0	0	0	4	1	0	0	0	2
847	Phrynorhombus	Scophthalmidae	y	y	1	NA	25.5847	0	0	0	NA	NA	NA	0	1	0	0	0	0	1	0	0
848	Phtheirichthys	Echeneidae	y	y	1	NA	8.32768	0	0	0	NA	NA	NA	1	1	1	1	1	1	1	0	0
849	Phycodurus	Syngnathidae	y	y	1	NA	19.7492	0	0	0	NA	NA	NA	0	0	0	1	0	0	0	0	0
850	Phyllopteryx	Syngnathidae	y	y	1	NA	19.7492	0	0	0	NA	NA	NA	0	0	0	1	1	0	0	1	0
851	Pictilabrus	Labridae	y	y	3	NA	15.7303	0.0698405	0.0440645	0.0115905	NA	NA	NA	0	0	0	3	1	0	0	1	0
852	Pinjalo	Lutjanidae	y	y	2	NA	17.4273	0.0397736	0.0232661	0.00546902	NA	NA	NA	0	0	1	2	0	0	0	0	0
853	Pituna	Rivulidae	y	y	6	NA	44.9539	0.0398577	0.0278677	0.00901958	NA	NA	NA	0	0	0	0	0	0	0	0	6
854	Placidochromis	Cichlidae	y	y	43	NA	0.612831	6.13742	5.04387	2.69023	NA	NA	NA	0	0	0	0	0	0	0	0	43
855	Plagiopsetta	Samaridae	y	y	3	NA	16.6415	0.0660164	0.0416517	0.0109558	NA	NA	NA	0	0	0	1	3	0	0	0	0
856	Platax	Ephippidae	y	n	5	11.3302	25.8867	0.0621724	0.0424393	0.0129979	0.0808715	0.0691909	0.024613	0	0	3	5	4	0	0	0	1
857	Platichthys	Pleuronectidae	y	n	2	3.05742	4.77004	0.145313	0.0850025	0.019981	0	0	0	0	1	0	0	0	0	2	0	2
858	Platybelone	Belonidae	y	y	2	NA	45.1614	0.0153482	0.00897813	0.00211043	NA	NA	NA	1	2	1	1	1	1	0	0	0
859	Plectobranchus	Stichaeidae	y	y	1	NA	17.8656	0	0	0	NA	NA	NA	0	0	0	0	0	0	1	0	0
860	Plectrogenium	Plectrogeniidae	y	y	2	NA	42.2846	0.0163924	0.00958895	0.00225402	NA	NA	NA	0	0	1	1	2	1	0	0	0
861	Plectropomus	Serranidae	y	n	7	15.3323	27.3881	0.0710495	0.0506167	0.0171609	0.0817074	0.070472	0.0270368	1	0	5	6	4	0	0	0	0
862	Plesiolebias	Rivulidae	y	y	8	NA	47.5442	0.043737	0.0316353	0.0111607	NA	NA	NA	0	0	0	0	0	0	0	0	8
863	Pleuragramma	Nototheniidae	y	y	1	NA	18.469	0	0	0	NA	NA	NA	0	0	0	0	0	0	0	1	0
864	Pleuronichthys	Pleuronectidae	y	n	7	18.9175	24.2517	0.0802381	0.0571628	0.0193802	0.0662224	0.0571163	0.0219129	0	0	0	2	0	4	5	0	0
865	Pleurosicya	Gobiidae	y	n	18	32.1746	44.1071	0.0655308	0.0510415	0.0225191	0.0682907	0.0608285	0.0292309	0	0	12	13	10	0	0	0	1
866	Podothecus	Agonidae	y	n	5	5.44428	8.5211	0.188877	0.128928	0.0394869	0.168303	0.143995	0.0512227	0	0	0	1	0	0	5	0	0
867	Poecilopsetta	Pleuronectidae	y	y	15	NA	67.4212	0.0401662	0.0308425	0.0129851	NA	NA	NA	3	0	4	5	6	1	1	0	0
868	Pogonias	Sciaenidae	y	y	1	NA	20.2582	0	0	0	NA	NA	NA	1	0	0	0	0	0	0	0	1
869	Pogonoperca	Serranidae	y	y	2	NA	11.8883	0.058305	0.0341062	0.00801714	NA	NA	NA	0	0	2	2	2	0	0	0	0
870	Polyamblyodon	Sparidae	y	y	2	NA	7.96244	0.0870521	0.0509222	0.01197	NA	NA	NA	0	0	2	0	0	0	0	0	0
871	Polycentropsis	Nandidae	y	y	1	NA	77.2891	0	0	0	NA	NA	NA	0	0	0	0	0	0	0	0	1
872	Polyprion	Polyprionidae	y	n	2	4.47363	16.1774	0.0428466	0.0250636	0.00589155	0	0	0	1	1	1	1	1	0	1	1	0
873	Polysteganus	Sparidae	y	y	5	NA	12.9864	0.123933	0.0845971	0.0259096	NA	NA	NA	0	2	5	0	0	0	0	0	0
874	Pomacanthus	Pomacanthidae	y	n	13	25.4327	39.5929	0.064783	0.0491479	0.0199141	0.0735981	0.064841	0.0289031	2	0	7	6	3	2	0	0	0
875	Pomacentrus	Pomacentridae	y	n	71	22.5204	29.1269	0.146349	0.123031	0.0713925	0.158502	0.146278	0.0900423	0	0	22	53	32	1	0	0	4
876	Pomatomus	Pomatomidae	y	y	1	NA	56.7952	0	0	0	NA	NA	NA	1	0	0	0	0	0	1	0	1
877	Pomoxis	Centrarchidae	y	n	2	3.90943	16.2296	0.0427088	0.0249831	0.00587261	0	0	0	0	0	0	0	0	0	0	0	2
878	Pontinus	Scorpaenidae	y	n	19	12.9078	49.6655	0.0592854	0.0463619	0.0207311	0.174413	0.155626	0.0756861	6	4	3	4	4	6	3	0	0
879	Porichthys	Batrachoididae	y	y	14	NA	41.2782	0.0639334	0.0488128	0.0201779	NA	NA	NA	8	0	0	0	0	9	2	0	0
880	Potamorrhaphis	Belonidae	y	n	4	8.16818	29.0372	0.047742	0.0315558	0.00903546	0.0848594	0.0725723	0.0247989	0	0	0	0	0	0	0	0	4
881	Premnas	Pomacentridae	y	y	1	NA	19.8709	0	0	0	NA	NA	NA	0	0	0	1	1	0	0	0	0
882	Priapella	Poeciliidae	y	n	6	4.37219	22.4233	0.0799062	0.0558688	0.0180823	0.251273	0.215775	0.0798571	0	0	0	0	0	0	0	0	6
883	Prionodraco	Bathydraconidae	y	y	1	NA	9.14705	0	0	0	NA	NA	NA	0	0	0	0	0	0	0	1	0
884	Prionurus	Acanthuridae	y	n	7	22.7389	38.781	0.0501769	0.0357467	0.0121194	0.0550934	0.0475177	0.0182303	0	1	0	2	2	2	0	0	2
885	Pristolepis	Pristolepididae	y	n	5	9.19684	76.31	0.0210908	0.0143967	0.00440928	0.099631	0.0852409	0.0303225	0	0	0	0	0	0	0	0	5
886	Pristotis	Pomacentridae	y	y	2	NA	6.38447	0.108568	0.063508	0.0149284	NA	NA	NA	0	0	1	1	1	0	0	0	0
887	Procottus	Abyssocottidae	y	n	4	1.11189	5.58471	0.24823	0.164071	0.046979	0.623395	0.533132	0.182178	0	0	0	0	0	0	0	0	4
888	Profundulus	Profundulidae	y	n	8	41.5183	44.7407	0.0464776	0.0336176	0.0118601	0.03339	0.0289229	0.0114591	0	0	0	0	0	0	0	0	8
889	Prognathodes	Chaetodontidae	y	n	11	21.0082	40.2293	0.0596056	0.0445386	0.0172299	0.0811466	0.0710734	0.0304337	4	3	1	1	0	2	0	0	0
890	Prognichthys	Exocoetidae	y	n	6	8.54673	11.9725	0.149656	0.104637	0.0338664	0.128542	0.110383	0.0408519	3	2	1	1	1	2	1	0	0
891	Promethichthys	Gempylidae	y	y	1	NA	23.6076	0	0	0	NA	NA	NA	1	1	1	1	1	1	1	0	0
892	Pronothobranchius	Nothobranchiidae	y	y	1	NA	13.4823	0	0	0	NA	NA	NA	0	0	0	0	0	0	0	0	1
893	Pronotogrammus	Serranidae	y	y	3	NA	27.2896	0.0402575	0.0253997	0.00668099	NA	NA	NA	1	0	0	0	0	2	0	0	0
894	Proterorhinus	Gobiidae	y	n	5	4.16625	15.3235	0.105031	0.0716946	0.0219579	0.219932	0.188166	0.0669357	0	1	0	0	0	0	0	0	5
895	Protogobius	Rhyacichthyidae	y	y	1	NA	36.1733	0	0	0	NA	NA	NA	0	0	0	0	1	0	0	0	1
896	Protomelas	Cichlidae	y	y	15	NA	5.32569	0.508488	0.390455	0.164386	NA	NA	NA	0	0	0	0	0	0	0	0	15
897	Protonibea	Sciaenidae	y	y	1	NA	27.3828	0	0	0	NA	NA	NA	0	0	1	1	0	0	0	0	1
898	Psednos	Liparidae	y	n	35	1.29477	8.70877	0.408249	0.331892	0.170128	2.21058	2.00764	1.10412	2	1	4	0	3	6	11	8	0
899	Psenopsis	Centrolophidae	y	y	6	NA	32.7751	0.0546683	0.038223	0.0123711	NA	NA	NA	0	0	3	5	1	0	2	1	0
900	Psettichthys	Pleuronectidae	y	y	1	NA	2.22749	0	0	0	NA	NA	NA	0	0	0	0	0	1	1	0	0
901	Psettodes	Psettodidae	y	n	3	39.8849	104.146	0.0105488	0.00665554	0.00175064	0.0101659	0.00881881	0.00295307	0	2	0	1	1	0	0	0	1
902	Pseudaesopia	Soleidae	y	y	1	NA	7.42645	0	0	0	NA	NA	NA	0	0	0	1	1	0	0	0	0
903	Pseudaphritis	Pseudaphritidae	y	y	2	NA	63.4116	0.0109309	0.00639418	0.00150304	NA	NA	NA	0	0	0	1	1	1	0	1	1
904	Pseudaphya	Gobiidae	y	y	1	NA	23.7195	0	0	0	NA	NA	NA	0	1	0	0	0	0	0	0	0
905	Pseudapocryptes	Gobiidae	y	y	2	NA	51.3121	0.0135085	0.00790194	0.00185746	NA	NA	NA	0	0	0	0	0	0	0	0	2
906	Pseudochaenichthys	Channichthyidae	y	y	1	NA	3.12854	0	0	0	NA	NA	NA	0	0	0	0	0	0	0	1	0
907	Pseudocheilinus	Labridae	y	y	7	NA	42.6157	0.0456618	0.0325301	0.0110289	NA	NA	NA	0	0	2	4	6	1	0	0	0
908	Pseudocoris	Labridae	y	n	7	9.1831	16.0153	0.121503	0.0865606	0.0293472	0.13642	0.117662	0.0451413	0	0	2	7	3	0	0	0	0
909	Pseudodax	Labridae	y	y	1	NA	43.517	0	0	0	NA	NA	NA	0	0	1	1	1	0	0	0	0
910	Pseudogobiopsis	Gobiidae	y	y	4	NA	40.3939	0.0343194	0.0226839	0.00649515	NA	NA	NA	0	0	0	0	0	0	0	0	4
911	Pseudogobius	Gobiidae	y	y	8	NA	62.8759	0.0330722	0.0239214	0.0084393	NA	NA	NA	0	0	0	2	0	0	0	0	8
912	Pseudojuloides	Labridae	y	n	11	17.3595	42.7716	0.0560628	0.0418913	0.0162058	0.0982026	0.0860121	0.0368305	0	0	4	4	4	0	0	0	0
913	Pseudomugil	Pseudomugilidae	y	n	15	43.6795	45.3602	0.059701	0.0458429	0.0193004	0.0461293	0.0408409	0.0188279	0	0	0	2	0	0	0	0	15
914	Pseudopoecilia	Poeciliidae	y	y	3	NA	26.65	0.0412237	0.0260093	0.00684133	NA	NA	NA	0	0	0	0	0	0	0	0	3
915	Pseudosimochromis	Cichlidae	y	y	1	NA	3.53104	0	0	0	NA	NA	NA	0	0	0	0	0	0	0	0	1
916	Pseudosphromenus	Osphronemidae	y	n	2	30.4749	37.9599	0.01826	0.0106814	0.00251081	0	0	0	0	0	0	0	0	0	0	0	2
917	Pseudotriacanthus	Triacanthidae	y	y	1	NA	24.2332	0	0	0	NA	NA	NA	0	0	1	1	0	0	0	0	1
918	Pseudotylosurus	Belonidae	y	n	2	22.4965	40.7916	0.0169924	0.00993991	0.00233651	0	0	0	0	0	0	0	0	0	0	0	2
919	Psilotris	Gobiidae	y	y	6	NA	41.2756	0.0434097	0.0303512	0.00982336	NA	NA	NA	6	0	0	0	0	0	0	0	0
920	Psychrolutes	Psychrolutidae	y	y	11	NA	12.2471	0.195793	0.146301	0.0565969	NA	NA	NA	0	2	2	3	2	1	4	3	0
921	Pteragogus	Labridae	y	n	10	17.0897	64.9758	0.0354376	0.0262367	0.00987835	0.0941759	0.0822083	0.0343942	0	0	7	5	3	0	0	0	0
922	Pterochromis	Cichlidae	y	y	1	NA	15.2434	0	0	0	NA	NA	NA	0	0	0	0	0	0	0	0	1
923	Pterogobius	Gobiidae	y	n	4	34.9203	40.8645	0.0339242	0.0224227	0.00642035	0.0198494	0.0169753	0.0058007	0	0	0	3	0	0	2	0	0
924	Pterogymnus	Sparidae	y	y	1	NA	24.0608	0	0	0	NA	NA	NA	0	1	1	0	0	0	0	0	0
925	Pterophyllum	Cichlidae	y	y	3	NA	30.0289	0.0365851	0.0230827	0.00607153	NA	NA	NA	0	0	0	0	0	0	0	0	3
926	Pterycombus	Bramidae	y	y	2	NA	9.92027	0.0698718	0.0408724	0.00960762	NA	NA	NA	2	2	1	1	1	0	1	1	0
927	Ptilichthys	Ptilichthyidae	y	y	1	NA	33.108	0	0	0	NA	NA	NA	0	0	0	0	0	0	1	0	0
928	Ptychochromis	Cichlidae	y	n	9	9.56399	18.2006	0.120723	0.0884277	0.0322949	0.157265	0.136774	0.0557686	0	0	0	0	0	0	0	0	9
929	Ptychochromoides	Cichlidae	y	n	3	6.32763	28.7198	0.0382528	0.0241348	0.00634829	0.0640785	0.0555875	0.0186141	0	0	0	0	0	0	0	0	3
930	Pugnaso	Syngnathidae	y	y	1	NA	19.8244	0	0	0	NA	NA	NA	0	0	0	1	0	0	0	1	1
931	Pungitius	Gasterosteidae	y	n	9	11.3829	24.3007	0.0904182	0.0662301	0.0241881	0.132135	0.114919	0.0468572	0	2	0	0	0	0	5	0	8
932	Pungu	Cichlidae	y	y	1	NA	1.33372	0	0	0	NA	NA	NA	0	0	0	0	0	0	0	0	1
933	Pygoplites	Pomacanthidae	y	y	1	NA	19.3453	0	0	0	NA	NA	NA	0	0	1	1	1	0	0	0	0
934	Quietula	Gobiidae	y	y	2	NA	0.0607313	11.4133	6.67638	1.56937	NA	NA	NA	0	0	0	0	0	2	0	0	1
935	Quintana	Poeciliidae	y	y	1	NA	23.9801	0	0	0	NA	NA	NA	0	0	0	0	0	0	0	0	1
936	Rachovia	Rivulidae	y	y	4	NA	12.7879	0.108407	0.0716529	0.0205166	NA	NA	NA	0	0	0	0	0	0	0	0	4
937	Rachycentron	Rachycentridae	y	y	1	NA	46.7502	0	0	0	NA	NA	NA	1	1	1	1	1	0	1	1	1
938	Racovitzia	Bathydraconidae	y	y	2	NA	13.3183	0.0520447	0.0304442	0.00715633	NA	NA	NA	0	0	0	0	0	0	0	2	0
939	Radulinus	Cottidae	y	y	3	NA	25.4683	0.0431365	0.0272161	0.00715877	NA	NA	NA	0	0	0	0	0	1	3	0	0
940	Ranzania	Molidae	y	y	1	NA	41.505	0	0	0	NA	NA	NA	1	1	1	1	1	1	1	0	0
941	Rastrelliger	Scombridae	y	n	3	11.1441	30.894	0.0355607	0.0224363	0.00590153	0.0363838	0.0315627	0.0105691	0	0	0	3	1	0	0	0	1
942	Rathbunella	Bathymasteridae	y	y	2	NA	13.0856	0.0529702	0.0309856	0.00728359	NA	NA	NA	0	0	0	0	0	2	2	0	0
943	Ratsirakia	Eleotridae	y	y	1	NA	32.8057	0	0	0	NA	NA	NA	0	0	0	0	0	0	0	0	1
944	Redigobius	Gobiidae	y	y	14	NA	40.3939	0.0653331	0.0498814	0.0206197	NA	NA	NA	0	0	2	5	4	0	0	1	13
945	Remora	Echeneidae	y	n	5	18.5533	20.3274	0.0791757	0.0540458	0.0165526	0.0493869	0.0422537	0.0150308	5	4	4	4	4	5	3	1	0
946	Renova	Rivulidae	y	y	1	NA	18.0451	0	0	0	NA	NA	NA	0	0	0	0	0	0	0	0	1
947	Rhadinocentrus	Melanotaeniidae	y	y	1	NA	26.663	0	0	0	NA	NA	NA	0	0	0	0	0	0	0	0	1
948	Rhamphocottus	Rhamphocottidae	y	y	1	NA	15.198	0	0	0	NA	NA	NA	0	0	0	0	0	1	1	0	0
949	Rhinecanthus	Balistidae	y	n	7	8.16991	15.9657	0.12188	0.0868293	0.0294383	0.153339	0.132253	0.0507395	0	1	5	5	4	0	0	0	0
950	Rhinesomus	Ostraciidae	y	y	1	NA	7.93145	0	0	0	NA	NA	NA	1	0	0	1	0	0	1	0	0
951	Rhinogobiops	Gobiidae	y	y	1	NA	52.7767	0	0	0	NA	NA	NA	0	0	0	0	0	1	1	0	0
952	Rhinogobius	Gobiidae	y	n	64	41.2008	61.8489	0.0672426	0.0562862	0.0321408	0.0841182	0.0774693	0.0469939	0	0	0	3	0	0	2	0	63
953	Rhinoliparis	Liparidae	y	y	2	NA	9.44852	0.0733604	0.0429131	0.0100873	NA	NA	NA	0	0	0	0	0	0	2	0	0
954	Rhodichthys	Liparidae	y	y	2	NA	8.70877	0.0795918	0.0465582	0.0109442	NA	NA	NA	0	0	0	0	0	0	2	0	0
955	Rhomboplites	Lutjanidae	y	y	1	NA	12.2199	0	0	0	NA	NA	NA	1	0	0	0	0	0	1	0	0
956	Rhombosolea	Pleuronectidae	y	y	4	NA	45.4488	0.0305023	0.0201609	0.00577274	NA	NA	NA	0	0	0	1	1	0	0	4	2
957	Rhyacichthys	Rhyacichthyidae	y	y	2	NA	36.1733	0.0191618	0.011209	0.00263482	NA	NA	NA	0	0	0	1	1	0	0	0	2
958	Risor	Gobiidae	y	y	1	NA	7.1956	0	0	0	NA	NA	NA	1	0	0	0	0	0	0	0	0
959	Rocio	Cichlidae	y	y	3	NA	12.106	0.0907494	0.0572565	0.0150604	NA	NA	NA	0	0	0	0	0	0	0	0	3
960	Romanichthys	Percidae	y	y	1	NA	8.32902	0	0	0	NA	NA	NA	0	0	0	0	0	0	0	0	1
961	Roncador	Sciaenidae	y	y	1	NA	22.6106	0	0	0	NA	NA	NA	0	0	0	0	0	1	0	0	0
962	Ronquilus	Bathymasteridae	y	y	1	NA	13.0856	0	0	0	NA	NA	NA	0	0	0	0	0	0	1	0	0
963	Ruscarius	Cottidae	y	n	2	20.5346	23.0897	0.0300198	0.0175605	0.00412783	0	0	0	0	0	0	0	0	1	1	0	0
964	Ruvettus	Gempylidae	y	y	1	NA	44.0656	0	0	0	NA	NA	NA	1	1	1	1	1	1	1	0	0
965	Rypticus	Serranidae	y	n	10	12.2641	45.5544	0.0505458	0.0374222	0.0140898	0.131232	0.114555	0.0479274	7	1	1	0	0	4	1	0	0
966	Sagamia	Gobiidae	y	y	1	NA	40.8645	0	0	0	NA	NA	NA	0	0	0	1	0	0	0	0	0
967	Salarias	Blenniidae	y	y	13	NA	36.7009	0.0698879	0.0530208	0.0214833	NA	NA	NA	1	0	2	12	6	1	0	0	2
968	Saloptia	Serranidae	y	y	1	NA	27.3881	0	0	0	NA	NA	NA	0	0	0	1	1	0	0	0	0
969	Samariscus	Samaridae	y	y	19	NA	16.6415	0.176934	0.138364	0.0618706	NA	NA	NA	0	0	4	13	5	0	0	0	0
970	Sandelia	Anabantidae	y	y	2	NA	39.4061	0.0175898	0.0102894	0.00241867	NA	NA	NA	0	0	0	0	0	0	0	0	2
971	Sarpa	Sparidae	y	y	1	NA	18.0657	0	0	0	NA	NA	NA	0	1	1	0	0	0	0	0	1
972	Satanoperca	Cichlidae	y	n	8	28.1738	43.3635	0.0479538	0.0346854	0.0122368	0.0492051	0.0426223	0.0168867	0	0	0	0	0	0	0	0	8
973	Scartelaos	Gobiidae	y	y	4	NA	23.9832	0.0578027	0.0382055	0.0109395	NA	NA	NA	0	0	0	4	1	0	0	0	1
974	Scartella	Blenniidae	y	n	7	9.00578	40.1036	0.0485221	0.0345678	0.0117197	0.139107	0.119978	0.0460301	3	4	2	1	0	0	0	0	0
975	Schuettea	Monodactylidae	y	y	2	NA	61.5147	0.011268	0.00659135	0.00154939	NA	NA	NA	0	0	0	1	1	0	0	1	1
976	Schwetzochromis	Cichlidae	y	y	1	NA	6.45128	0	0	0	NA	NA	NA	0	0	0	0	0	0	0	0	1
977	Sciaenops	Sciaenidae	y	y	1	NA	27.8891	0	0	0	NA	NA	NA	1	0	0	0	0	0	0	0	1
978	Scolichthys	Poeciliidae	y	y	2	NA	22.4233	0.0309119	0.0180823	0.0042505	NA	NA	NA	0	0	0	0	0	0	0	0	2
979	Scolopsis	Nemipteridae	y	n	17	29.075	43.8105	0.0646697	0.0501529	0.0218101	0.073605	0.0654398	0.0310459	0	0	7	17	8	0	0	0	1
980	Scomber	Scombridae	y	n	4	19.8495	30.894	0.0448727	0.0296592	0.00849241	0.0349202	0.029864	0.0102049	3	3	1	3	3	2	3	2	2
981	Scomberoides	Carangidae	y	n	4	3.13001	35.7319	0.0387971	0.0256435	0.00734258	0.221452	0.189387	0.0647161	0	0	3	4	3	0	0	0	3
982	Scomberomorus	Scombridae	y	n	18	27.1046	44.0913	0.0655542	0.0510598	0.0225272	0.0810646	0.0722066	0.0346986	4	2	4	10	4	2	3	1	7
983	Scombrolabrax	Scombrolabracidae	y	y	1	NA	71.6817	0	0	0	NA	NA	NA	1	1	1	1	1	1	1	0	0
984	Scombrops	Scombropidae	y	n	3	7.07545	33.9016	0.0324059	0.0204458	0.00537796	0.0573059	0.0497124	0.0166467	1	1	1	1	0	0	0	0	0
985	Scorpaenichthys	Cottidae	y	y	1	NA	21.8615	0	0	0	NA	NA	NA	0	0	0	0	0	1	1	0	0
986	Scriptaphyosemion	Nothobranchiidae	y	n	13	30.7967	45.7525	0.0560614	0.0425312	0.0172331	0.0607793	0.0535474	0.023869	0	0	0	0	0	0	0	0	13
987	Sebastes	Sebastidae	y	n	107	9.6321	15.6423	0.29873	0.255013	0.156691	0.413169	0.384159	0.249113	2	1	1	16	2	43	84	1	2
988	Sebastiscus	Sebastidae	y	n	3	8.83297	19.5578	0.0561727	0.035441	0.00932221	0.0459036	0.039821	0.0133345	0	0	0	3	0	0	1	0	0
989	Secutor	Leiognathidae	y	n	7	20.8287	34.6698	0.056127	0.0399857	0.0135566	0.0601461	0.0518756	0.0199022	0	0	1	6	3	0	0	0	6
990	Selaroides	Carangidae	y	y	1	NA	16.4532	0	0	0	NA	NA	NA	0	0	0	1	1	0	0	0	1
991	Selenotoca	Scatophagidae	y	y	2	NA	12.4753	0.0555616	0.0325014	0.00763991	NA	NA	NA	0	0	0	2	1	0	0	0	2
992	Semicossyphus	Labridae	y	n	3	6.43997	25.2997	0.0434239	0.0273974	0.00720647	0.0629607	0.0546179	0.0182894	0	0	0	1	0	2	2	0	0
993	Seriola	Carangidae	y	n	9	13.7475	17.8185	0.123311	0.0903238	0.0329874	0.109407	0.0951526	0.0387977	5	4	3	5	5	4	6	2	2
994	Seriolella	Centrolophidae	y	n	6	9.31539	10.4792	0.170982	0.119548	0.0386924	0.117935	0.101274	0.037481	0	0	0	2	3	1	0	5	2
995	Seriolina	Carangidae	y	y	1	NA	21.784	0	0	0	NA	NA	NA	0	0	0	1	1	0	0	0	1
996	Seriphus	Sciaenidae	y	y	1	NA	41.3625	0	0	0	NA	NA	NA	0	0	0	0	0	1	1	0	0
997	Sicydium	Gobiidae	y	n	17	20.0241	27.9692	0.101297	0.0785586	0.0341629	0.106875	0.0950187	0.0450787	2	0	0	0	0	3	0	0	17
998	Siganus	Siganidae	y	n	29	21.586	90.9407	0.0370274	0.0297782	0.0146799	0.123884	0.111944	0.0594283	1	0	7	25	18	0	0	0	8
999	Sillaginodes	Sillaginidae	y	y	1	NA	59.0441	0	0	0	NA	NA	NA	0	0	0	1	1	0	0	1	1
1000	Sillaginopodys	Sillaginidae	y	y	1	NA	59.0441	0	0	0	NA	NA	NA	0	0	1	1	0	0	0	0	1
1001	Sillago	Sillaginidae	y	n	30	72.2761	78.8463	0.0431371	0.0347618	0.0172611	0.0374681	0.0338888	0.0181087	0	1	5	23	9	0	1	3	8
1002	Similiparma	Pomacentridae	y	y	1	NA	8.63572	0	0	0	NA	NA	NA	0	1	0	0	0	0	0	0	0
1003	Siniperca	Percichthyidae	y	n	9	14.3105	51.4154	0.0427347	0.0313026	0.0114321	0.105103	0.0914089	0.0372712	0	0	0	0	0	0	0	0	9
1004	Siphamia	Apogonidae	y	y	23	NA	29.4256	0.106557	0.0844471	0.0395285	NA	NA	NA	0	0	7	19	10	0	0	1	1
1005	Siphonognathus	Odacidae	y	y	6	NA	21.0035	0.0853077	0.0596454	0.0193046	NA	NA	NA	0	0	0	6	1	0	0	5	2
1006	Solegnathus	Syngnathidae	y	n	5	10.6339	32.3591	0.0497369	0.0339507	0.0103981	0.0861674	0.0737218	0.0262248	0	0	1	3	3	0	1	1	0
1007	Sparidentex	Sparidae	y	y	4	NA	15.295	0.0906371	0.0599079	0.0171536	NA	NA	NA	0	0	3	3	0	0	0	0	2
1008	Sparisoma	Scaridae	y	n	15	15.7782	17.1263	0.158122	0.121418	0.0511184	0.127702	0.113062	0.0521222	12	3	0	0	0	0	0	0	0
1009	Sparodon	Sparidae	y	y	1	NA	11.9014	0	0	0	NA	NA	NA	0	0	1	0	0	0	0	0	0
1010	Sparus	Sparidae	y	y	1	NA	25.8153	0	0	0	NA	NA	NA	0	1	1	1	1	0	1	1	1
1011	Sphaeramia	Apogonidae	y	y	2	NA	36.7159	0.0188787	0.0110433	0.00259588	NA	NA	NA	0	0	1	2	2	0	0	0	0
1012	Sphaerichthys	Osphronemidae	y	n	4	24.347	43.4333	0.0319178	0.0210965	0.00604062	0.0284695	0.0243473	0.0083198	0	0	0	0	0	0	0	0	4
1013	Sphyraena	Sphyraenidae	y	n	27	62.4263	65.8199	0.0500736	0.0400951	0.0194612	0.0416922	0.0375984	0.0196821	7	7	10	13	11	6	6	3	6
1014	Spinachia	Gasterosteidae	y	y	1	NA	21.6452	0	0	0	NA	NA	NA	0	1	0	0	0	0	1	0	1
1015	Spondyliosoma	Sparidae	y	y	2	NA	25.0546	0.0276655	0.0161833	0.0038041	NA	NA	NA	0	2	1	0	0	0	1	0	1
1016	Stellerina	Agonidae	y	y	1	NA	14.1044	0	0	0	NA	NA	NA	0	0	0	0	0	0	1	0	0
1017	Stenotomus	Sparidae	y	y	2	NA	11.9538	0.0579855	0.0339193	0.00797321	NA	NA	NA	2	0	0	0	0	0	2	0	0
1018	Stephanolepis	Monacanthidae	y	y	5	NA	11.9532	0.134645	0.0919095	0.0281491	NA	NA	NA	2	1	3	2	1	0	3	0	0
1019	Stethojulis	Labridae	y	n	10	13.077	34.6429	0.0664663	0.0492091	0.0185277	0.123074	0.107434	0.0449481	0	0	5	5	8	0	0	0	0
1020	Stichaeus	Stichaeidae	y	y	5	NA	20.2915	0.0793158	0.0541414	0.0165819	NA	NA	NA	0	0	0	0	0	0	5	0	0
1021	Stigmatopora	Syngnathidae	y	n	4	3.28279	74.4691	0.0186157	0.0123043	0.00352313	0.211146	0.180573	0.0617043	0	0	0	3	3	0	0	3	2
1022	Stomatepia	Cichlidae	y	n	3	1.43537	2.1597	0.508688	0.320946	0.0844199	0.282481	0.24505	0.0820576	0	0	0	0	0	0	0	0	3
1023	Suezichthys	Labridae	y	y	11	NA	44.1441	0.0543197	0.0405889	0.0157019	NA	NA	NA	0	1	4	5	5	1	0	1	0
1024	Sufflamen	Balistidae	y	n	5	8.75761	15.9657	0.100806	0.0688106	0.0210746	0.104628	0.0895161	0.0318432	0	0	3	3	3	2	0	0	0
1025	Symphorichthys	Lutjanidae	y	y	1	NA	16.6952	0	0	0	NA	NA	NA	0	0	0	1	1	0	0	0	0
1026	Symphorus	Lutjanidae	y	y	1	NA	16.6952	0	0	0	NA	NA	NA	0	0	0	1	1	0	0	0	0
1027	Symphurus	Cynoglossidae	y	n	75	52.1768	54.6331	0.079027	0.0665821	0.038955	0.0694627	0.0641742	0.0397993	27	7	8	17	6	21	10	0	8
1028	Symphysodon	Cichlidae	y	n	3	1.28514	16.4158	0.0669239	0.0422243	0.0111064	0.315503	0.273696	0.09165	0	0	0	0	0	0	0	0	3
1029	Synagrops	Acropomatidae	y	n	13	25.8241	45.9152	0.0558628	0.0423805	0.017172	0.0724828	0.0638583	0.0284651	4	2	3	6	4	0	3	0	0
1030	Synanceia	Synanceiidae	y	y	5	NA	44.5768	0.0361048	0.0246454	0.00754815	NA	NA	NA	0	0	2	4	2	0	0	0	1
1031	Synaptura	Soleidae	y	y	7	NA	84.1162	0.0231336	0.0164807	0.00558755	NA	NA	NA	0	2	2	4	0	0	0	0	6
1032	Synapturichthys	Soleidae	y	y	1	NA	20.5433	0	0	0	NA	NA	NA	0	1	0	0	0	0	0	0	1
1033	Synbranchus	Synbranchidae	y	y	3	NA	18.0359	0.0609125	0.0384315	0.0101088	NA	NA	NA	0	0	0	0	0	0	0	0	3
1034	Syngnathoides	Syngnathidae	y	y	1	NA	72.071	0	0	0	NA	NA	NA	0	0	1	1	1	0	1	0	0
1035	Taeniacara	Cichlidae	y	y	1	NA	43.3635	0	0	0	NA	NA	NA	0	0	0	0	0	0	0	0	1
1036	Taeniamia	Apogonidae	y	n	14	8.38552	47.9364	0.0550533	0.0420328	0.0173753	0.232056	0.204969	0.0929814	0	0	7	10	8	0	0	0	1
1037	Taenianotus	Scorpaenidae	y	y	1	NA	34.1561	0	0	0	NA	NA	NA	0	0	1	1	1	0	0	0	0
1038	Taenioides	Gobiidae	y	y	13	NA	24.9537	0.102788	0.0779808	0.0315968	NA	NA	NA	0	0	2	7	1	0	0	0	10
1039	Tanakius	Pleuronectidae	y	y	1	NA	9.58433	0	0	0	NA	NA	NA	0	0	0	1	0	0	1	0	0
1040	Tanganicodus	Cichlidae	y	y	1	NA	2.09785	0	0	0	NA	NA	NA	0	0	0	0	0	0	0	0	1
1041	Taractes	Bramidae	y	y	2	NA	31.6001	0.021935	0.0128311	0.00301614	NA	NA	NA	1	2	0	2	2	1	1	0	0
1042	Taractichthys	Bramidae	y	y	2	NA	25.2121	0.0274926	0.0160822	0.00378034	NA	NA	NA	1	2	2	1	2	1	1	1	0
1043	Tarphops	Paralichthyidae	y	y	2	NA	24.078	0.0287876	0.0168397	0.0039584	NA	NA	NA	0	0	0	2	0	0	0	0	0
1044	Tateurndina	Eleotridae	y	y	1	NA	32.8057	0	0	0	NA	NA	NA	0	0	0	0	0	0	0	0	1
1045	Tathicarpus	Antennariidae	y	y	1	NA	23.2171	0	0	0	NA	NA	NA	0	0	0	1	1	0	0	0	0
1046	Taurulus	Cottidae	y	y	1	NA	13.0093	0	0	0	NA	NA	NA	0	1	0	0	0	0	1	0	1
1047	Tautoga	Labridae	y	y	1	NA	20.7964	0	0	0	NA	NA	NA	1	0	0	0	0	0	1	0	1
1048	Tautogolabrus	Labridae	y	y	1	NA	12.1127	0	0	0	NA	NA	NA	0	0	0	0	0	0	1	0	0
1049	Teixeirichthys	Pomacentridae	y	y	1	NA	6.38447	0	0	0	NA	NA	NA	0	0	1	1	0	0	0	0	0
1050	Teleocichla	Cichlidae	y	n	8	22.6014	30.0402	0.069222	0.0500688	0.0176639	0.0613368	0.0531309	0.0210502	0	0	0	0	0	0	0	0	8
1051	Teleogramma	Cichlidae	y	y	5	NA	26.6477	0.0603969	0.0412273	0.0126267	NA	NA	NA	0	0	0	0	0	0	0	0	5
1052	Tephrinectes	Paralichthyidae	y	y	1	NA	6.5844	0	0	0	NA	NA	NA	0	0	0	1	0	0	0	0	0
1053	Teramulus	Atherinidae	y	y	2	NA	29.3085	0.02365	0.0138344	0.00325196	NA	NA	NA	0	0	1	0	0	0	0	0	2
1054	Terranatos	Rivulidae	y	y	1	NA	14.0907	0	0	0	NA	NA	NA	0	0	0	0	0	0	0	0	1
1055	Tetractenos	Tetraodontidae	y	n	2	5.46448	29.9371	0.0231535	0.0135439	0.00318368	0	0	0	0	0	0	1	2	0	0	2	1
1056	Tetragonurus	Tetragonuridae	y	y	3	NA	40.6231	0.027044	0.0170629	0.00448812	NA	NA	NA	1	2	2	2	3	1	2	1	0
1057	Tetrosomus	Ostraciidae	y	y	3	NA	22.7905	0.0482048	0.0304139	0.00799989	NA	NA	NA	0	0	1	3	1	0	1	0	0
1058	Thamnaconus	Monacanthidae	y	y	14	NA	44.3188	0.0595471	0.0454638	0.0187936	NA	NA	NA	0	0	5	8	6	1	1	1	0
1059	Thorogobius	Gobiidae	y	y	4	NA	43.356	0.0319747	0.0211341	0.0060514	NA	NA	NA	0	3	0	0	0	0	1	0	0
1060	Thunnus	Scombridae	y	n	8	5.21916	19.2478	0.108035	0.0781428	0.0275683	0.265616	0.230081	0.091157	6	5	1	2	3	5	6	2	3
1061	Thyrsites	Gempylidae	y	y	1	NA	11.3557	0	0	0	NA	NA	NA	0	0	0	1	1	0	0	1	1
1062	Tilesina	Agonidae	y	y	1	NA	14.1044	0	0	0	NA	NA	NA	0	0	0	0	0	0	1	0	0
1063	Tilodon	Kyphosidae	y	y	1	NA	31.7083	0	0	0	NA	NA	NA	0	0	0	1	0	0	0	1	0
1064	Tomeurus	Poeciliidae	y	y	1	NA	40.006	0	0	0	NA	NA	NA	0	0	0	0	0	0	0	0	1
1065	Tonlesapia	Callionymidae	y	y	2	NA	46.2989	0.0149711	0.00875755	0.00205858	NA	NA	NA	0	0	0	0	0	0	0	0	2
1066	Torquigener	Tetraodontidae	y	y	21	NA	18.129	0.167936	0.132268	0.0605996	NA	NA	NA	0	0	5	14	16	0	0	0	4
1067	Tosana	Serranidae	y	y	1	NA	12.3144	0	0	0	NA	NA	NA	0	0	0	1	1	0	0	0	0
1068	Totoaba	Sciaenidae	y	y	1	NA	14.3206	0	0	0	NA	NA	NA	0	0	0	0	0	1	0	0	1
1069	Toxotes	Toxotidae	y	n	7	48.8022	98.5433	0.0197468	0.0140679	0.00476951	0.0256702	0.0221404	0.00849422	0	0	0	0	0	0	0	0	7
1070	Trachidermus	Cottidae	y	y	1	NA	11.7966	0	0	0	NA	NA	NA	0	0	0	0	0	0	1	0	1
1071	Trachinotus	Carangidae	y	n	20	19.7084	55.8489	0.0536399	0.0421024	0.0190641	0.116833	0.104417	0.051354	9	4	6	4	5	5	4	0	12
1072	Trachinus	Trachinidae	y	n	7	27.0523	27.2285	0.0714659	0.0509134	0.0172615	0.0463089	0.0399411	0.0153235	0	7	0	0	0	0	1	0	0
1073	Trachurus	Carangidae	y	n	14	8.11902	19.2385	0.137176	0.104733	0.0432939	0.239673	0.211697	0.0960335	1	6	4	4	3	2	4	2	4
1074	Trachyscorpia	Sebastidae	y	y	6	NA	13.9017	0.128888	0.0901158	0.0291666	NA	NA	NA	1	0	1	1	1	2	1	2	0
1075	Trematocara	Cichlidae	y	n	9	4.58352	11.9896	0.183261	0.134236	0.0490248	0.328149	0.285394	0.116367	0	0	0	0	0	0	0	0	9
1076	Trichiurus	Trichiuridae	y	n	9	12.5545	37.2139	0.0590432	0.0432483	0.0157948	0.119804	0.104194	0.0424844	1	1	2	8	2	1	1	0	3
1077	Trichodon	Trichodontidae	y	y	1	NA	24.7284	0	0	0	NA	NA	NA	0	0	0	0	0	0	1	0	0
1078	Trichogaster	Osphronemidae	y	n	4	30.6989	49.8529	0.0278077	0.0183799	0.00526277	0.0225789	0.0193096	0.00659835	0	0	0	0	0	0	0	0	4
1079	Trichopodus	Osphronemidae	y	n	6	29.2097	49.8529	0.0359409	0.0251292	0.00813323	0.0376112	0.0322979	0.0119532	0	0	0	0	0	0	0	0	6
1080	Trichopsis	Osphronemidae	y	n	3	13.7515	50.4627	0.0217708	0.0137358	0.003613	0.0294852	0.0255781	0.00856511	0	0	0	0	0	0	0	0	3
1081	Tridentiger	Gobiidae	y	n	9	48.9511	52.7767	0.0416325	0.0304952	0.0111372	0.0307261	0.0267228	0.010896	0	0	0	6	0	0	3	0	8
1082	Trigla	Triglidae	y	y	1	NA	53.3639	0	0	0	NA	NA	NA	0	1	0	0	0	0	1	0	0
1083	Triglachromis	Cichlidae	y	y	1	NA	7.00118	0	0	0	NA	NA	NA	0	0	0	0	0	0	0	0	1
1084	Trigloporus	Triglidae	y	y	1	NA	6.54954	0	0	0	NA	NA	NA	0	1	1	0	0	0	1	0	0
1085	Triglops	Cottidae	y	n	10	12.3792	26.4839	0.0869428	0.0643692	0.0242356	0.130011	0.11349	0.0474818	1	0	0	0	0	0	10	0	0
1086	Trigonectes	Rivulidae	y	n	6	15.4358	21.1037	0.0849027	0.0593623	0.019213	0.071173	0.0611184	0.0226195	0	0	0	0	0	0	0	0	6
1087	Trimma	Gobiidae	y	y	81	NA	64.1813	0.0684693	0.0578607	0.0342347	NA	NA	NA	1	0	24	61	26	0	0	0	0
1088	Triodon	Triodontidae	y	y	1	NA	84.6006	0	0	0	NA	NA	NA	0	0	1	1	1	0	0	0	0
1089	Tripterygion	Tripterygiidae	y	n	4	40.2966	42.8745	0.0323338	0.0213715	0.00611935	0.0172011	0.0147105	0.00502678	0	4	0	0	0	0	0	0	0
1090	Triso	Serranidae	y	y	1	NA	10.7555	0	0	0	NA	NA	NA	0	0	0	1	1	0	0	0	0
1091	Tristramella	Cichlidae	y	y	2	NA	5.05404	0.137147	0.0802259	0.0188582	NA	NA	NA	0	0	0	0	0	0	0	0	2
1092	Trixiphichthys	Triacanthidae	y	y	1	NA	24.2332	0	0	0	NA	NA	NA	0	0	0	1	1	0	0	0	0
1093	Tropheops	Cichlidae	y	y	8	NA	2.09229	0.993859	0.718867	0.253611	NA	NA	NA	0	0	0	0	0	0	0	0	8
1094	Typhlogobius	Gobiidae	y	y	1	NA	37.2831	0	0	0	NA	NA	NA	0	0	0	0	0	1	1	0	0
1095	Uaru	Cichlidae	y	n	2	9.20877	18.0742	0.0383501	0.0224334	0.00527328	0	0	0	0	0	0	0	0	0	0	0	2
1096	Upeneichthys	Mullidae	y	n	3	14.2961	56.8721	0.0193172	0.0121878	0.00320582	0.0283619	0.0246037	0.00823882	0	0	0	2	2	0	0	2	0
1097	Uranoscopus	Uranoscopidae	y	n	23	15.7377	77.4644	0.0404766	0.032078	0.0150153	0.155191	0.139297	0.0705773	0	5	10	13	1	0	1	0	0
1098	Uraspis	Carangidae	y	y	3	NA	10.1761	0.10796	0.0681152	0.0179166	NA	NA	NA	1	1	1	2	2	1	1	0	0
1099	Urocampus	Syngnathidae	y	y	2	NA	72.071	0.00961756	0.00562591	0.00132245	NA	NA	NA	0	0	0	1	1	0	1	1	2
1100	Valencia	Valenciidae	y	n	3	23.2488	56.9734	0.0192829	0.0121662	0.00320012	0.0174403	0.0151293	0.0050662	0	0	0	0	0	0	0	0	3
1101	Valenciennea	Gobiidae	y	y	15	NA	52.2171	0.0518614	0.039823	0.0167659	NA	NA	NA	0	0	6	13	10	0	0	0	2
1102	Vanderhorstia	Gobiidae	y	y	25	NA	27.8649	0.115517	0.0920494	0.0439182	NA	NA	NA	0	0	5	21	4	0	0	0	0
1103	Variabilichromis	Cichlidae	y	y	1	NA	8.80809	0	0	0	NA	NA	NA	0	0	0	0	0	0	0	0	1
1104	Variola	Serranidae	y	n	2	9.45649	57.909	0.0119696	0.00700177	0.00164586	0	0	0	0	0	2	2	2	0	0	0	0
1105	Verasper	Pleuronectidae	y	n	2	10.0137	21.9745	0.0315432	0.0184516	0.0043373	0	0	0	0	0	0	1	0	0	2	0	0
1106	Virididentex	Sparidae	y	y	1	NA	7.46256	0	0	0	NA	NA	NA	0	1	0	0	0	0	0	0	0
1107	Wattsia	Lethrinidae	y	y	1	NA	31.601	0	0	0	NA	NA	NA	0	0	1	1	1	0	0	0	0
1108	Wetmorella	Labridae	y	y	3	NA	19.5827	0.0561012	0.0353959	0.00931034	NA	NA	NA	0	0	2	3	3	0	0	0	0
1109	Xanthichthys	Balistidae	y	n	6	5.36886	15.2604	0.117412	0.0820924	0.0265698	0.204627	0.175719	0.0650325	0	0	5	4	4	2	0	0	0
1110	Xenentodon	Belonidae	y	y	2	NA	39.6466	0.0174831	0.010227	0.00240399	NA	NA	NA	0	0	0	1	0	0	0	0	2
1111	Xenochromis	Cichlidae	y	y	1	NA	3.26072	0	0	0	NA	NA	NA	0	0	0	0	0	0	0	0	1
1112	Xenodexia	Poeciliidae	y	y	1	NA	35.3965	0	0	0	NA	NA	NA	0	0	0	0	0	0	0	0	1
1113	Xenoophorus	Goodeidae	y	y	1	NA	10.4482	0	0	0	NA	NA	NA	0	0	0	0	0	0	0	0	1
1114	Xenophallus	Poeciliidae	y	y	1	NA	16.6694	0	0	0	NA	NA	NA	0	0	0	0	0	0	0	0	1
1115	Xenotaenia	Goodeidae	y	y	1	NA	12.0945	0	0	0	NA	NA	NA	0	0	0	0	0	0	0	0	1
1116	Xiphias	Xiphiidae	y	y	1	NA	42.8446	0	0	0	NA	NA	NA	1	1	0	0	0	1	1	0	0
1117	Xiphocheilus	Labridae	y	y	1	NA	18.8059	0	0	0	NA	NA	NA	0	0	0	1	1	0	0	0	1
1118	Xiphophorus	Poeciliidae	y	n	28	8.31797	24.7618	0.13457	0.107995	0.0528367	0.317272	0.286413	0.151012	0	0	0	0	0	0	0	0	28
1119	Xystreurys	Paralichthyidae	y	n	2	35.8444	78.3727	0.00884424	0.00517355	0.00121612	0	0	0	0	0	0	0	0	1	1	1	0
1120	Zalanthias	Serranidae	y	y	1	NA	70.5384	0	0	0	NA	NA	NA	0	0	0	1	1	0	0	0	0
1121	Zalembius	Embiotocidae	y	y	1	NA	10.7704	0	0	0	NA	NA	NA	0	0	0	0	0	1	1	0	0
1122	Zalieutes	Ogcocephalidae	y	y	2	NA	30.5622	0.0226799	0.0132669	0.00311857	NA	NA	NA	1	0	0	0	0	1	0	0	0
1123	Zanclorhynchus	Congiopodidae	y	y	1	NA	28.7568	0	0	0	NA	NA	NA	0	0	0	0	0	0	0	1	0
1124	Zanclus	Zanclidae	y	y	1	NA	53.9001	0	0	0	NA	NA	NA	0	0	0	1	1	0	0	0	0
1125	Zaniolepis	Hexagrammidae	y	n	2	8.10296	46.9052	0.0147776	0.00864435	0.00203197	0	0	0	0	0	0	0	0	2	2	0	0
1126	Zaprora	Zaproridae	y	y	1	NA	37.1354	0	0	0	NA	NA	NA	0	0	0	0	0	0	1	0	0
1127	Zebrus	Gobiidae	y	y	1	NA	40.192	0	0	0	NA	NA	NA	0	1	0	0	0	0	0	0	0
1128	Zeugopterus	Scophthalmidae	y	y	2	NA	35.3274	0.0196207	0.0114774	0.00269791	NA	NA	NA	0	2	0	0	0	0	2	0	1
1129	Zoarces	Zoarcidae	y	n	6	14.8093	18.5331	0.0966789	0.067596	0.0218779	0.0741839	0.063704	0.0235764	1	1	0	1	0	0	6	0	4
1130	Zoogoneticus	Goodeidae	y	n	3	7.77051	9.44995	0.116256	0.0733493	0.0192934	0.05218	0.0452657	0.0151577	0	0	0	0	0	0	0	0	3
1131	Zosterisessor	Gobiidae	y	y	1	NA	19.5931	0	0	0	NA	NA	NA	0	1	0	0	0	0	0	0	1
1132	Abudefduf	Pomacentridae	n	NA	20	NA	NA	NA	NA	NA	NA	NA	NA	6	3	11	11	10	5	1	0	1
1133	Abyssocottus	Abyssocottidae	n	NA	3	NA	NA	NA	NA	NA	NA	NA	NA	0	0	0	0	0	0	0	0	3
1134	Acanthopagrus	Sparidae	n	NA	20	NA	NA	NA	NA	NA	NA	NA	NA	0	1	8	14	6	0	1	2	11
1135	Acanthurus	Acanthuridae	n	NA	38	NA	NA	NA	NA	NA	NA	NA	NA	4	1	12	28	26	3	1	0	3
1136	Acentrogobius	Gobiidae	n	NA	20	NA	NA	NA	NA	NA	NA	NA	NA	0	1	4	16	5	0	1	0	18
1137	Achirus	Achiridae	n	NA	9	NA	NA	NA	NA	NA	NA	NA	NA	6	0	0	0	0	5	0	0	7
1138	Aequidens	Cichlidae	n	NA	17	NA	NA	NA	NA	NA	NA	NA	NA	0	0	0	0	0	0	0	0	17
1139	Agonopsis	Agonidae	n	NA	4	NA	NA	NA	NA	NA	NA	NA	NA	2	0	0	0	0	2	1	1	0
1140	Ambassis	Ambassidae	n	NA	20	NA	NA	NA	NA	NA	NA	NA	NA	0	0	5	10	5	0	0	1	20
1141	Amblycirrhitus	Cirrhitidae	n	NA	5	NA	NA	NA	NA	NA	NA	NA	NA	1	1	1	3	2	1	0	0	0
1142	Amblygobius	Gobiidae	n	NA	14	NA	NA	NA	NA	NA	NA	NA	NA	0	0	8	11	6	0	0	0	5
1143	Ammodytes	Ammodytidae	n	NA	6	NA	NA	NA	NA	NA	NA	NA	NA	1	1	0	1	0	0	6	0	4
1144	Amphilophus	Cichlidae	n	NA	27	NA	NA	NA	NA	NA	NA	NA	NA	0	0	0	0	0	0	0	0	27
1145	Amphiprion	Pomacentridae	n	NA	29	NA	NA	NA	NA	NA	NA	NA	NA	0	0	13	19	13	0	0	0	1
1146	Anablepsoides	Rivulidae	n	NA	49	NA	NA	NA	NA	NA	NA	NA	NA	0	0	0	0	0	0	0	0	49
1147	Anisotremus	Haemulidae	n	NA	8	NA	NA	NA	NA	NA	NA	NA	NA	4	0	0	0	0	6	0	0	0
1148	Antennarius	Antennariidae	n	NA	11	NA	NA	NA	NA	NA	NA	NA	NA	3	3	6	8	6	0	0	0	3
1149	Aphyosemion	Nothobranchiidae	n	NA	97	NA	NA	NA	NA	NA	NA	NA	NA	0	0	0	0	0	0	0	0	97
1150	Apistogramma	Cichlidae	n	NA	87	NA	NA	NA	NA	NA	NA	NA	NA	0	0	0	0	0	0	0	0	87
1151	Apogon	Apogonidae	n	NA	50	NA	NA	NA	NA	NA	NA	NA	NA	17	3	17	17	18	7	4	1	0
1152	Apolemichthys	Pomacanthidae	n	NA	9	NA	NA	NA	NA	NA	NA	NA	NA	0	0	6	2	4	0	0	0	0
1153	Archocentrus	Cichlidae	n	NA	3	NA	NA	NA	NA	NA	NA	NA	NA	0	0	0	0	0	0	0	0	3
1154	Arothron	Tetraodontidae	n	NA	16	NA	NA	NA	NA	NA	NA	NA	NA	1	3	12	13	9	2	0	3	5
1155	Artedius	Cottidae	n	NA	5	NA	NA	NA	NA	NA	NA	NA	NA	0	0	0	0	0	2	5	0	0
1156	Astatotilapia	Cichlidae	n	NA	8	NA	NA	NA	NA	NA	NA	NA	NA	0	0	0	0	0	0	0	0	8
1157	Atherinomorus	Atherinidae	n	NA	11	NA	NA	NA	NA	NA	NA	NA	NA	1	0	4	10	7	1	0	0	6
1158	Atractoscion	Sciaenidae	n	NA	2	NA	NA	NA	NA	NA	NA	NA	NA	0	1	1	0	0	1	1	0	0
1159	Bairdiella	Sciaenidae	n	NA	5	NA	NA	NA	NA	NA	NA	NA	NA	3	0	0	1	0	4	1	0	5
1160	Balistes	Balistidae	n	NA	7	NA	NA	NA	NA	NA	NA	NA	NA	3	2	1	2	1	3	2	0	0
1161	Balistoides	Balistidae	n	NA	2	NA	NA	NA	NA	NA	NA	NA	NA	0	0	1	2	2	0	0	0	1
1162	Bathyagonus	Agonidae	n	NA	4	NA	NA	NA	NA	NA	NA	NA	NA	0	0	0	0	0	0	4	0	0
1163	Bathygobius	Gobiidae	n	NA	28	NA	NA	NA	NA	NA	NA	NA	NA	9	3	11	12	9	4	0	0	11
1164	Blennius	Blenniidae	n	NA	2	NA	NA	NA	NA	NA	NA	NA	NA	0	2	0	0	0	0	0	0	0
1165	Bodianus	Labridae	n	NA	43	NA	NA	NA	NA	NA	NA	NA	NA	2	4	12	23	24	2	0	2	0
1166	Bothrocarina	Zoarcidae	n	NA	2	NA	NA	NA	NA	NA	NA	NA	NA	0	0	0	0	0	0	2	0	0
1167	Brachyrhaphis	Poeciliidae	n	NA	12	NA	NA	NA	NA	NA	NA	NA	NA	0	0	0	0	0	0	0	0	12
1168	Brama	Bramidae	n	NA	8	NA	NA	NA	NA	NA	NA	NA	NA	3	2	2	5	7	3	2	2	1
1169	Branchiostegus	Malacanthidae	n	NA	16	NA	NA	NA	NA	NA	NA	NA	NA	0	1	1	14	2	0	0	1	0
1170	Brotula	Ophidiidae	n	NA	6	NA	NA	NA	NA	NA	NA	NA	NA	0	2	1	1	3	3	0	0	0
1171	Butis	Eleotridae	n	NA	6	NA	NA	NA	NA	NA	NA	NA	NA	0	1	2	5	2	1	0	0	6
1172	Caesio	Caesionidae	n	NA	9	NA	NA	NA	NA	NA	NA	NA	NA	0	0	8	6	5	0	0	0	1
1173	Calamus	Sparidae	n	NA	13	NA	NA	NA	NA	NA	NA	NA	NA	11	0	0	0	0	2	0	0	0
1174	Callionymus	Callionymidae	n	NA	106	NA	NA	NA	NA	NA	NA	NA	NA	2	6	22	69	24	2	10	0	9
1175	Cantherhines	Monacanthidae	n	NA	12	NA	NA	NA	NA	NA	NA	NA	NA	3	0	3	6	9	1	1	0	1
1176	Caquetaia	Cichlidae	n	NA	4	NA	NA	NA	NA	NA	NA	NA	NA	0	0	0	0	0	0	0	0	4
1177	Carangoides	Carangidae	n	NA	20	NA	NA	NA	NA	NA	NA	NA	NA	2	0	8	18	14	2	1	0	4
1178	Caranx	Carangidae	n	NA	18	NA	NA	NA	NA	NA	NA	NA	NA	7	5	6	8	7	7	3	0	14
1179	Cataetyx	Bythitidae	n	NA	12	NA	NA	NA	NA	NA	NA	NA	NA	1	4	1	4	2	2	3	3	0
1180	Caulolatilus	Malacanthidae	n	NA	11	NA	NA	NA	NA	NA	NA	NA	NA	8	0	0	0	0	3	3	0	1
1181	Centrolabrus	Labridae	n	NA	3	NA	NA	NA	NA	NA	NA	NA	NA	0	3	0	0	0	0	1	0	0
1182	Centropyge	Pomacanthidae	n	NA	33	NA	NA	NA	NA	NA	NA	NA	NA	2	1	6	19	21	0	0	0	1
1183	Cephalopholis	Serranidae	n	NA	24	NA	NA	NA	NA	NA	NA	NA	NA	2	4	11	16	12	1	0	0	1
1184	Chaetobranchus	Cichlidae	n	NA	2	NA	NA	NA	NA	NA	NA	NA	NA	0	0	0	0	0	0	0	0	2
1185	Chaetodon	Chaetodontidae	n	NA	88	NA	NA	NA	NA	NA	NA	NA	NA	5	5	36	55	45	5	1	0	4
1186	Cheilinus	Labridae	n	NA	7	NA	NA	NA	NA	NA	NA	NA	NA	0	0	6	5	5	1	0	0	1
1187	Cheilodactylus	Cheilodactylidae	n	NA	16	NA	NA	NA	NA	NA	NA	NA	NA	0	1	4	9	8	1	0	3	2
1188	Cheilopogon	Exocoetidae	n	NA	28	NA	NA	NA	NA	NA	NA	NA	NA	9	8	7	17	10	11	6	2	0
1189	Cheimerius	Sparidae	n	NA	2	NA	NA	NA	NA	NA	NA	NA	NA	0	1	1	1	0	0	0	0	0
1190	Chelidonichthys	Triglidae	n	NA	9	NA	NA	NA	NA	NA	NA	NA	NA	0	6	2	2	1	0	3	1	1
1191	Chelon	Mugilidae	n	NA	7	NA	NA	NA	NA	NA	NA	NA	NA	0	2	4	5	2	0	1	0	6
1192	Chetia	Cichlidae	n	NA	6	NA	NA	NA	NA	NA	NA	NA	NA	0	0	0	0	0	0	0	0	6
1193	Chilomycterus	Diodontidae	n	NA	5	NA	NA	NA	NA	NA	NA	NA	NA	5	2	2	1	1	1	3	0	1
1194	Chionodraco	Channichthyidae	n	NA	3	NA	NA	NA	NA	NA	NA	NA	NA	0	0	0	0	0	0	0	3	0
1195	Chirolophis	Stichaeidae	n	NA	8	NA	NA	NA	NA	NA	NA	NA	NA	0	0	0	0	0	0	8	0	0
1196	Chirostoma	Atherinopsidae	n	NA	23	NA	NA	NA	NA	NA	NA	NA	NA	0	0	0	0	0	0	0	0	23
1197	Choerodon	Labridae	n	NA	24	NA	NA	NA	NA	NA	NA	NA	NA	0	0	2	23	13	0	0	0	0
1198	Chromis	Pomacentridae	n	NA	99	NA	NA	NA	NA	NA	NA	NA	NA	9	7	23	52	45	7	2	1	0
1199	Chrysiptera	Pomacentridae	n	NA	33	NA	NA	NA	NA	NA	NA	NA	NA	0	0	7	27	18	0	0	0	1
1200	Chrysoblephus	Sparidae	n	NA	6	NA	NA	NA	NA	NA	NA	NA	NA	0	3	6	0	0	0	0	0	0
1201	Cichlasoma	Cichlidae	n	NA	39	NA	NA	NA	NA	NA	NA	NA	NA	0	0	0	0	0	0	0	0	39
1202	Cirrhitus	Cirrhitidae	n	NA	4	NA	NA	NA	NA	NA	NA	NA	NA	0	1	1	1	2	1	0	0	0
1203	Citharichthys	Paralichthyidae	n	NA	24	NA	NA	NA	NA	NA	NA	NA	NA	13	1	0	1	0	11	8	0	4
1204	Clinocottus	Cottidae	n	NA	5	NA	NA	NA	NA	NA	NA	NA	NA	0	0	0	0	0	2	5	0	1
1205	Coptodon	Cichlidae	n	NA	6	NA	NA	NA	NA	NA	NA	NA	NA	0	1	0	0	0	0	0	0	6
1206	Coreoperca	Percichthyidae	n	NA	5	NA	NA	NA	NA	NA	NA	NA	NA	0	0	0	0	0	0	0	0	5
1207	Coris	Labridae	n	NA	27	NA	NA	NA	NA	NA	NA	NA	NA	0	2	7	13	18	0	0	0	0
1208	Coryphopterus	Gobiidae	n	NA	13	NA	NA	NA	NA	NA	NA	NA	NA	12	0	0	0	0	1	0	0	1
1209	Cottiusculus	Cottidae	n	NA	3	NA	NA	NA	NA	NA	NA	NA	NA	0	0	0	2	0	0	3	0	0
1210	Cottus	Cottidae	n	NA	67	NA	NA	NA	NA	NA	NA	NA	NA	0	0	0	1	0	0	5	0	67
1211	Cryptoheros	Cichlidae	n	NA	9	NA	NA	NA	NA	NA	NA	NA	NA	0	0	0	0	0	0	0	0	9
1212	Ctenochaetus	Acanthuridae	n	NA	9	NA	NA	NA	NA	NA	NA	NA	NA	0	0	2	4	7	1	0	0	0
1213	Ctenochromis	Cichlidae	n	NA	6	NA	NA	NA	NA	NA	NA	NA	NA	0	0	0	0	0	0	0	0	6
1214	Ctenogobius	Gobiidae	n	NA	23	NA	NA	NA	NA	NA	NA	NA	NA	11	1	0	1	0	2	1	0	20
1215	Ctenopoma	Anabantidae	n	NA	17	NA	NA	NA	NA	NA	NA	NA	NA	0	0	0	0	0	0	0	0	17
1216	Cubiceps	Nomeidae	n	NA	10	NA	NA	NA	NA	NA	NA	NA	NA	5	5	7	6	6	3	3	2	0
1217	Cynoscion	Sciaenidae	n	NA	25	NA	NA	NA	NA	NA	NA	NA	NA	15	0	0	0	0	14	2	0	17
1218	Decapterus	Carangidae	n	NA	10	NA	NA	NA	NA	NA	NA	NA	NA	4	2	5	8	7	4	2	1	0
1219	Dendrochirus	Scorpaenidae	n	NA	5	NA	NA	NA	NA	NA	NA	NA	NA	0	1	3	4	5	0	0	0	0
1220	Dentex	Sparidae	n	NA	13	NA	NA	NA	NA	NA	NA	NA	NA	0	8	0	4	2	0	0	0	0
1221	Dermatolepis	Serranidae	n	NA	3	NA	NA	NA	NA	NA	NA	NA	NA	1	0	1	0	0	1	0	0	0
1222	Dicologlossa	Soleidae	n	NA	2	NA	NA	NA	NA	NA	NA	NA	NA	1	2	0	0	0	0	0	0	1
1223	Diplodus	Sparidae	n	NA	15	NA	NA	NA	NA	NA	NA	NA	NA	3	11	6	1	0	0	1	1	5
1224	Diplotaxodon	Cichlidae	n	NA	7	NA	NA	NA	NA	NA	NA	NA	NA	0	0	0	0	0	0	0	0	7
1225	Eleotris	Eleotridae	n	NA	30	NA	NA	NA	NA	NA	NA	NA	NA	2	3	2	8	4	1	0	0	28
1226	Epinephelus	Serranidae	n	NA	86	NA	NA	NA	NA	NA	NA	NA	NA	11	8	44	57	39	7	2	2	13
1227	Epiplatys	Nothobranchiidae	n	NA	36	NA	NA	NA	NA	NA	NA	NA	NA	0	0	0	0	0	0	0	0	36
1228	Equulites	Leiognathidae	n	NA	10	NA	NA	NA	NA	NA	NA	NA	NA	0	0	5	8	3	0	0	0	0
1229	Etheostoma	Percidae	n	NA	156	NA	NA	NA	NA	NA	NA	NA	NA	0	0	0	0	0	0	0	0	156
1230	Etropus	Paralichthyidae	n	NA	9	NA	NA	NA	NA	NA	NA	NA	NA	6	0	0	0	0	4	4	0	2
1231	Eucinostomus	Gerreidae	n	NA	10	NA	NA	NA	NA	NA	NA	NA	NA	8	1	0	0	0	4	0	0	9
1232	Eviota	Gobiidae	n	NA	91	NA	NA	NA	NA	NA	NA	NA	NA	0	1	19	74	49	1	0	1	1
1233	Favonigobius	Gobiidae	n	NA	9	NA	NA	NA	NA	NA	NA	NA	NA	0	0	2	7	5	0	0	2	8
1234	Fundulopanchax	Nothobranchiidae	n	NA	29	NA	NA	NA	NA	NA	NA	NA	NA	0	0	0	0	0	0	0	0	29
1235	Fundulus	Fundulidae	n	NA	39	NA	NA	NA	NA	NA	NA	NA	NA	8	0	0	0	0	1	4	0	38
1236	Gambusia	Poeciliidae	n	NA	45	NA	NA	NA	NA	NA	NA	NA	NA	0	0	0	0	0	0	0	0	45
1237	Gazza	Leiognathidae	n	NA	5	NA	NA	NA	NA	NA	NA	NA	NA	0	0	3	4	3	0	0	0	3
1238	Genypterus	Ophidiidae	n	NA	6	NA	NA	NA	NA	NA	NA	NA	NA	1	1	1	1	2	2	0	3	1
1239	Geophagus	Cichlidae	n	NA	27	NA	NA	NA	NA	NA	NA	NA	NA	0	0	0	0	0	0	0	0	27
1240	Gerres	Gerreidae	n	NA	28	NA	NA	NA	NA	NA	NA	NA	NA	1	1	6	22	5	1	1	1	20
1241	Glossogobius	Gobiidae	n	NA	28	NA	NA	NA	NA	NA	NA	NA	NA	0	0	2	7	3	1	1	1	28
1242	Glossolepis	Melanotaeniidae	n	NA	9	NA	NA	NA	NA	NA	NA	NA	NA	0	0	0	0	0	0	0	0	9
1243	Gnathochromis	Cichlidae	n	NA	2	NA	NA	NA	NA	NA	NA	NA	NA	0	0	0	0	0	0	0	0	2
1244	Gnatholepis	Gobiidae	n	NA	10	NA	NA	NA	NA	NA	NA	NA	NA	1	0	3	7	5	1	0	0	2
1245	Gobiocichla	Cichlidae	n	NA	2	NA	NA	NA	NA	NA	NA	NA	NA	0	0	0	0	0	0	0	0	2
1246	Gobiodon	Gobiidae	n	NA	27	NA	NA	NA	NA	NA	NA	NA	NA	0	0	13	22	13	0	0	0	2
1247	Gobiomorphus	Eleotridae	n	NA	9	NA	NA	NA	NA	NA	NA	NA	NA	0	0	0	0	5	0	0	3	9
1248	Gobiopterus	Gobiidae	n	NA	9	NA	NA	NA	NA	NA	NA	NA	NA	0	0	0	2	1	0	0	0	8
1249	Gobius	Gobiidae	n	NA	25	NA	NA	NA	NA	NA	NA	NA	NA	0	20	3	1	0	0	3	0	9
1250	Greenwoodochromis	Cichlidae	n	NA	2	NA	NA	NA	NA	NA	NA	NA	NA	0	0	0	0	0	0	0	0	2
1251	Gymnelus	Zoarcidae	n	NA	12	NA	NA	NA	NA	NA	NA	NA	NA	0	0	0	0	0	0	12	0	0
1252	Gyrinomimus	Cetomimidae	n	NA	5	NA	NA	NA	NA	NA	NA	NA	NA	2	0	0	1	2	0	1	1	0
1253	Haemulon	Haemulidae	n	NA	23	NA	NA	NA	NA	NA	NA	NA	NA	19	0	1	0	0	9	1	0	0
1254	Halichoeres	Labridae	n	NA	79	NA	NA	NA	NA	NA	NA	NA	NA	16	0	20	43	20	12	3	0	2
1255	Haplochromis	Cichlidae	n	NA	228	NA	NA	NA	NA	NA	NA	NA	NA	0	0	0	0	0	0	0	0	228
1256	Haplotaxodon	Cichlidae	n	NA	2	NA	NA	NA	NA	NA	NA	NA	NA	0	0	0	0	0	0	0	0	2
1257	Hemichromis	Cichlidae	n	NA	11	NA	NA	NA	NA	NA	NA	NA	NA	0	0	0	0	0	0	0	0	11
1258	Hemiramphus	Hemiramphidae	n	NA	11	NA	NA	NA	NA	NA	NA	NA	NA	4	0	4	7	4	3	2	1	4
1259	Hemitripterus	Hemitripteridae	n	NA	3	NA	NA	NA	NA	NA	NA	NA	NA	1	0	0	1	0	0	3	0	0
1260	Heniochus	Chaetodontidae	n	NA	8	NA	NA	NA	NA	NA	NA	NA	NA	0	0	5	7	6	1	0	0	1
1261	Heterandria	Poeciliidae	n	NA	9	NA	NA	NA	NA	NA	NA	NA	NA	0	0	0	0	0	0	0	0	9
1262	Hirundichthys	Exocoetidae	n	NA	9	NA	NA	NA	NA	NA	NA	NA	NA	3	3	6	5	4	4	3	1	0
1263	Hyperprosopon	Embiotocidae	n	NA	3	NA	NA	NA	NA	NA	NA	NA	NA	0	0	0	0	0	3	3	0	0
1264	Hypoatherina	Atherinidae	n	NA	13	NA	NA	NA	NA	NA	NA	NA	NA	1	0	3	11	4	1	1	0	1
1265	Hyporhamphus	Hemiramphidae	n	NA	38	NA	NA	NA	NA	NA	NA	NA	NA	5	1	8	18	11	5	4	4	19
1266	Hyporthodus	Serranidae	n	NA	13	NA	NA	NA	NA	NA	NA	NA	NA	5	1	1	2	5	5	2	0	0
1267	Inimicus	Synanceiidae	n	NA	10	NA	NA	NA	NA	NA	NA	NA	NA	0	0	1	7	4	0	1	0	1
1268	Istiophorus	Istiophoridae	n	NA	2	NA	NA	NA	NA	NA	NA	NA	NA	2	1	1	1	1	1	1	0	0
1269	Jaydia	Apogonidae	n	NA	19	NA	NA	NA	NA	NA	NA	NA	NA	0	0	9	16	7	0	2	0	1
1270	Johnius	Sciaenidae	n	NA	34	NA	NA	NA	NA	NA	NA	NA	NA	0	1	6	29	4	0	2	0	16
1271	Julidochromis	Cichlidae	n	NA	5	NA	NA	NA	NA	NA	NA	NA	NA	0	0	0	0	0	0	0	0	5
1272	Knipowitschia	Gobiidae	n	NA	17	NA	NA	NA	NA	NA	NA	NA	NA	0	3	0	0	0	0	0	0	17
1273	Kryptolebias	Rivulidae	n	NA	8	NA	NA	NA	NA	NA	NA	NA	NA	0	0	0	0	0	0	0	0	8
1274	Labroides	Labridae	n	NA	5	NA	NA	NA	NA	NA	NA	NA	NA	0	1	1	3	5	0	0	0	0
1275	Lagocephalus	Tetraodontidae	n	NA	11	NA	NA	NA	NA	NA	NA	NA	NA	2	4	6	9	7	1	4	1	3
1276	Laimosemion	Rivulidae	n	NA	26	NA	NA	NA	NA	NA	NA	NA	NA	0	0	0	0	0	0	0	0	26
1277	Lamprologus	Cichlidae	n	NA	20	NA	NA	NA	NA	NA	NA	NA	NA	0	0	0	0	0	0	0	0	20
1278	Leiognathus	Leiognathidae	n	NA	8	NA	NA	NA	NA	NA	NA	NA	NA	0	0	7	6	3	0	0	0	3
1279	Leiopotherapon	Terapontidae	n	NA	4	NA	NA	NA	NA	NA	NA	NA	NA	0	0	0	0	0	0	0	0	4
1280	Lepadogaster	Gobiesocidae	n	NA	3	NA	NA	NA	NA	NA	NA	NA	NA	0	3	0	0	0	0	0	0	0
1281	Lepidiolamprologus	Cichlidae	n	NA	7	NA	NA	NA	NA	NA	NA	NA	NA	0	0	0	0	0	0	0	0	7
1282	Lepidopus	Trichiuridae	n	NA	6	NA	NA	NA	NA	NA	NA	NA	NA	1	2	1	1	3	2	2	1	0
1283	Lestradea	Cichlidae	n	NA	2	NA	NA	NA	NA	NA	NA	NA	NA	0	0	0	0	0	0	0	0	2
1284	Limanda	Pleuronectidae	n	NA	6	NA	NA	NA	NA	NA	NA	NA	NA	1	1	0	0	0	0	6	0	0
1285	Limnochromis	Cichlidae	n	NA	3	NA	NA	NA	NA	NA	NA	NA	NA	0	0	0	0	0	0	0	0	3
1286	Lindbergichthys	Nototheniidae	n	NA	2	NA	NA	NA	NA	NA	NA	NA	NA	0	0	0	0	0	0	0	2	0
1287	Liparis	Liparidae	n	NA	61	NA	NA	NA	NA	NA	NA	NA	NA	0	1	1	4	0	1	57	1	2
1288	Liza	Mugilidae	n	NA	20	NA	NA	NA	NA	NA	NA	NA	NA	0	9	8	6	3	0	2	1	17
1289	Lophiodes	Lophiidae	n	NA	17	NA	NA	NA	NA	NA	NA	NA	NA	4	1	2	8	6	3	1	0	0
1290	Luciogobius	Gobiidae	n	NA	16	NA	NA	NA	NA	NA	NA	NA	NA	0	0	0	9	0	1	5	0	8
1291	Lutjanus	Lutjanidae	n	NA	70	NA	NA	NA	NA	NA	NA	NA	NA	17	5	18	40	28	15	8	0	26
1292	Lycenchelys	Zoarcidae	n	NA	62	NA	NA	NA	NA	NA	NA	NA	NA	2	2	0	1	1	15	33	12	0
1293	Lycodapus	Zoarcidae	n	NA	13	NA	NA	NA	NA	NA	NA	NA	NA	0	0	0	0	0	3	11	3	0
1294	Lycodes	Zoarcidae	n	NA	64	NA	NA	NA	NA	NA	NA	NA	NA	2	0	0	1	0	2	64	0	1
1295	Macquaria	Percichthyidae	n	NA	4	NA	NA	NA	NA	NA	NA	NA	NA	0	0	0	0	0	0	0	0	4
1296	Macropharyngodon	Labridae	n	NA	12	NA	NA	NA	NA	NA	NA	NA	NA	0	1	5	5	6	0	0	0	0
1297	Maylandia	Cichlidae	n	NA	35	NA	NA	NA	NA	NA	NA	NA	NA	0	0	0	0	0	0	0	0	35
1298	Melanotaenia	Melanotaeniidae	n	NA	57	NA	NA	NA	NA	NA	NA	NA	NA	0	0	0	0	0	0	0	0	57
1299	Microchirus	Soleidae	n	NA	7	NA	NA	NA	NA	NA	NA	NA	NA	0	7	0	0	0	0	1	0	0
1300	Micropoecilia	Poeciliidae	n	NA	4	NA	NA	NA	NA	NA	NA	NA	NA	0	0	0	0	0	0	0	0	4
1301	Microstomus	Pleuronectidae	n	NA	4	NA	NA	NA	NA	NA	NA	NA	NA	0	1	0	1	2	1	3	0	0
1302	Moema	Rivulidae	n	NA	9	NA	NA	NA	NA	NA	NA	NA	NA	0	0	0	0	0	0	0	0	9
1303	Mola	Molidae	n	NA	2	NA	NA	NA	NA	NA	NA	NA	NA	1	1	1	1	1	1	1	0	0
1304	Monacanthus	Monacanthidae	n	NA	3	NA	NA	NA	NA	NA	NA	NA	NA	2	0	0	1	1	0	2	0	0
1305	Mugil	Mugilidae	n	NA	14	NA	NA	NA	NA	NA	NA	NA	NA	9	3	0	1	1	3	0	0	9
1306	Mugilogobius	Gobiidae	n	NA	32	NA	NA	NA	NA	NA	NA	NA	NA	0	0	1	8	5	0	0	1	32
1307	Mullus	Mullidae	n	NA	4	NA	NA	NA	NA	NA	NA	NA	NA	2	2	0	0	0	0	3	0	0
1308	Mycteroperca	Serranidae	n	NA	15	NA	NA	NA	NA	NA	NA	NA	NA	9	2	0	0	0	5	2	0	3
1309	Myoxocephalus	Cottidae	n	NA	16	NA	NA	NA	NA	NA	NA	NA	NA	2	1	0	0	0	0	14	0	8
1310	Nemipterus	Nemipteridae	n	NA	25	NA	NA	NA	NA	NA	NA	NA	NA	0	0	8	25	9	1	0	0	3
1311	Neoepinnula	Gempylidae	n	NA	2	NA	NA	NA	NA	NA	NA	NA	NA	2	1	1	1	1	0	1	0	0
1312	Neolamprologus	Cichlidae	n	NA	50	NA	NA	NA	NA	NA	NA	NA	NA	0	0	0	0	0	0	0	0	50
1313	Neopomacentrus	Pomacentridae	n	NA	16	NA	NA	NA	NA	NA	NA	NA	NA	0	0	9	11	7	0	0	0	2
1314	Nerophis	Syngnathidae	n	NA	3	NA	NA	NA	NA	NA	NA	NA	NA	0	3	0	0	0	0	2	0	1
1315	Nimbapanchax	Nothobranchiidae	n	NA	5	NA	NA	NA	NA	NA	NA	NA	NA	0	0	0	0	0	0	0	0	5
1316	Nimbochromis	Cichlidae	n	NA	5	NA	NA	NA	NA	NA	NA	NA	NA	0	0	0	0	0	0	0	0	5
1317	Nothobranchius	Nothobranchiidae	n	NA	71	NA	NA	NA	NA	NA	NA	NA	NA	0	0	0	0	0	0	0	0	71
1318	Nothonotus	Percidae	n	NA	4	NA	NA	NA	NA	NA	NA	NA	NA	0	0	0	0	0	0	0	0	4
1319	Notolabrus	Labridae	n	NA	7	NA	NA	NA	NA	NA	NA	NA	NA	0	0	0	3	6	0	0	4	1
1320	Notothenia	Nototheniidae	n	NA	7	NA	NA	NA	NA	NA	NA	NA	NA	0	1	0	0	0	1	0	7	0
1321	Ogcocephalus	Ogcocephalidae	n	NA	13	NA	NA	NA	NA	NA	NA	NA	NA	11	2	0	0	0	2	5	0	0
1322	Oligocottus	Cottidae	n	NA	4	NA	NA	NA	NA	NA	NA	NA	NA	0	0	0	0	0	1	4	0	0
1323	Oneirodes	Oneirodidae	n	NA	35	NA	NA	NA	NA	NA	NA	NA	NA	8	10	3	12	6	6	8	4	0
1324	Ophioblennius	Blenniidae	n	NA	5	NA	NA	NA	NA	NA	NA	NA	NA	3	1	0	0	0	3	0	0	0
1325	Ophthalmotilapia	Cichlidae	n	NA	4	NA	NA	NA	NA	NA	NA	NA	NA	0	0	0	0	0	0	0	0	4
1326	Oreochromis	Cichlidae	n	NA	32	NA	NA	NA	NA	NA	NA	NA	NA	0	0	0	0	0	0	0	0	32
1327	Orthochromis	Cichlidae	n	NA	14	NA	NA	NA	NA	NA	NA	NA	NA	0	0	0	0	0	0	0	0	14
1328	Oryzias	Adrianichthyidae	n	NA	33	NA	NA	NA	NA	NA	NA	NA	NA	0	0	0	0	0	0	0	0	33
1329	Ostorhinchus	Apogonidae	n	NA	89	NA	NA	NA	NA	NA	NA	NA	NA	1	0	23	72	41	1	1	0	7
1330	Oxycheilinus	Labridae	n	NA	9	NA	NA	NA	NA	NA	NA	NA	NA	0	1	4	7	6	0	0	0	1
1331	Pachymetopon	Sparidae	n	NA	3	NA	NA	NA	NA	NA	NA	NA	NA	0	3	3	0	0	0	0	0	0
1332	Padogobius	Gobiidae	n	NA	2	NA	NA	NA	NA	NA	NA	NA	NA	0	0	0	0	0	0	0	0	2
1333	Pagellus	Sparidae	n	NA	6	NA	NA	NA	NA	NA	NA	NA	NA	0	5	2	0	0	0	1	0	0
1334	Pagrus	Sparidae	n	NA	6	NA	NA	NA	NA	NA	NA	NA	NA	1	4	0	2	1	0	2	1	3
1335	Parablennius	Blenniidae	n	NA	26	NA	NA	NA	NA	NA	NA	NA	NA	2	15	5	6	5	0	4	3	3
1336	Paracirrhites	Cirrhitidae	n	NA	6	NA	NA	NA	NA	NA	NA	NA	NA	0	0	0	3	6	0	0	0	0
1337	Paralabrax	Serranidae	n	NA	9	NA	NA	NA	NA	NA	NA	NA	NA	1	0	0	0	0	8	1	0	1
1338	Paralichthys	Paralichthyidae	n	NA	18	NA	NA	NA	NA	NA	NA	NA	NA	10	0	0	1	1	7	4	1	7
1339	Paraliparis	Liparidae	n	NA	142	NA	NA	NA	NA	NA	NA	NA	NA	2	5	1	12	5	14	34	81	0
1340	Paraneetroplus	Cichlidae	n	NA	12	NA	NA	NA	NA	NA	NA	NA	NA	0	0	0	0	0	0	0	0	12
1341	Parapercis	Pinguipedidae	n	NA	75	NA	NA	NA	NA	NA	NA	NA	NA	0	5	14	52	31	1	0	2	2
1342	Parapriacanthus	Pempheridae	n	NA	4	NA	NA	NA	NA	NA	NA	NA	NA	0	0	1	4	2	0	0	1	0
1343	Parma	Pomacentridae	n	NA	10	NA	NA	NA	NA	NA	NA	NA	NA	0	0	0	5	7	0	0	2	0
1344	Pelates	Terapontidae	n	NA	3	NA	NA	NA	NA	NA	NA	NA	NA	0	0	1	3	2	0	0	1	2
1345	Pelmatochromis	Cichlidae	n	NA	3	NA	NA	NA	NA	NA	NA	NA	NA	0	0	0	0	0	0	0	0	3
1346	Pempheris	Pempheridae	n	NA	28	NA	NA	NA	NA	NA	NA	NA	NA	3	0	10	19	13	0	0	2	1
1347	Pentapodus	Nemipteridae	n	NA	12	NA	NA	NA	NA	NA	NA	NA	NA	0	0	0	12	6	0	0	0	1
1348	Peprilus	Stromateidae	n	NA	7	NA	NA	NA	NA	NA	NA	NA	NA	5	0	0	0	0	4	3	0	2
1349	Perissodus	Cichlidae	n	NA	2	NA	NA	NA	NA	NA	NA	NA	NA	0	0	0	0	0	0	0	0	2
1350	Petrochromis	Cichlidae	n	NA	8	NA	NA	NA	NA	NA	NA	NA	NA	0	0	0	0	0	0	0	0	8
1351	Phallichthys	Poeciliidae	n	NA	4	NA	NA	NA	NA	NA	NA	NA	NA	0	0	0	0	0	0	0	0	4
1352	Pholis	Pholidae	n	NA	11	NA	NA	NA	NA	NA	NA	NA	NA	1	1	0	2	0	0	11	0	1
1353	Platycephalus	Platycephalidae	n	NA	17	NA	NA	NA	NA	NA	NA	NA	NA	0	0	2	12	10	0	1	11	6
1354	Plecodus	Cichlidae	n	NA	4	NA	NA	NA	NA	NA	NA	NA	NA	0	0	0	0	0	0	0	0	4
1355	Plectorhinchus	Haemulidae	n	NA	28	NA	NA	NA	NA	NA	NA	NA	NA	0	2	16	19	8	0	1	1	5
1356	Plectroglyphidodon	Pomacentridae	n	NA	10	NA	NA	NA	NA	NA	NA	NA	NA	0	0	4	6	9	1	0	0	0
1357	Pleuronectes	Pleuronectidae	n	NA	3	NA	NA	NA	NA	NA	NA	NA	NA	0	1	0	0	0	0	3	0	2
1358	Poecilia	Poeciliidae	n	NA	40	NA	NA	NA	NA	NA	NA	NA	NA	0	0	0	0	0	0	0	0	40
1359	Poeciliopsis	Poeciliidae	n	NA	24	NA	NA	NA	NA	NA	NA	NA	NA	0	0	0	0	0	1	0	0	24
1360	Polydactylus	Polynemidae	n	NA	21	NA	NA	NA	NA	NA	NA	NA	NA	4	3	5	10	5	2	0	0	14
1361	Pomachromis	Pomacentridae	n	NA	4	NA	NA	NA	NA	NA	NA	NA	NA	0	0	0	1	4	0	0	0	0
1362	Pomadasys	Haemulidae	n	NA	35	NA	NA	NA	NA	NA	NA	NA	NA	6	7	12	10	5	8	0	0	20
1363	Pomatoschistus	Gobiidae	n	NA	12	NA	NA	NA	NA	NA	NA	NA	NA	0	9	0	0	0	0	5	0	8
1364	Ponticola	Gobiidae	n	NA	14	NA	NA	NA	NA	NA	NA	NA	NA	0	6	0	0	0	0	0	0	13
1365	Priacanthus	Priacanthidae	n	NA	12	NA	NA	NA	NA	NA	NA	NA	NA	1	1	4	7	6	0	1	1	0
1366	Priapichthys	Poeciliidae	n	NA	7	NA	NA	NA	NA	NA	NA	NA	NA	0	0	0	0	0	0	0	0	7
1367	Prionotus	Triglidae	n	NA	23	NA	NA	NA	NA	NA	NA	NA	NA	19	0	0	0	0	7	6	0	11
1368	Pristiapogon	Apogonidae	n	NA	5	NA	NA	NA	NA	NA	NA	NA	NA	2	0	4	3	4	0	0	0	1
1369	Pristigenys	Priacanthidae	n	NA	5	NA	NA	NA	NA	NA	NA	NA	NA	1	0	2	3	2	1	1	0	0
1370	Psenes	Nomeidae	n	NA	5	NA	NA	NA	NA	NA	NA	NA	NA	4	3	3	3	3	4	2	1	1
1371	Pseudanthias	Serranidae	n	NA	62	NA	NA	NA	NA	NA	NA	NA	NA	0	1	20	34	33	0	0	0	0
1372	Pseudobalistes	Balistidae	n	NA	3	NA	NA	NA	NA	NA	NA	NA	NA	0	0	2	2	2	1	0	0	1
1373	Pseudocaranx	Carangidae	n	NA	4	NA	NA	NA	NA	NA	NA	NA	NA	0	0	0	2	3	1	0	1	2
1374	Pseudochromis	Pseudochromidae	n	NA	70	NA	NA	NA	NA	NA	NA	NA	NA	0	0	27	45	9	1	0	0	0
1375	Pseudocrenilabrus	Cichlidae	n	NA	3	NA	NA	NA	NA	NA	NA	NA	NA	0	0	0	0	0	0	0	0	3
1376	Pseudogramma	Serranidae	n	NA	11	NA	NA	NA	NA	NA	NA	NA	NA	1	1	2	4	5	2	0	1	0
1377	Pseudolabrus	Labridae	n	NA	12	NA	NA	NA	NA	NA	NA	NA	NA	0	0	0	4	7	0	1	1	0
1378	Pseudopleuronectes	Pleuronectidae	n	NA	5	NA	NA	NA	NA	NA	NA	NA	NA	1	0	0	2	0	0	5	0	0
1379	Pseudorhombus	Paralichthyidae	n	NA	25	NA	NA	NA	NA	NA	NA	NA	NA	0	0	4	22	8	1	3	2	2
1380	Pseudotolithus	Sciaenidae	n	NA	6	NA	NA	NA	NA	NA	NA	NA	NA	0	6	0	0	0	0	0	0	4
1381	Pseudupeneus	Mullidae	n	NA	3	NA	NA	NA	NA	NA	NA	NA	NA	2	1	0	0	0	2	1	0	0
1382	Ptereleotris	Microdesmidae	n	NA	20	NA	NA	NA	NA	NA	NA	NA	NA	3	0	5	14	9	1	0	0	0
1383	Pterocaesio	Caesionidae	n	NA	12	NA	NA	NA	NA	NA	NA	NA	NA	0	0	6	11	7	0	0	0	0
1384	Pterois	Scorpaenidae	n	NA	10	NA	NA	NA	NA	NA	NA	NA	NA	0	1	6	8	5	0	1	0	1
1385	Pterolebias	Rivulidae	n	NA	3	NA	NA	NA	NA	NA	NA	NA	NA	0	0	0	0	0	0	0	0	3
1386	Rexea	Gempylidae	n	NA	7	NA	NA	NA	NA	NA	NA	NA	NA	0	1	1	5	6	1	0	1	1
1387	Rhabdosargus	Sparidae	n	NA	6	NA	NA	NA	NA	NA	NA	NA	NA	0	1	4	2	1	0	0	0	4
1388	Rhacochilus	Embiotocidae	n	NA	2	NA	NA	NA	NA	NA	NA	NA	NA	0	0	0	0	0	0	2	0	0
1389	Rhamphochromis	Cichlidae	n	NA	6	NA	NA	NA	NA	NA	NA	NA	NA	0	0	0	0	0	0	0	0	6
1390	Rheocles	Bedotiidae	n	NA	7	NA	NA	NA	NA	NA	NA	NA	NA	0	0	0	0	0	0	0	0	7
1391	Rivulus	Rivulidae	n	NA	5	NA	NA	NA	NA	NA	NA	NA	NA	0	0	0	0	0	0	0	0	5
1392	Salaria	Blenniidae	n	NA	5	NA	NA	NA	NA	NA	NA	NA	NA	0	3	0	0	0	0	0	0	4
1393	Sander	Percidae	n	NA	5	NA	NA	NA	NA	NA	NA	NA	NA	0	0	0	0	0	0	0	0	5
1394	Sarda	Scombridae	n	NA	5	NA	NA	NA	NA	NA	NA	NA	NA	2	2	1	1	2	3	4	0	1
1395	Sargochromis	Cichlidae	n	NA	8	NA	NA	NA	NA	NA	NA	NA	NA	0	0	0	0	0	0	0	0	8
1396	Sarotherodon	Cichlidae	n	NA	13	NA	NA	NA	NA	NA	NA	NA	NA	0	1	0	0	1	0	0	0	13
1397	Sarritor	Agonidae	n	NA	3	NA	NA	NA	NA	NA	NA	NA	NA	0	0	0	0	0	0	3	0	0
1398	Scarus	Scaridae	n	NA	52	NA	NA	NA	NA	NA	NA	NA	NA	9	1	17	32	26	4	0	0	3
1399	Scatophagus	Scatophagidae	n	NA	2	NA	NA	NA	NA	NA	NA	NA	NA	0	0	1	1	1	0	0	0	2
1400	Schedophilus	Centrolophidae	n	NA	8	NA	NA	NA	NA	NA	NA	NA	NA	2	6	5	4	3	1	1	3	0
1401	Scophthalmus	Scophthalmidae	n	NA	4	NA	NA	NA	NA	NA	NA	NA	NA	1	3	0	0	0	0	4	0	1
1402	Scorpaena	Scorpaenidae	n	NA	61	NA	NA	NA	NA	NA	NA	NA	NA	15	18	1	11	14	14	6	2	3
1403	Scorpaenodes	Scorpaenidae	n	NA	28	NA	NA	NA	NA	NA	NA	NA	NA	2	4	13	14	13	3	0	0	1
1404	Scorpaenopsis	Scorpaenidae	n	NA	28	NA	NA	NA	NA	NA	NA	NA	NA	0	0	15	18	18	1	1	0	2
1405	Sebastolobus	Sebastidae	n	NA	3	NA	NA	NA	NA	NA	NA	NA	NA	0	0	0	0	0	2	3	0	0
1406	Selar	Carangidae	n	NA	2	NA	NA	NA	NA	NA	NA	NA	NA	1	1	1	2	2	1	1	0	0
1407	Selene	Carangidae	n	NA	8	NA	NA	NA	NA	NA	NA	NA	NA	7	1	0	0	0	5	2	0	3
1408	Serranochromis	Cichlidae	n	NA	11	NA	NA	NA	NA	NA	NA	NA	NA	0	0	0	0	0	0	0	0	11
1409	Serranus	Serranidae	n	NA	29	NA	NA	NA	NA	NA	NA	NA	NA	14	9	2	1	0	6	3	0	0
1410	Sicyopterus	Gobiidae	n	NA	35	NA	NA	NA	NA	NA	NA	NA	NA	0	0	1	6	5	0	0	0	35
1411	Simochromis	Cichlidae	n	NA	5	NA	NA	NA	NA	NA	NA	NA	NA	0	0	0	0	0	0	0	0	5
1412	Skiffia	Goodeidae	n	NA	4	NA	NA	NA	NA	NA	NA	NA	NA	0	0	0	0	0	0	0	0	4
1413	Solea	Soleidae	n	NA	9	NA	NA	NA	NA	NA	NA	NA	NA	0	3	5	3	0	0	1	0	3
1414	Spathodus	Cichlidae	n	NA	2	NA	NA	NA	NA	NA	NA	NA	NA	0	0	0	0	0	0	0	0	2
1415	Sphoeroides	Tetraodontidae	n	NA	22	NA	NA	NA	NA	NA	NA	NA	NA	12	4	2	1	2	11	5	2	9
1416	Spicara	Sparidae	n	NA	8	NA	NA	NA	NA	NA	NA	NA	NA	1	6	2	0	0	0	0	0	0
1417	Steatocranus	Cichlidae	n	NA	9	NA	NA	NA	NA	NA	NA	NA	NA	0	0	0	0	0	0	0	0	9
1418	Stegastes	Pomacentridae	n	NA	37	NA	NA	NA	NA	NA	NA	NA	NA	11	3	6	10	10	8	1	0	1
1419	Stellifer	Sciaenidae	n	NA	24	NA	NA	NA	NA	NA	NA	NA	NA	15	0	0	0	0	13	1	0	10
1420	Stereolepis	Polyprionidae	n	NA	2	NA	NA	NA	NA	NA	NA	NA	NA	1	0	0	1	0	1	2	0	0
1421	Stiphodon	Gobiidae	n	NA	34	NA	NA	NA	NA	NA	NA	NA	NA	0	0	0	7	1	0	0	0	34
1422	Stromateus	Stromateidae	n	NA	3	NA	NA	NA	NA	NA	NA	NA	NA	2	1	1	0	0	1	0	2	0
1423	Strongylura	Belonidae	n	NA	14	NA	NA	NA	NA	NA	NA	NA	NA	4	1	3	5	3	3	2	1	11
1424	Syacium	Paralichthyidae	n	NA	8	NA	NA	NA	NA	NA	NA	NA	NA	5	2	1	0	0	5	3	0	1
1425	Symphodus	Labridae	n	NA	10	NA	NA	NA	NA	NA	NA	NA	NA	0	10	0	0	0	0	1	0	3
1426	Syngnathus	Syngnathidae	n	NA	32	NA	NA	NA	NA	NA	NA	NA	NA	11	9	2	1	0	8	11	0	13
1427	Takifugu	Tetraodontidae	n	NA	26	NA	NA	NA	NA	NA	NA	NA	NA	0	0	1	21	0	0	14	0	7
1428	Telmatochromis	Cichlidae	n	NA	6	NA	NA	NA	NA	NA	NA	NA	NA	0	0	0	0	0	0	0	0	6
1429	Terapon	Terapontidae	n	NA	3	NA	NA	NA	NA	NA	NA	NA	NA	0	0	2	3	3	0	1	0	3
1430	Tetrapturus	Istiophoridae	n	NA	4	NA	NA	NA	NA	NA	NA	NA	NA	2	2	2	0	1	0	2	0	0
1431	Thalassoma	Labridae	n	NA	28	NA	NA	NA	NA	NA	NA	NA	NA	2	6	10	11	12	7	1	0	0
1432	Theraps	Cichlidae	n	NA	8	NA	NA	NA	NA	NA	NA	NA	NA	0	0	0	0	0	0	0	0	8
1433	Thoracochromis	Cichlidae	n	NA	12	NA	NA	NA	NA	NA	NA	NA	NA	0	0	0	0	0	0	0	0	12
1434	Thorichthys	Cichlidae	n	NA	8	NA	NA	NA	NA	NA	NA	NA	NA	0	0	0	0	0	0	0	0	8
1435	Tigrigobius	Gobiidae	n	NA	12	NA	NA	NA	NA	NA	NA	NA	NA	9	1	0	0	0	4	0	0	0
1436	Tilapia	Cichlidae	n	NA	38	NA	NA	NA	NA	NA	NA	NA	NA	0	0	0	0	0	0	0	0	38
1437	Tomocichla	Cichlidae	n	NA	3	NA	NA	NA	NA	NA	NA	NA	NA	0	0	0	0	0	0	0	0	3
1438	Trematomus	Nototheniidae	n	NA	11	NA	NA	NA	NA	NA	NA	NA	NA	0	1	0	0	0	0	0	11	0
1439	Trinectes	Achiridae	n	NA	10	NA	NA	NA	NA	NA	NA	NA	NA	8	0	0	0	0	5	1	0	7
1440	Tropheus	Cichlidae	n	NA	6	NA	NA	NA	NA	NA	NA	NA	NA	0	0	0	0	0	0	0	0	6
1441	Tylochromis	Cichlidae	n	NA	18	NA	NA	NA	NA	NA	NA	NA	NA	0	0	0	0	0	0	0	0	18
1442	Tylosurus	Belonidae	n	NA	7	NA	NA	NA	NA	NA	NA	NA	NA	2	2	3	5	3	4	2	0	1
1443	Umbrina	Sciaenidae	n	NA	17	NA	NA	NA	NA	NA	NA	NA	NA	7	4	3	0	1	8	0	0	2
1444	Upeneus	Mullidae	n	NA	37	NA	NA	NA	NA	NA	NA	NA	NA	1	1	15	22	11	1	1	2	6
1445	Vanacampus	Syngnathidae	n	NA	4	NA	NA	NA	NA	NA	NA	NA	NA	0	0	0	3	2	0	0	2	2
1446	Vanneaugobius	Gobiidae	n	NA	3	NA	NA	NA	NA	NA	NA	NA	NA	0	3	0	0	0	0	0	0	0
1447	Vieja	Cichlidae	n	NA	2	NA	NA	NA	NA	NA	NA	NA	NA	0	0	0	0	0	0	0	0	2
1448	Xeneretmus	Agonidae	n	NA	4	NA	NA	NA	NA	NA	NA	NA	NA	0	0	0	0	0	2	3	0	0
1449	Xenotilapia	Cichlidae	n	NA	18	NA	NA	NA	NA	NA	NA	NA	NA	0	0	0	0	0	0	0	0	18
1450	Xenotoca	Goodeidae	n	NA	3	NA	NA	NA	NA	NA	NA	NA	NA	0	0	0	0	0	0	0	0	3
1451	Xyrichtys	Labridae	n	NA	10	NA	NA	NA	NA	NA	NA	NA	NA	4	3	0	1	0	4	0	0	0
1452	Zebrasoma	Acanthuridae	n	NA	7	NA	NA	NA	NA	NA	NA	NA	NA	1	0	4	3	4	1	0	0	0
1453	Zebrias	Soleidae	n	NA	18	NA	NA	NA	NA	NA	NA	NA	NA	0	0	3	15	4	0	3	1	2
1454	Zingel	Percidae	n	NA	4	NA	NA	NA	NA	NA	NA	NA	NA	0	0	0	0	0	0	0	0	4
